# Supplementary material for: Structure-based design, synthesis, and biological activity evaluation of chalcone-piperazine derivatives as dual AChE and MAO B inhibitors
Source: Royal Society of Chemistry journal article supplement (doi:10.1039/d5ra05397h), 2025-01-01
Supplement: d5ra05397h1.pdf [file d5ra05397h1.pdf]

## Supplementary Information

### Structure-Based Design, Synthesis, and Biological Activity Evaluation of Chalcone-Piperazine DerivativeSaSDual AChE and MAO B Inhibitors

Berkant Kurban<sup>abc</sup>, Begüm Nurpelin Sağlık Özkan<sup>bd</sup>, Derya Osmaniye<sup>bd</sup>, Serkan Levent<sup>de</sup>, Yusuf  
Özkay<sup>bd</sup>, Zafer Asım Kaplancıklı<sup>\*bf</sup>

<sup>a</sup>Department of Pharmaceutical Chemistry, Faculty of Pharmacy, Afyonkarahisar Health Sciences University,  
03030 Afyonkarahisar, Türkiye

<sup>b</sup>Department of Pharmaceutical Chemistry, Faculty of Pharmacy, Anadolu University, 26470 Eskişehir, Türkiye

<sup>c</sup>Graduate School, Anadolu University 26470 Eskişehir, Türkiye <sup>d</sup>Central Research Laboratory (MERLAB), Faculty  
of Pharmacy, Anadolu University, 26470 Eskişehir, Türkiye

<sup>e</sup>Department of Analytical Chemistry, Faculty of Pharmacy, Anadolu University, 26470 Eskişehir, Türkiye

<sup>f</sup>Pharmacy Services, Vocational School of Health Services, Bilecik Şeyh Edebali University, 11000, Bilecik, Türkiye

\* Corresponding author.

*E-mail address:* zakaplan@anadolu.edu.tr (Z.A.Kaplancıklı).

*Tel:* +90-222-3350580/3779 *Fax:* +90-222-3350750.

*Address:* Anadolu University, Faculty of Pharmacy, Department of Pharmaceutical Chemistry, 26470,  
Eskişehir, Turkey.

## DOPNALAB

| Item               | Value                                                               |
|--------------------|---------------------------------------------------------------------|
| Acquired Date&Time | 17.05.2023 14:43:27                                                 |
| Acquired by        | System Administrator                                                |
| Filename           | C:\Users\dopnalab\Desktop\WASAUSTU\derya\berkant\AL seri\AL-11.ispd |
| Spectrum name      | AL-11                                                               |
| Sample name        | AL-1                                                                |
| Sample ID          |                                                                     |
| Option             |                                                                     |
| Comment            |                                                                     |
| No. of Scans       | 15                                                                  |
| Resolution         | 4 [cm-1]                                                            |
| Apodization        | Happ-Genzel                                                         |

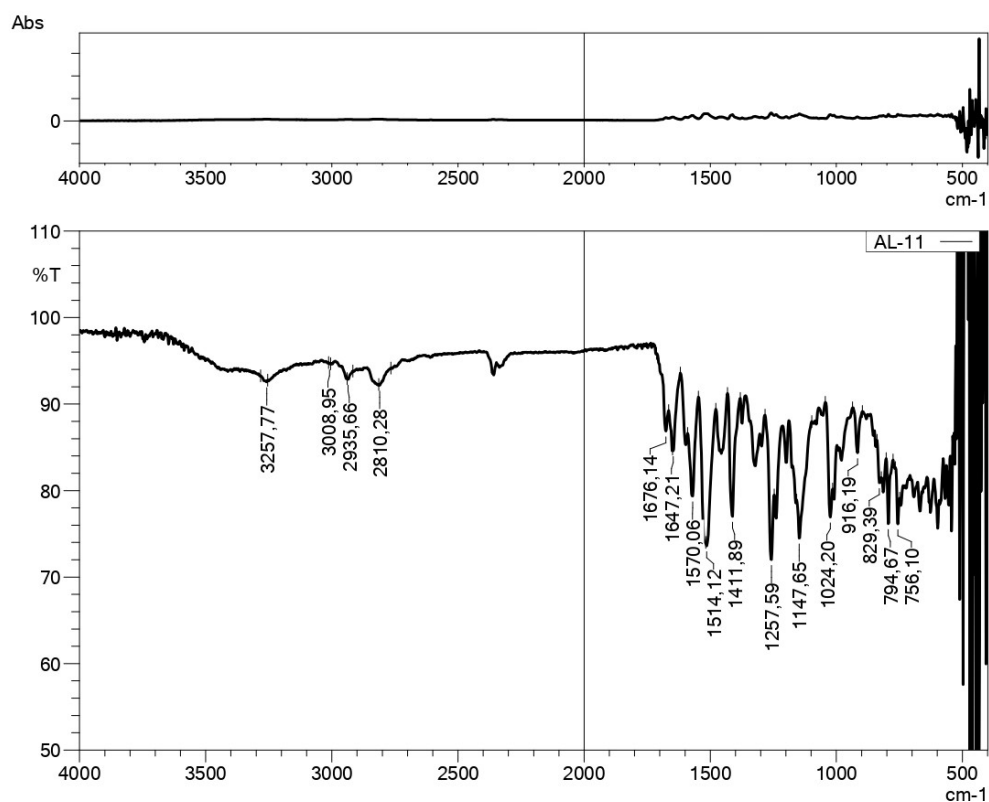

**Figure S1.** FTIR spectra of compound **4a**

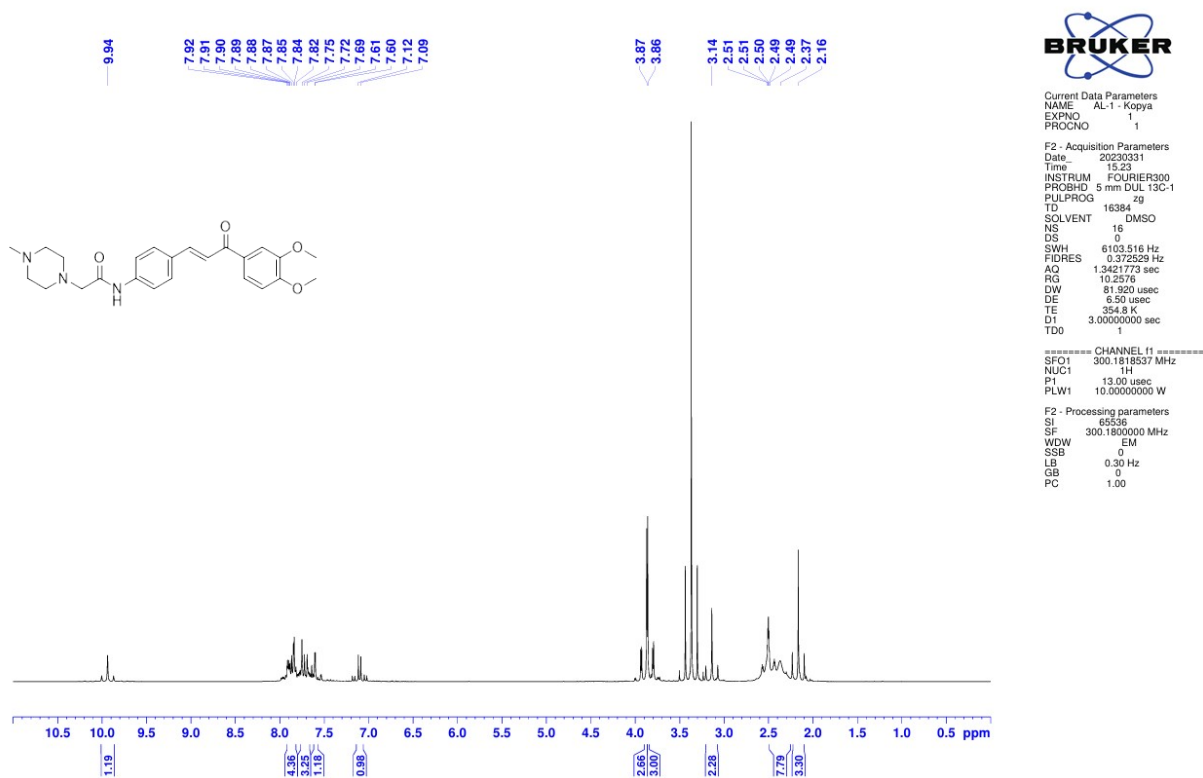

Figure S2. <sup>1</sup>H-NMR spectra of compound 4a

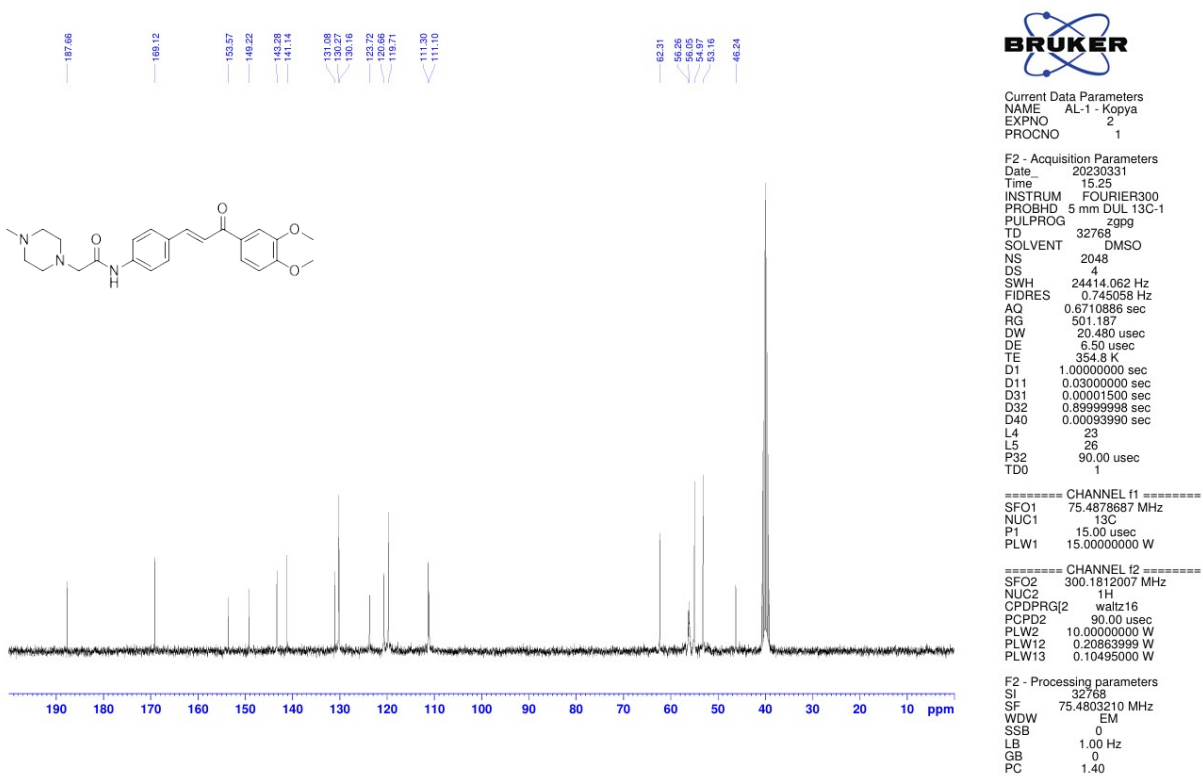

Figure S3. <sup>13</sup>C-NMR spectra of compound 4a

Data File: C:\LabSolutions\Data\Analiz\Serkan\AL-1\_197.lcd

| Elmt | Val. | Min | Max | Use Adduct |
|------|------|-----|-----|------|------|-----|-----|------|------|-----|-----|------|------|-----|-----|------------|
| H    | 1    | 0   | 30  | O    | 2    | 0   | 5   | Cl   | 1    | 0   | 0   | I    | 3    | 0   | 0   | H          |
| B    | 3    | 0   | 0   | F    | 1    | 0   | 0   | Br   | 1    | 0   | 0   |      |      |     |     |            |
| C    | 4    | 0   | 32  | P    | 3    | 0   | 0   | Ru   | 2    | 0   | 0   |      |      |     |     |            |
| N    | 3    | 0   | 5   | S    | 2    | 0   | 2   | Pd   | 2    | 0   | 0   |      |      |     |     |            |

Error Margin (ppm): 5

DBE Range: 5.0 - 25.0

Electron Ions: odd

HC Ratio: unlimited

Apply N Rule: yes

Use MSn Info: yes

Max Isotopes: 3

Isotope RI (%): 1.00

Isotope Res: 9000

MSn Iso RI (%): 10.00

MSn Logic Mode: AND

Max Results: 50

Event#: 1 MS(E+) Ret. Time : 1.893 Scan#: 285

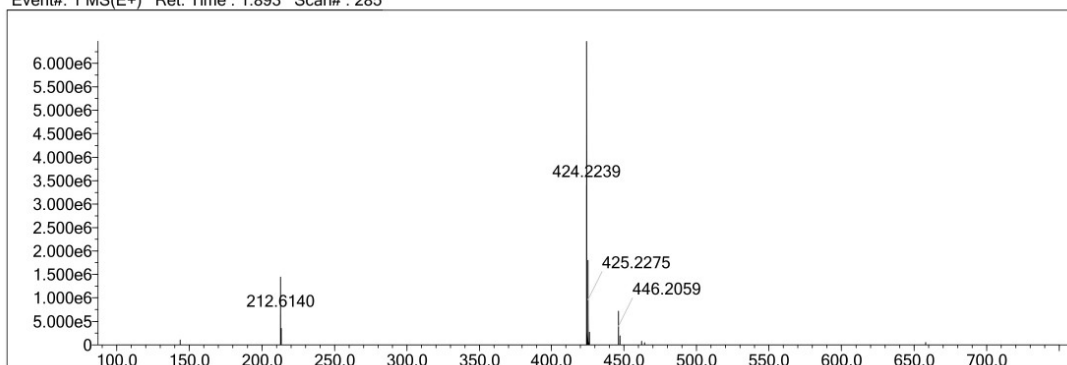

Measured region for 424.2239 m/z

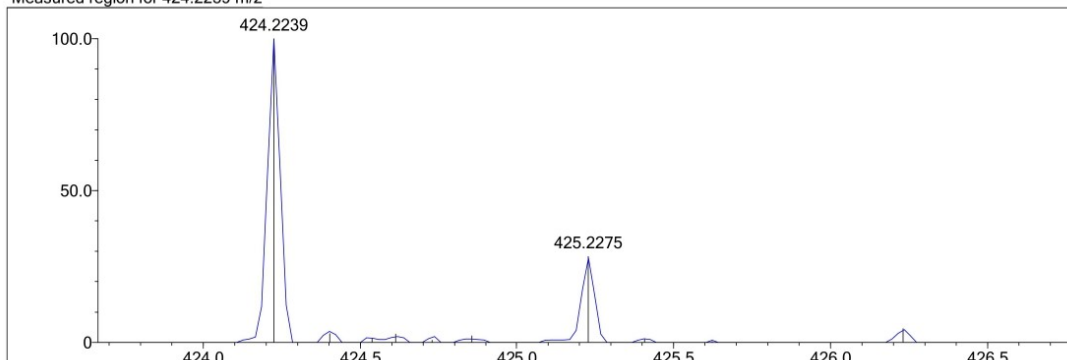

C24 H29 N3 O4 [M+H]+ : Predicted region for 424.2231 m/z

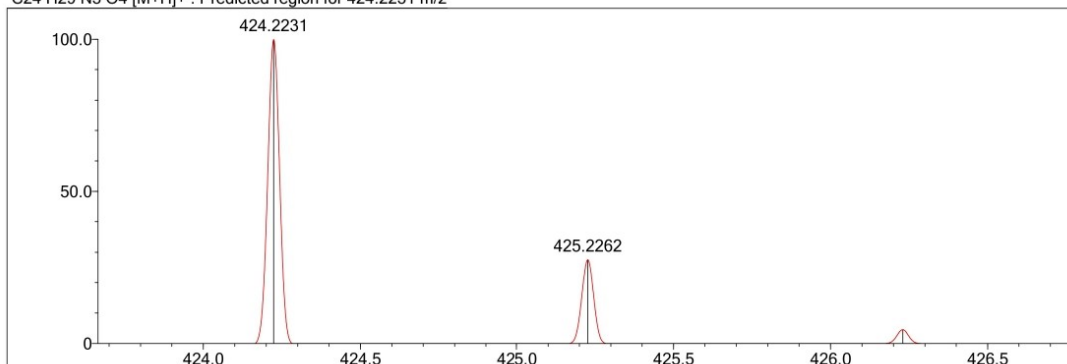

| Rank | Score | Formula (M)   | Ion                | Meas. m/z | Pred. m/z | Df. (mDa) | Df. (ppm) | Iso    | DBE  |
|------|-------|---------------|--------------------|-----------|-----------|-----------|-----------|--------|------|
| 1    | 97.78 | C24 H29 N3 O4 | [M+H] <sup>+</sup> | 424.2239  | 424.2231  | 0.8       | 1.89      | 100.00 | 12.0 |

Figure S4. HRMS spectra of compound 4a



# ==== Shimadzu LCMSsolution Analysis Report ====

Acquired by : Admin  
 Sample Name : AL-1  
 Sample ID :  
 Vial # : 1  
 Injection Volume : 0.5 uL  
 Data File Name : AL-1\_197.lcd  
 Method File Name : isocratic\_serkan.lcm  
 Batch File Name : batch.lcb  
 Report File Name : DefaultLCMS.lcr  
 Data Acquired : 02.08.2022 16:48:01  
 Data Processed : 04.09.2025 10:33:36

## <Chromatogram>

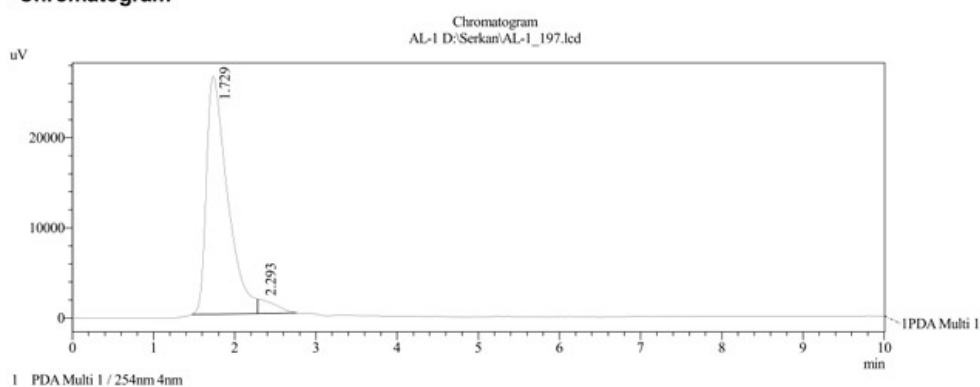

PDA Ch1 254nm 4nm

| Peak# | Ret. Time | Area   | Height | Area %  |
|-------|-----------|--------|--------|---------|
| 1     | 1.729     | 476869 | 26376  | 95.541  |
| 2     | 2.293     | 22255  | 1555   | 4.459   |
| Total |           | 499125 | 27932  | 100.000 |

PeakTable

**Figure S5.** HPLC chromatogram of compound **4a**

## DOPNALAB

| Item               | Value                                                                 |
|--------------------|-----------------------------------------------------------------------|
| Acquired Date&Time | 17.05.2023 14:51:56                                                   |
| Acquired by        | System Administrator                                                  |
| Filename           | C:\Users\dopnalab\Desktop\MASAÜSTÜ\derya\berkant\AL_serisi\AL-21.ispd |
| Spectrum name      | AL-21                                                                 |
| Sample name        | AL-2                                                                  |
| Sample ID          |                                                                       |
| Option             |                                                                       |
| Comment            |                                                                       |
| No. of Scans       | 15                                                                    |
| Resolution         | 4 [cm-1]                                                              |
| Apodization        | Happ-Genzel                                                           |

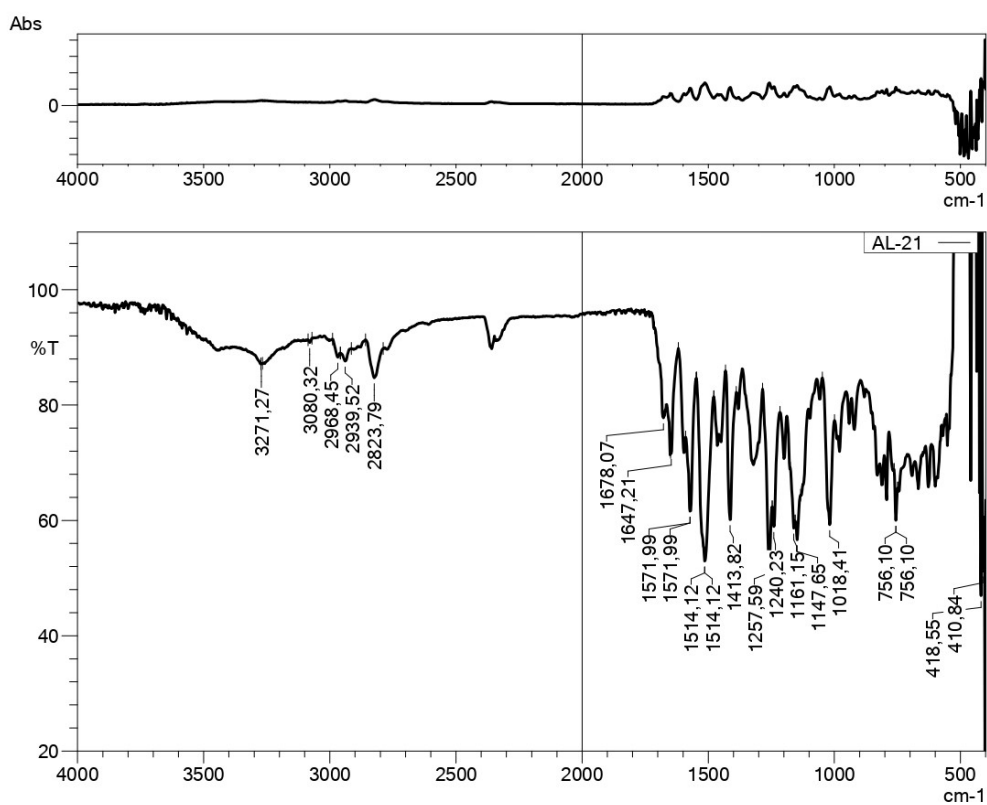

**Figure S6.** FTIR spectra of compound **4b**

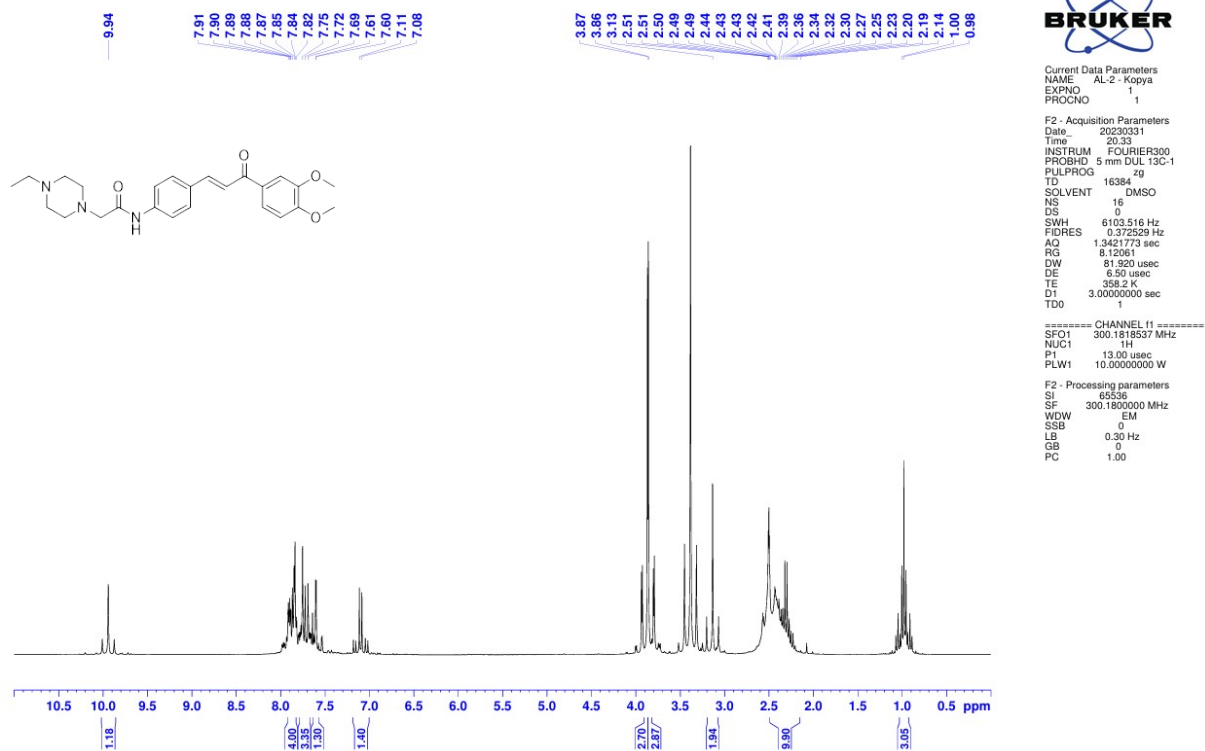

Figure S7. <sup>1</sup>H-NMR spectra of compound 4b

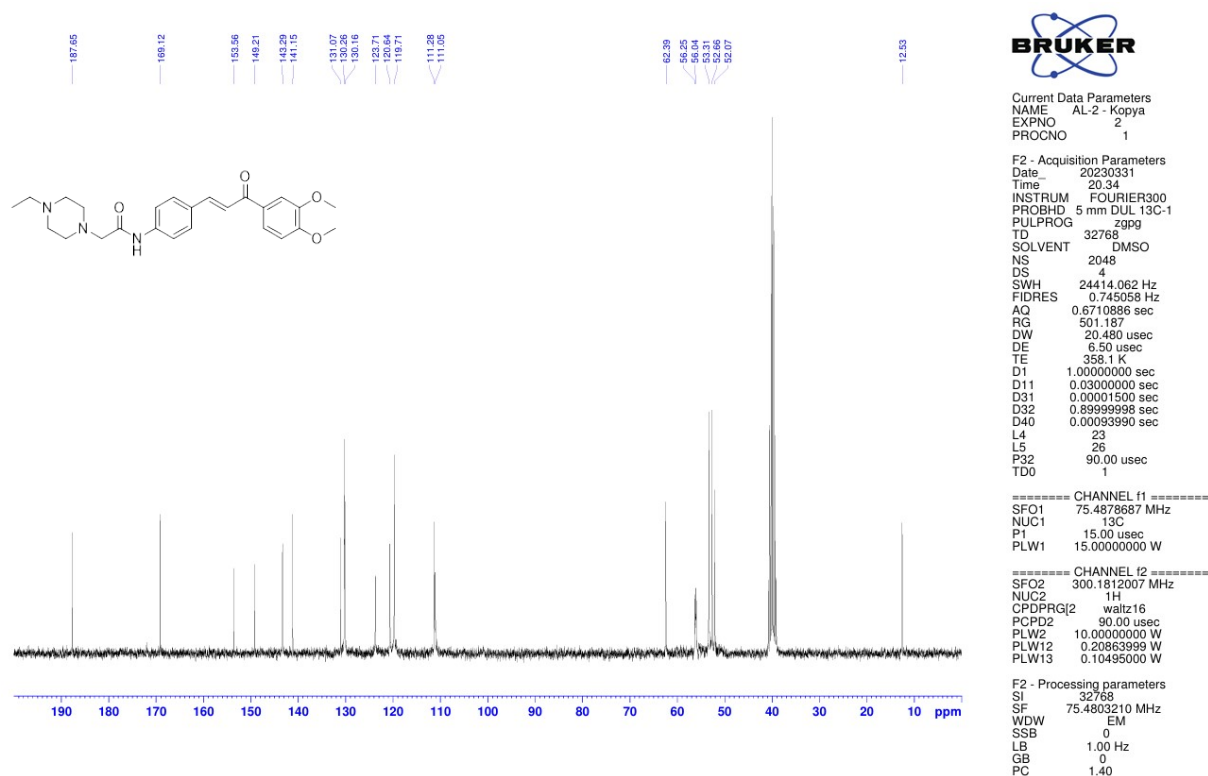

Figure S8. <sup>13</sup>C-NMR spectra of compound 4b

Data File: C:\LabSolutions\Data\Analiz\Serkan\AL-2\_198.lcd

| Elmt | Val. | Min | Max | Use Adduct |
|------|------|-----|-----|------|------|-----|-----|------|------|-----|-----|------|------|-----|-----|------------|
| H    | 1    | 0   | 32  | O    | 2    | 0   | 5   | Cl   | 1    | 0   | 0   | I    | 3    | 0   | 0   | H          |
| B    | 3    | 0   | 0   | F    | 1    | 0   | 0   | Br   | 1    | 0   | 0   |      |      |     |     |            |
| C    | 4    | 0   | 32  | P    | 3    | 0   | 0   | Ru   | 2    | 0   | 0   |      |      |     |     |            |
| N    | 3    | 0   | 5   | S    | 2    | 0   | 2   | Pd   | 2    | 0   | 0   |      |      |     |     |            |

Error Margin (ppm): 5

HC Ratio: unlimited

Max Isotopes: 3

MSn Iso RI (%): 10.00

DBE Range: 5.0 - 25.0

Apply N Rule: yes

Isotope RI (%): 1.00

MSn Logic Mode: AND

Electron Ions: odd

Use MSn Info: yes

Isotope Res: 9000

Max Results: 50

Event#: 1 MS(E+) Ret. Time : 1.907 Scan# : 287

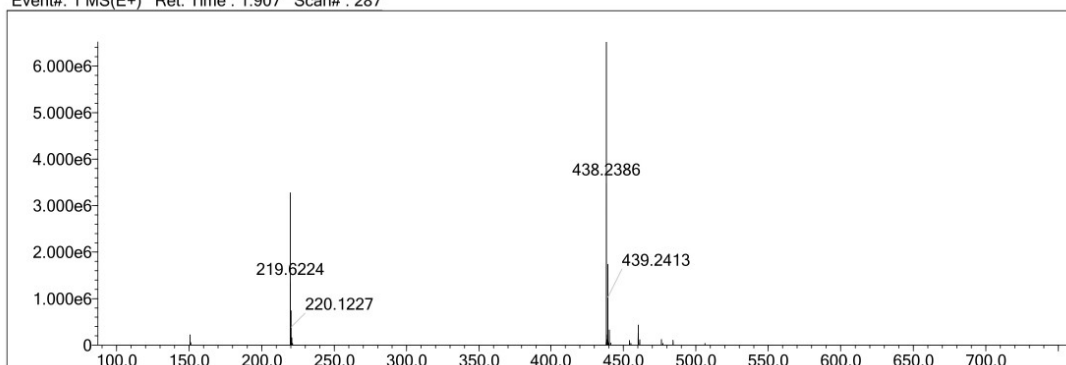

Measured region for 438.2386 m/z

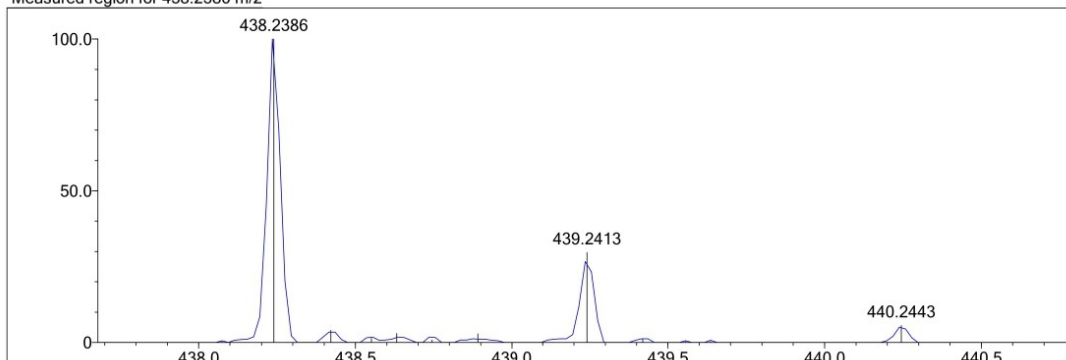

C25 H31 N3 O4 [M+H]+ : Predicted region for 438.2387 m/z

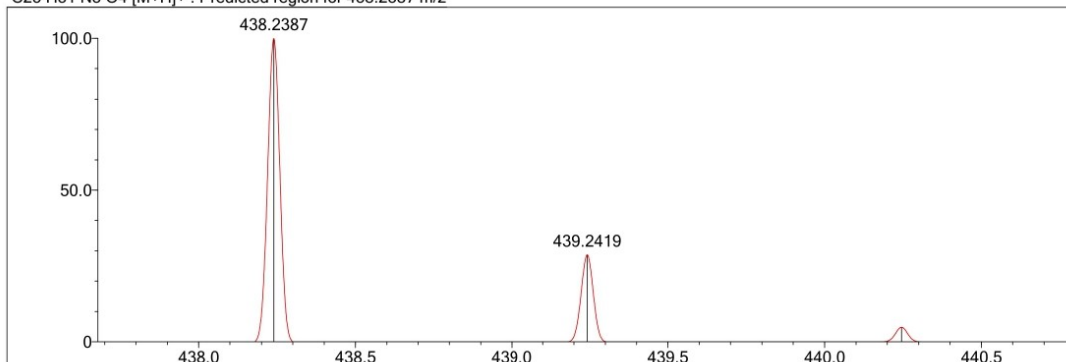

| Rank | Score | Formula (M)   | Ion    | Meas. m/z | Pred. m/z | Df. (mDa) | Df. (ppm) | Iso   | DBE  |
|------|-------|---------------|--------|-----------|-----------|-----------|-----------|-------|------|
| 1    | 87.09 | C25 H31 N3 O4 | [M+H]+ | 438.2386  | 438.2387  | -0.1      | -0.23     | 87.09 | 12.0 |

Figure S9. HRMS spectra of compound 4b

## ==== Shimadzu LCMSsolution Analysis Report ====

Acquired by : Admin  
Sample Name : AL-2  
Sample ID :  
Vial # : 2  
Injection Volume : 0.5 uL  
Data File Name : AL-2\_198.lcd  
Method File Name : isocratic\_serkan.lcm  
Batch File Name : batch.lcb  
Report File Name : DefaultLCMS.lcr  
Data Acquired : 02.08.2022 16:58:49  
Data Processed : 02.08.2022 17:08:52

## &lt;Chromatogram&gt;

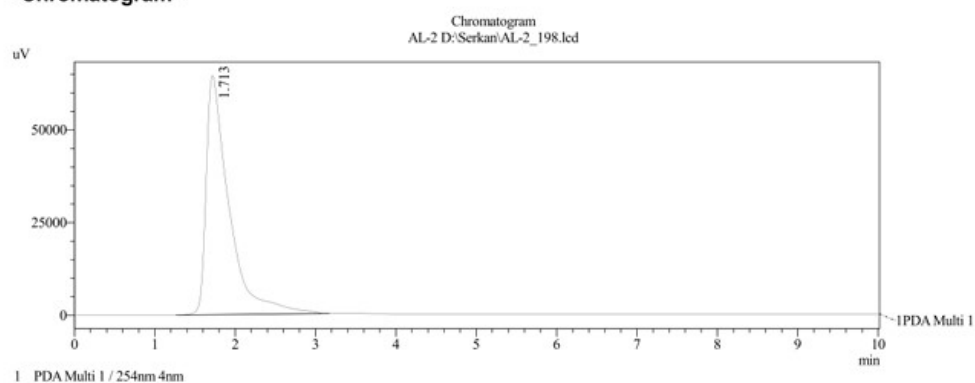

PeakTable

PDA Ch1 254nm 4nm

| Peak# | Ret. Time | Area    | Height | Area %  |
|-------|-----------|---------|--------|---------|
| 1     | 1.713     | 1279956 | 64535  | 100.000 |
| Total |           | 1279956 | 64535  | 100.000 |

Figure S10. HPLC chromatogram of compound **4b**

## DOPNALAB

| Item               | Value                                                                 |
|--------------------|-----------------------------------------------------------------------|
| Acquired Date&Time | 17.05.2023 14:58:49                                                   |
| Acquired by        | System Administrator                                                  |
| Filename           | C:\Users\dopnalab\Desktop\MASAÜSTÜ\derya\berkant\AL_serisi\AL-31.ispd |
| Spectrum name      | AL-31                                                                 |
| Sample name        | AL-3                                                                  |
| Sample ID          |                                                                       |
| Option             |                                                                       |
| Comment            |                                                                       |
| No. of Scans       | 15                                                                    |
| Resolution         | 4 [cm-1]                                                              |
| Apodization        | Happ-Genzel                                                           |

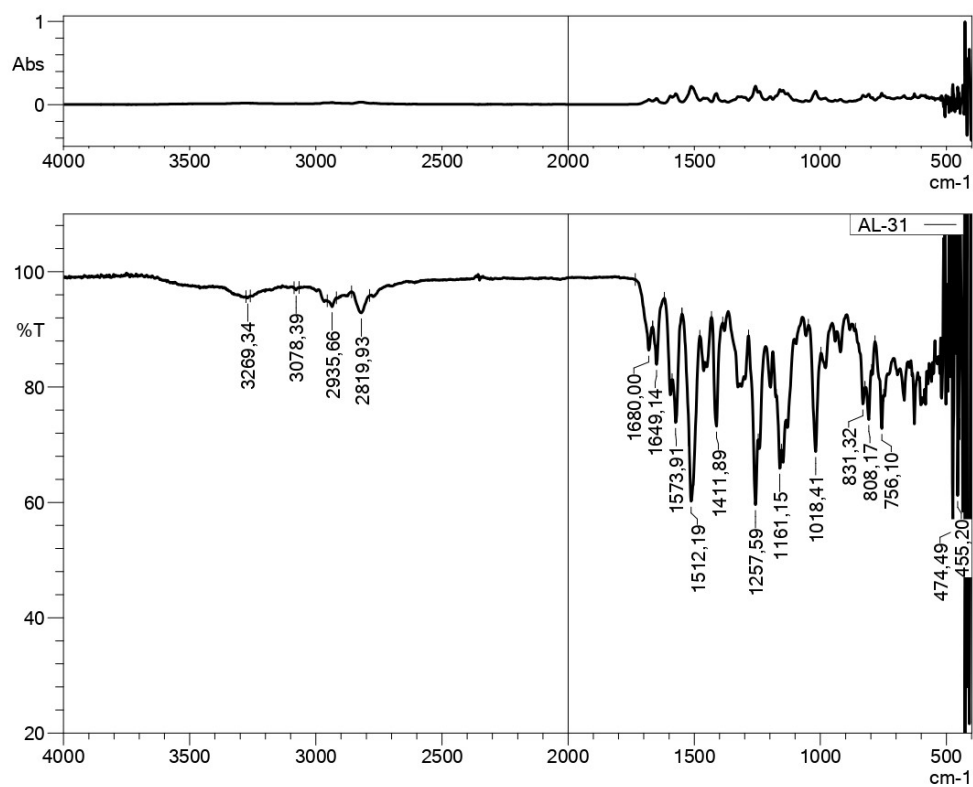

**Figure S11.** FTIR spectra of compound **4c**.

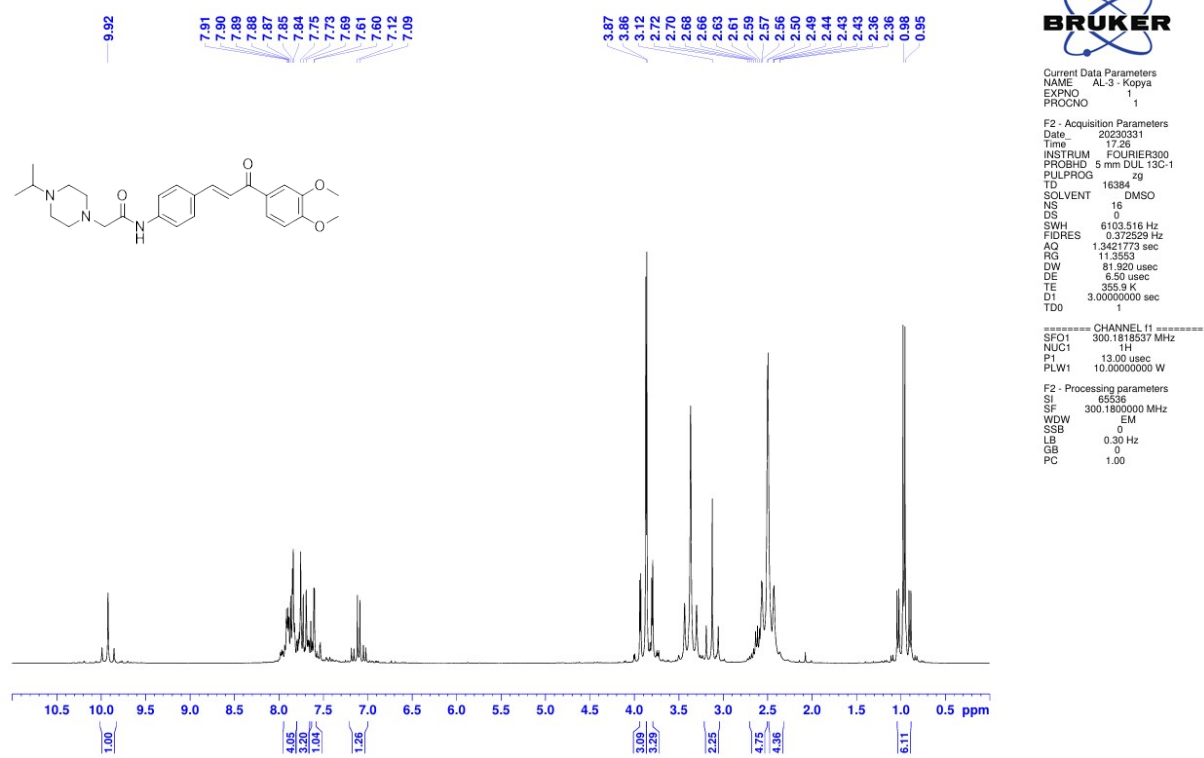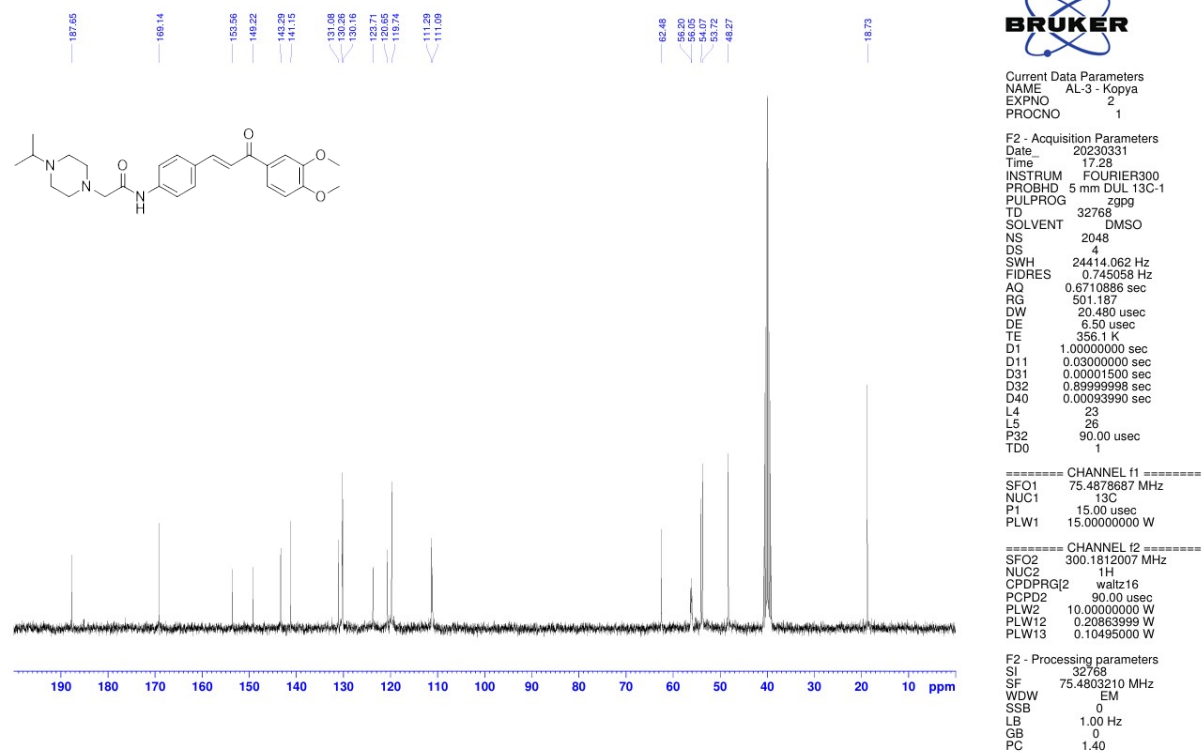

Data File: C:\LabSolutions\Data\Analiz\Serkan\AL-3\_199.lcd

| Elmt | Val. | Min | Max | Use Adduct |
|------|------|-----|-----|------|------|-----|-----|------|------|-----|-----|------|------|-----|-----|------------|
| H    | 1    | 0   | 35  | O    | 2    | 0   | 5   | Cl   | 1    | 0   | 0   | I    | 3    | 0   | 0   | H          |
| B    | 3    | 0   | 0   | F    | 1    | 0   | 0   | Br   | 1    | 0   | 0   |      |      |     |     |            |
| C    | 4    | 0   | 32  | P    | 3    | 0   | 0   | Ru   | 2    | 0   | 0   |      |      |     |     |            |
| N    | 3    | 0   | 5   | S    | 2    | 0   | 2   | Pd   | 2    | 0   | 0   |      |      |     |     |            |

Error Margin (ppm): 5

DBE Range: 5.0 - 25.0

Electron Ions: odd

HC Ratio: unlimited

Apply N Rule: yes

Use MSn Info: yes

Max Isotopes: 3

Isotope RI (%): 1.00

Isotope Res: 9000

MSn Iso RI (%): 10.00

MSn Logic Mode: AND

Max Results: 50

Event#: 1 MS(E+) Ret. Time : 1.933 Scan# : 291

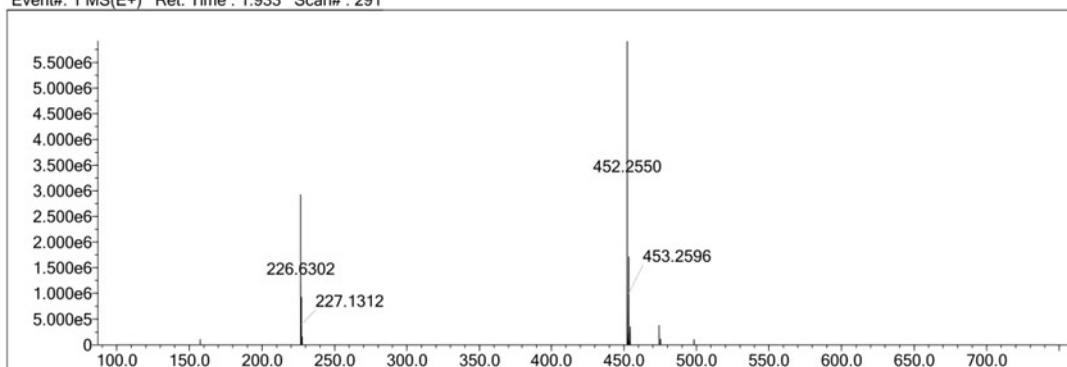

Measured region for 452.2550 m/z

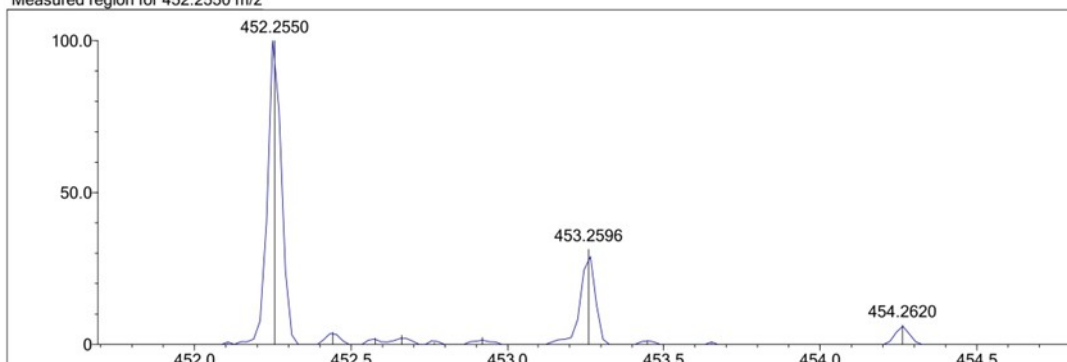C26 H33 N3 O4 [M+H]<sup>+</sup> : Predicted region for 452.2544 m/z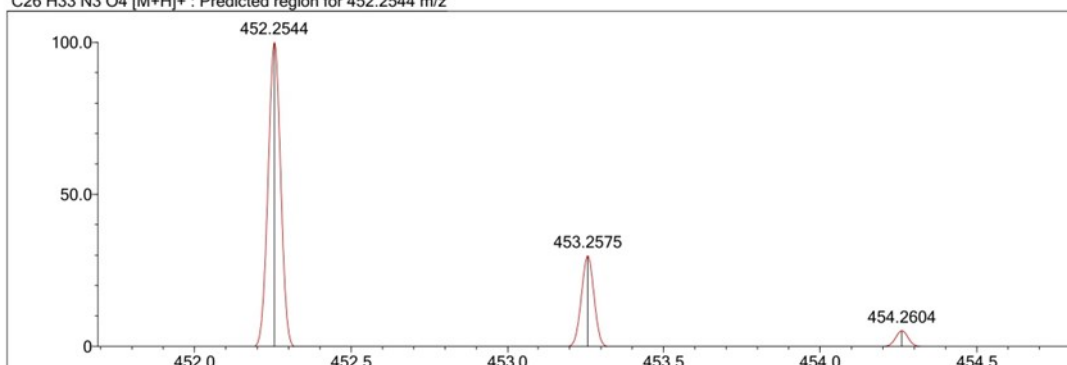

| Rank | Score | Formula (M)   | Ion                | Meas. m/z | Pred. m/z | Df. (mDa) | Df. (ppm) | Iso   | DBE  |
|------|-------|---------------|--------------------|-----------|-----------|-----------|-----------|-------|------|
| 1    | 87.25 | C26 H33 N3 O4 | [M+H] <sup>+</sup> | 452.2550  | 452.2544  | 0.6       | 1.33      | 87.98 | 12.0 |

Figure S14. HRMS spectra of compound **4c**



==== Shimadzu LCMSsolution Analysis Report ====

Acquired by : Admin  
Sample Name : AL-3  
Sample ID :  
Vial # : 3  
Injection Volume : 0.5 uL  
Data File Name : AL-3\_199.lcd  
Method File Name : isocratic\_serkan.lcm  
Batch File Name : batch.lcb  
Report File Name : DefaultLCMS.lcr  
Data Acquired : 02.08.2022 17:09:38  
Data Processed : 04.09.2025 10:37:24

<Chromatogram>

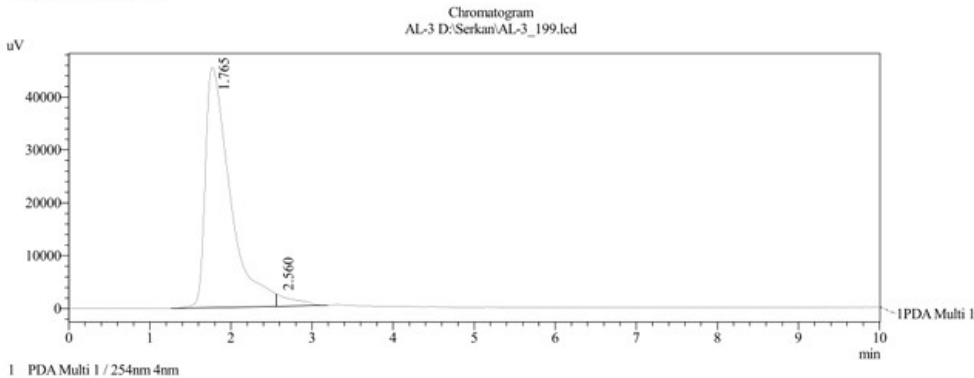

PeakTable

| Peak# | Ret. Time | Area    | Height | Area %  |
|-------|-----------|---------|--------|---------|
| 1     | 1.765     | 968164  | 45508  | 96.637  |
| 2     | 2.560     | 33693   | 2338   | 3.363   |
| Total |           | 1001857 | 47847  | 100.000 |

Figure S15. HPLC chromatogram of compound 4c

## DOPNALAB

| Item               | Value                                                               |
|--------------------|---------------------------------------------------------------------|
| Acquired Date&Time | 17.05.2023 15:05:12                                                 |
| Acquired by        | System Administrator                                                |
| Filename           | C:\Users\dopnalab\Desktop\MASAUSTU\derya\berkant\AL seri\AL-41.ispd |
| Spectrum name      | AL-41                                                               |
| Sample name        | AL-4                                                                |
| Sample ID          |                                                                     |
| Option             |                                                                     |
| Comment            |                                                                     |
| No. of Scans       | 15                                                                  |
| Resolution         | 4 [cm-1]                                                            |
| Apodization        | Happ-Genzel                                                         |

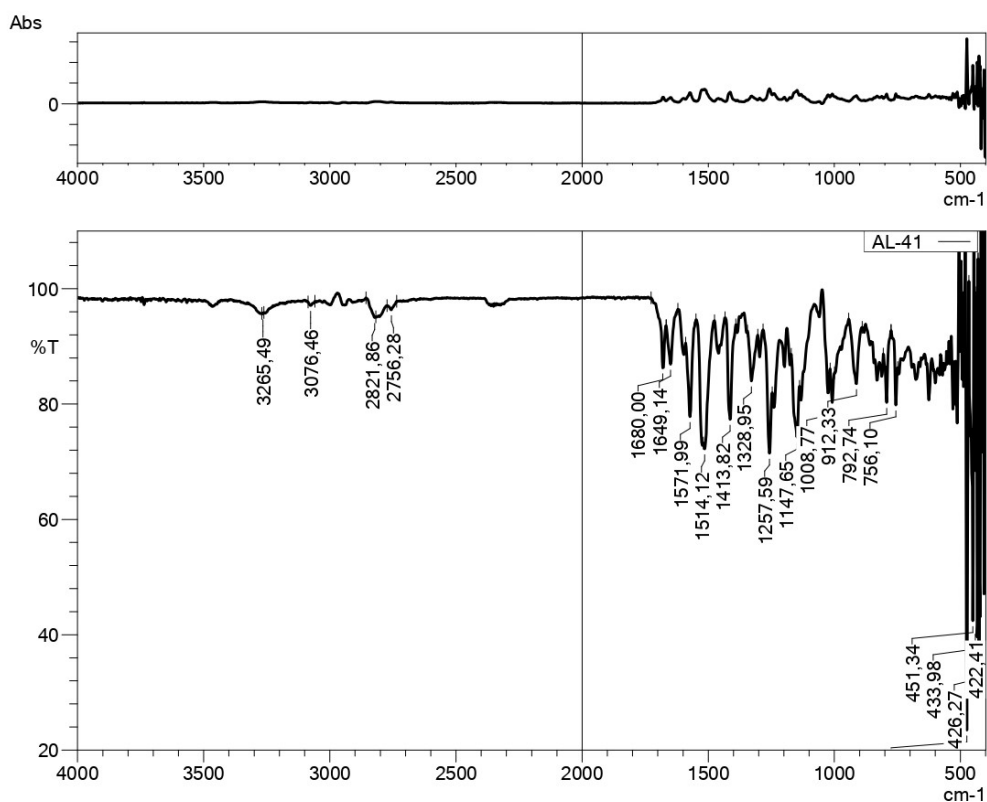

**Figure S16. FTIR spectra of compound 4d**

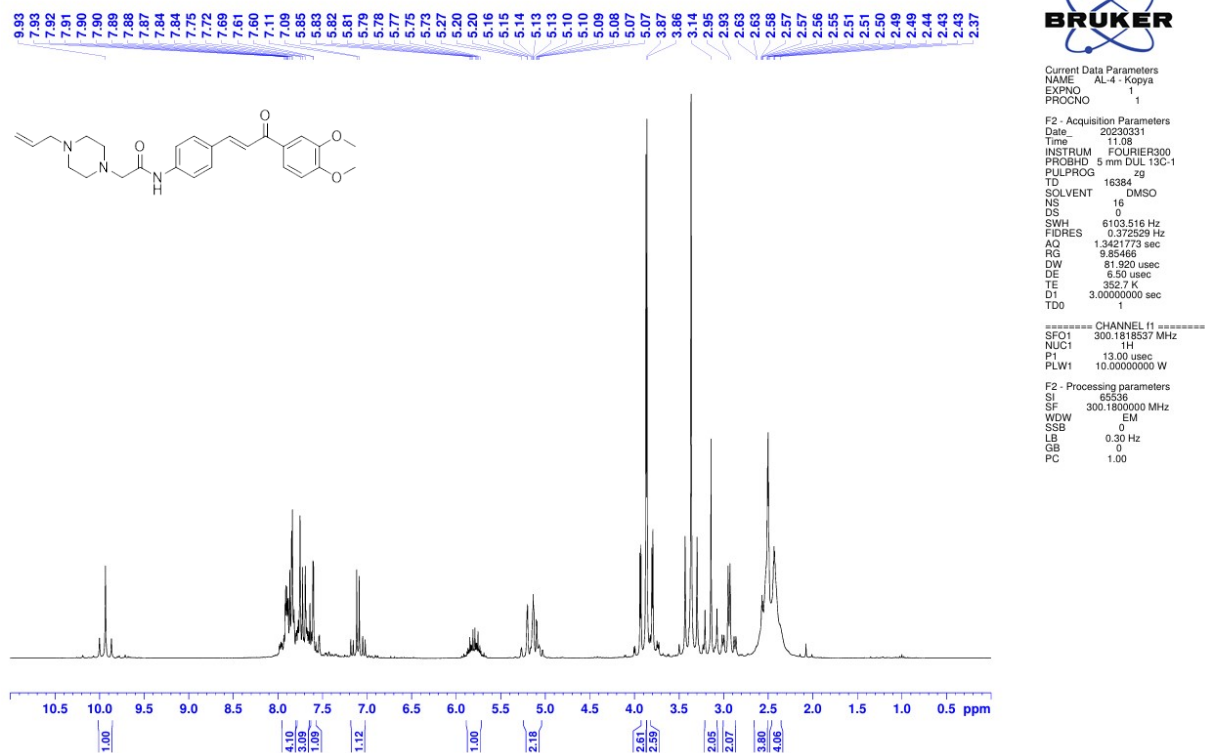

Figure S17. <sup>1</sup>H-NMR spectra of compound 4d

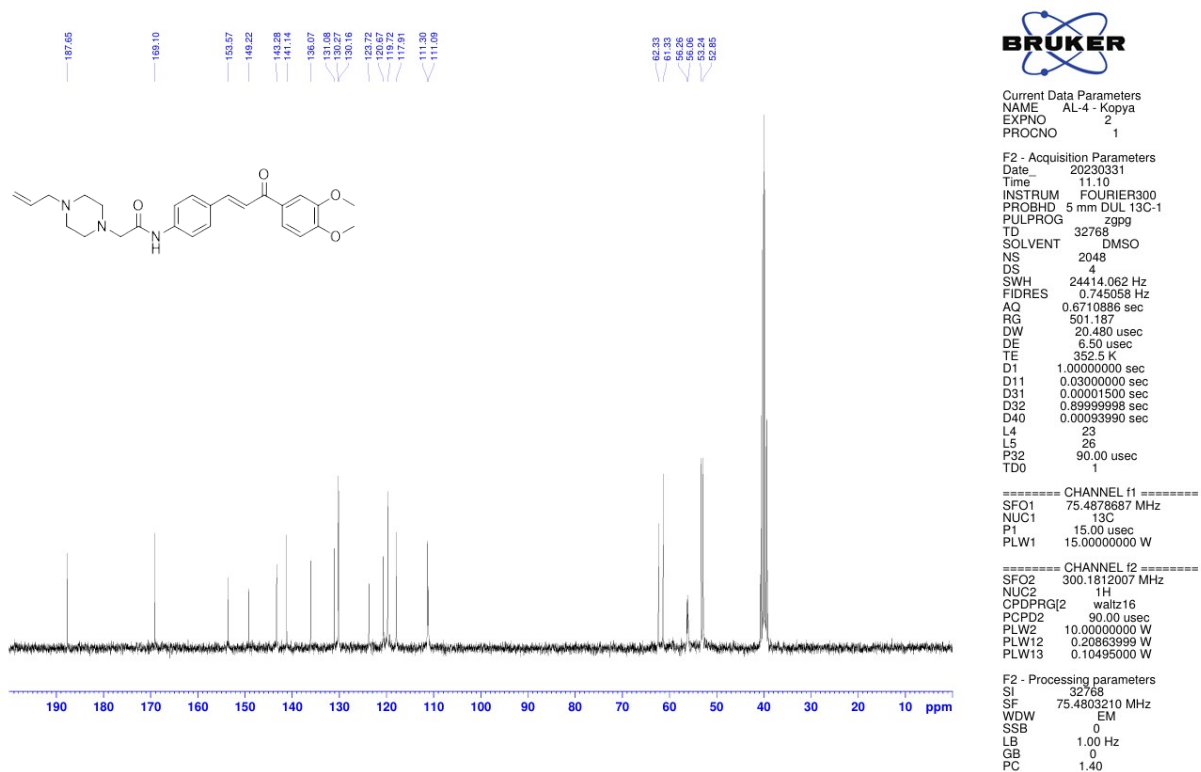

Figure S18. <sup>13</sup>C-NMR spectra of compound 4d

Data File: C:\LabSolutions\Data\Analiz\Serkan\AL-4\_200.lcd

| Elmt | Val. | Min | Max | Use Adduct |
|------|------|-----|-----|------|------|-----|-----|------|------|-----|-----|------|------|-----|-----|------------|
| H    | 1    | 0   | 35  | O    | 2    | 0   | 5   | Cl   | 1    | 0   | 0   | I    | 3    | 0   | 0   | H          |
| B    | 3    | 0   | 0   | F    | 1    | 0   | 0   | Br   | 1    | 0   | 0   |      |      |     |     |            |
| C    | 4    | 0   | 32  | P    | 3    | 0   | 0   | Ru   | 2    | 0   | 0   |      |      |     |     |            |
| N    | 3    | 0   | 5   | S    | 2    | 0   | 2   | Pd   | 2    | 0   | 0   |      |      |     |     |            |

Error Margin (ppm): 5

DBE Range: 5.0 - 25.0

Electron Ions: odd

HC Ratio: unlimited

Apply N Rule: yes

Use MSn Info: yes

Max Isotopes: 3

Isotope RI (%): 1.00

Isotope Res: 9000

MSn Iso RI (%): 10.00

MSn Logic Mode: AND

Max Results: 50

Event#: 1 MS(E+) Ret. Time : 1.733 Scan# : 261

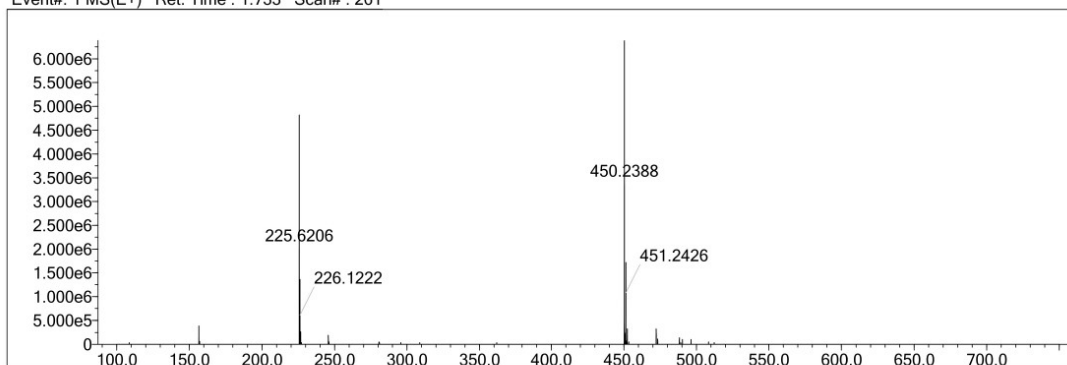

Measured region for 450.2388 m/z

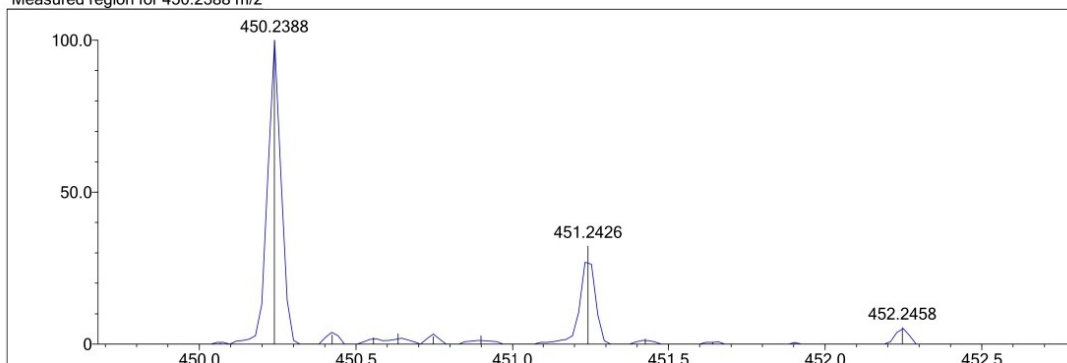C26 H31 N3 O4 [M+H]<sup>+</sup> : Predicted region for 450.2387 m/z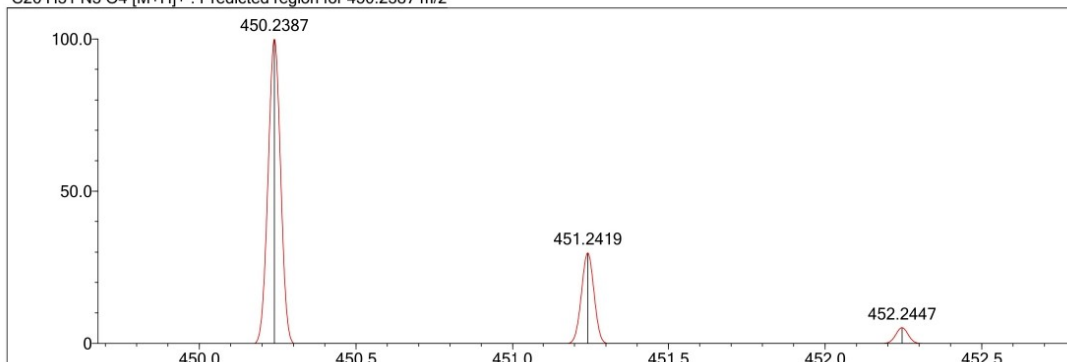

| Rank | Score  | Formula (M)   | Ion                | Meas. m/z | Pred. m/z | Df. (mDa) | Df. (ppm) | Iso    | DBE  |
|------|--------|---------------|--------------------|-----------|-----------|-----------|-----------|--------|------|
| 1    | 100.00 | C26 H31 N3 O4 | [M+H] <sup>+</sup> | 450.2388  | 450.2387  | 0.1       | 0.22      | 100.00 | 13.0 |

Figure S19. HRMS spectra of compound **4d**

# ==== Shimadzu LCMSsolution Analysis Report ====

Acquired by : Admin  
 Sample Name : AL-11  
 Sample ID :  
 Vial # : 4  
 Injection Volume : 1 uL  
 Data File Name : AL-11\_7.lcd  
 Method File Name : isocratic\_serkan-15DK.lcm  
 Batch File Name : 1.lcb  
 Report File Name : DefaultLCMS.lcr  
 Data Acquired : 02.08.2022 18:36:08  
 Data Processed : 08.09.2025 10:00:48

## <Chromatogram>

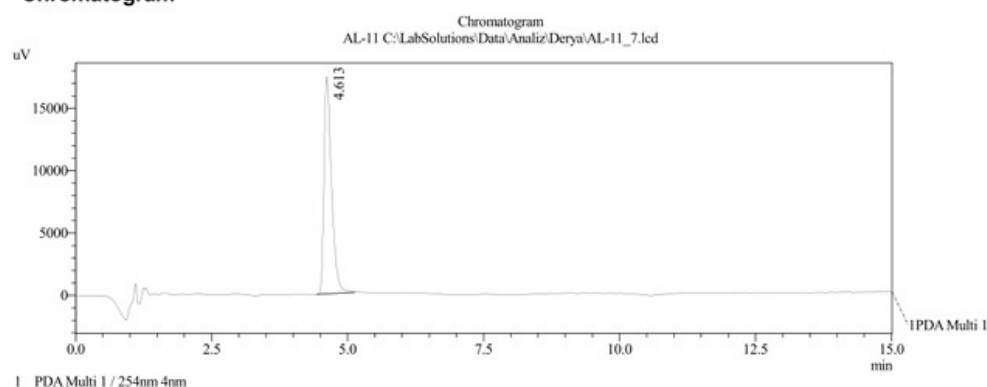

PeakTable

| Peak# | Ret. Time | Area   | Height | Area %  |
|-------|-----------|--------|--------|---------|
| 1     | 4.613     | 167372 | 17415  | 100.000 |
| Total |           | 167372 | 17415  | 100.000 |

**Figure S20.** HPLC chromatogram of compound **4d**

## DOPNALAB

| Item               | Value                                                                 |
|--------------------|-----------------------------------------------------------------------|
| Acquired Date&Time | 17.05.2023 15:10:38                                                   |
| Acquired by        | System Administrator                                                  |
| Filename           | C:\Users\dopnalab\Desktop\MASAÜSTÜ\derya\berkant\AL_serisi\AL-51.ispd |
| Spectrum name      | AL-51                                                                 |
| Sample name        | AL-5                                                                  |
| Sample ID          |                                                                       |
| Option             |                                                                       |
| Comment            |                                                                       |
| No. of Scans       | 15                                                                    |
| Resolution         | 4 [cm-1]                                                              |
| Apodization        | Happ-Genzel                                                           |

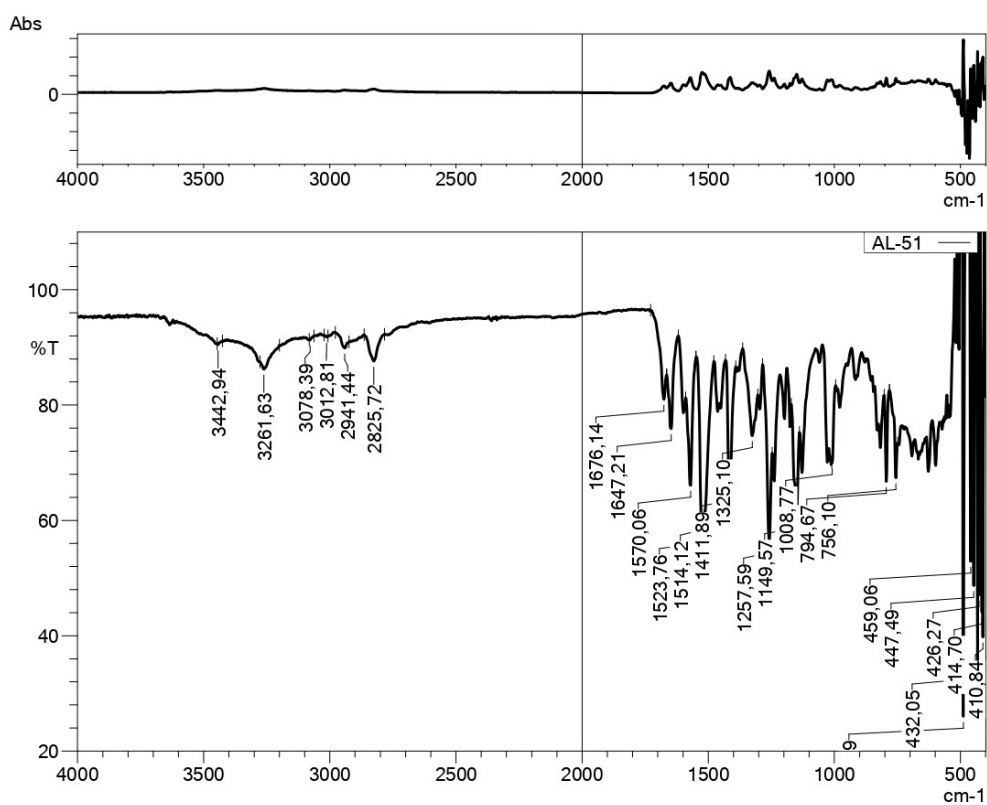

**Figure S21.** FTIR spectra of compound **4e**

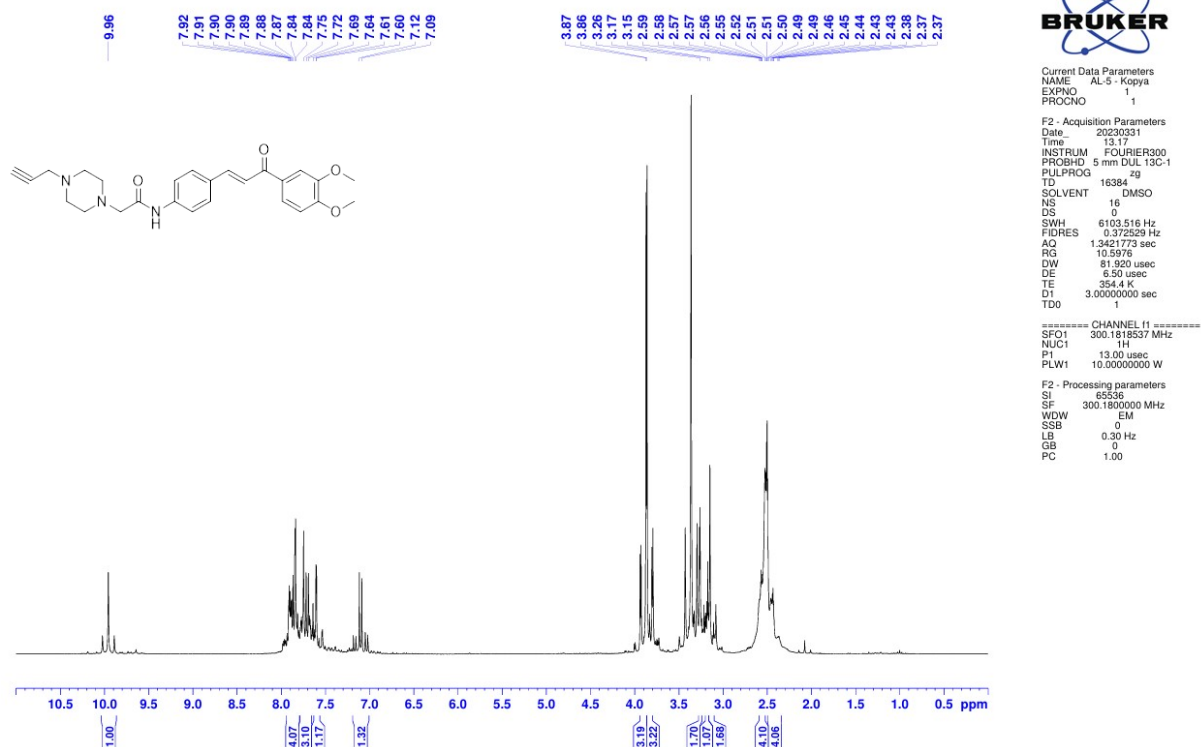

Figure S22. <sup>1</sup>H-NMR spectra of compound 4e

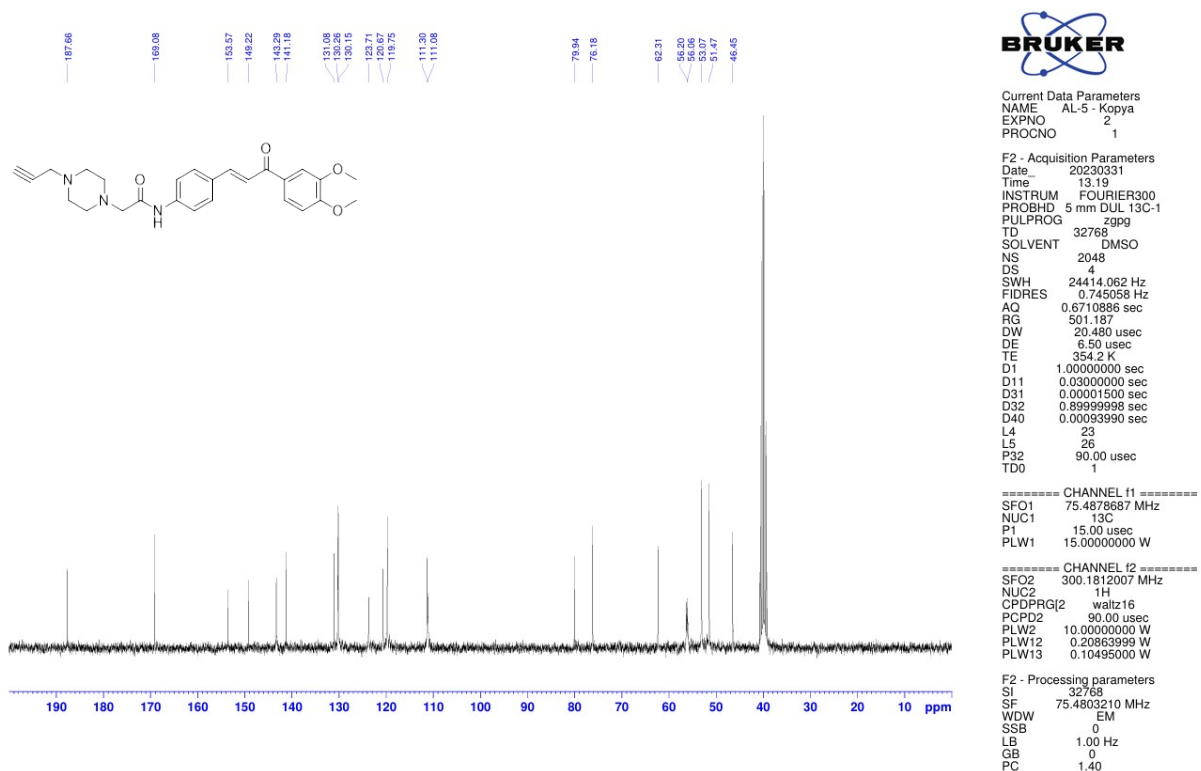

Figure S23. <sup>13</sup>C-NMR spectra of compound 4e

Data File: C:\LabSolutions\Data\Analiz\Serkan\AL-5\_201.lcd

| Elmt | Val. | Min | Max | Use Adduct |
|------|------|-----|-----|------|------|-----|-----|------|------|-----|-----|------|------|-----|-----|------------|
| H    | 1    | 0   | 35  | O    | 2    | 0   | 5   | Cl   | 1    | 0   | 0   | I    | 3    | 0   | 0   | H          |
| B    | 3    | 0   | 0   | F    | 1    | 0   | 0   | Br   | 1    | 0   | 0   |      |      |     |     |            |
| C    | 4    | 0   | 32  | P    | 3    | 0   | 0   | Ru   | 2    | 0   | 0   |      |      |     |     |            |
| N    | 3    | 0   | 5   | S    | 2    | 0   | 2   | Pd   | 2    | 0   | 0   |      |      |     |     |            |

Error Margin (ppm): 5

HC Ratio: unlimited

Max Isotopes: 3

MSn Iso RI (%): 10.00

DBE Range: 5.0 - 25.0

Apply N Rule: yes

Isotope RI (%): 1.00

MSn Logic Mode: AND

Electron Ions: odd

Use MSn Info: yes

Isotope Res: 9000

Max Results: 50

Event#: 1 MS(E+) Ret. Time : 2.027 Scan# : 305

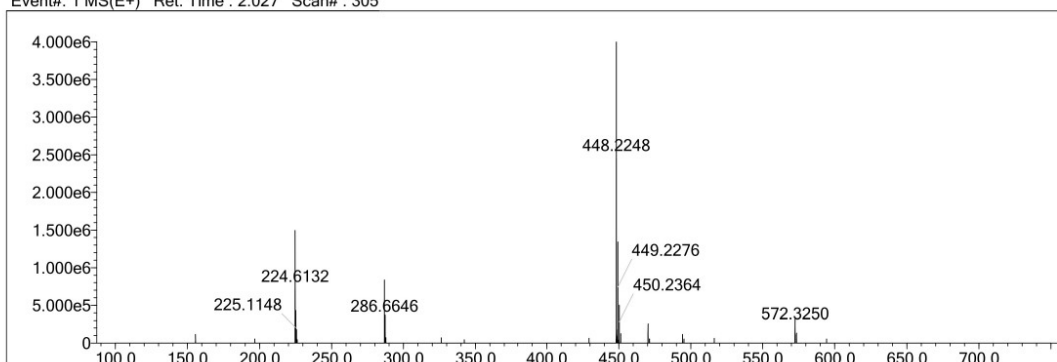

Measured region for 448.2248 m/z

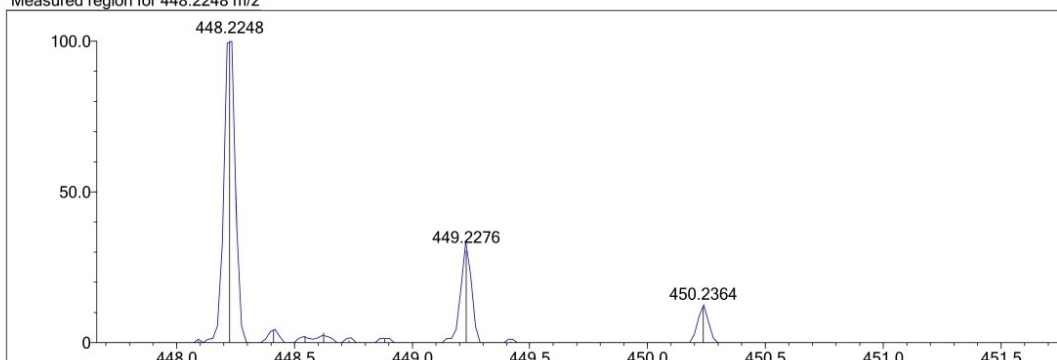C26 H29 N3 O4 [M+H]<sup>+</sup> : Predicted region for 448.2231 m/z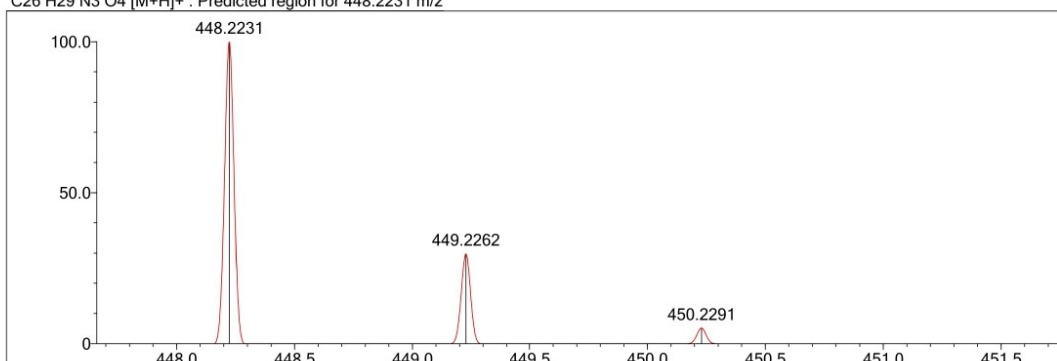

| Rank | Score | Formula (M)   | Ion                | Meas. m/z | Pred. m/z | Df. (mDa) | Df. (ppm) | Iso   | DBE  |
|------|-------|---------------|--------------------|-----------|-----------|-----------|-----------|-------|------|
| 2    | 60.88 | C26 H29 N3 O4 | [M+H] <sup>+</sup> | 448.2248  | 448.2231  | 1.7       | 3.79      | 65.44 | 14.0 |

Figure S24. HRMS spectra of compound 4e



# ==== Shimadzu LCMSsolution Analysis Report ====

Acquired by : Admin  
 Sample Name : AL-5  
 Sample ID :  
 Vial # : 5  
 Injection Volume : 0.5 uL  
 Data File Name : AL-5\_201.lcd  
 Method File Name : isocratic\_serkan.lcm  
 Batch File Name : batch.lcb  
 Report File Name : DefaultLCMS.lcr  
 Data Acquired : 02.08.2022 17:31:20  
 Data Processed : 02.08.2022 17:41:22

## <Chromatogram>

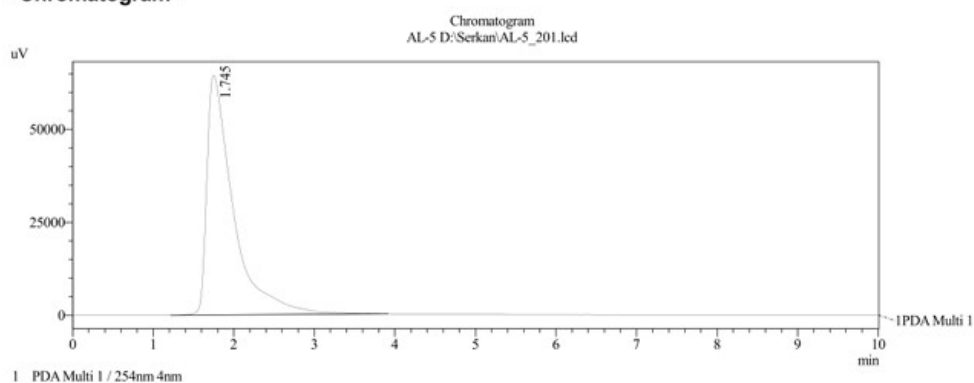

PeakTable

| Peak# | Ret. Time | Area    | Height | Area %  |
|-------|-----------|---------|--------|---------|
| 1     | 1.745     | 1480377 | 64508  | 100.000 |
| Total |           | 1480377 | 64508  | 100.000 |

**Figure 25.** HPLC chromatogram of compound **4e**

## DOPNALAB

| Item               | Value                                                                 |
|--------------------|-----------------------------------------------------------------------|
| Acquired Date&Time | 17.05.2023 15:25:31                                                   |
| Acquired by        | System Administrator                                                  |
| Filename           | C:\Users\dopnalab\Desktop\MASAÜSTÜ\derya\berkant\AL_serisi\AL-61.ispd |
| Spectrum name      | AL-61                                                                 |
| Sample name        | AL-6                                                                  |
| Sample ID          |                                                                       |
| Option             |                                                                       |
| Comment            |                                                                       |
| No. of Scans       | 15                                                                    |
| Resolution         | 4 [cm-1]                                                              |
| Apodization        | Happ-Genzel                                                           |

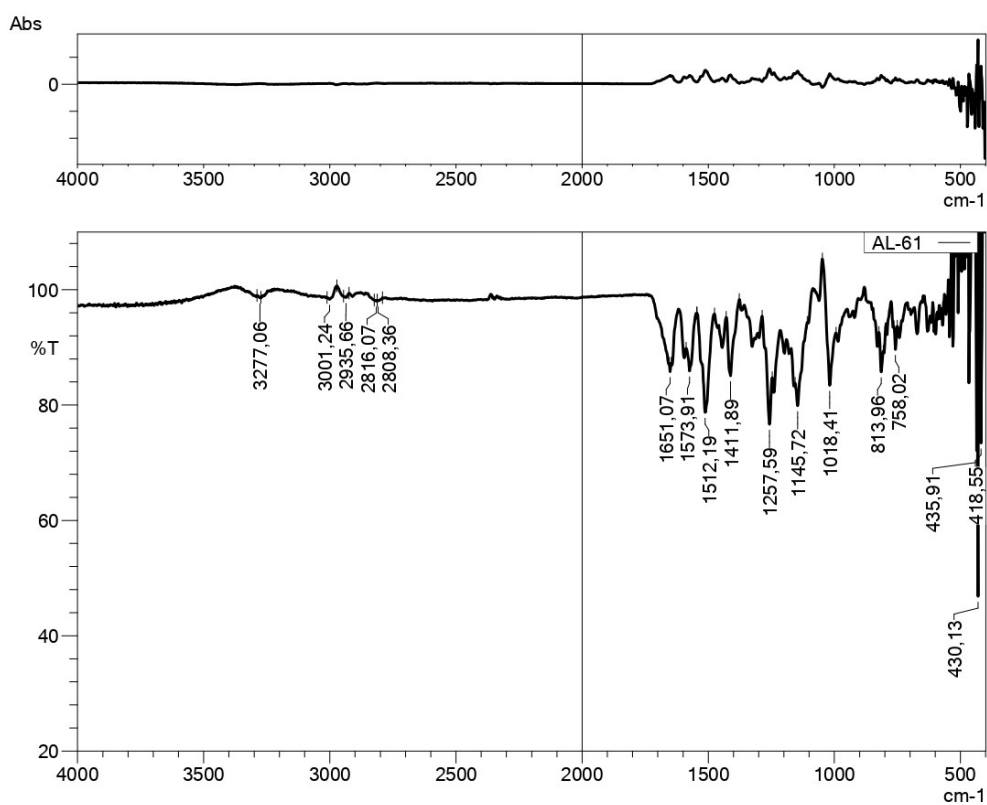

**Figure S26.** FTIR spectra of compound **4f**

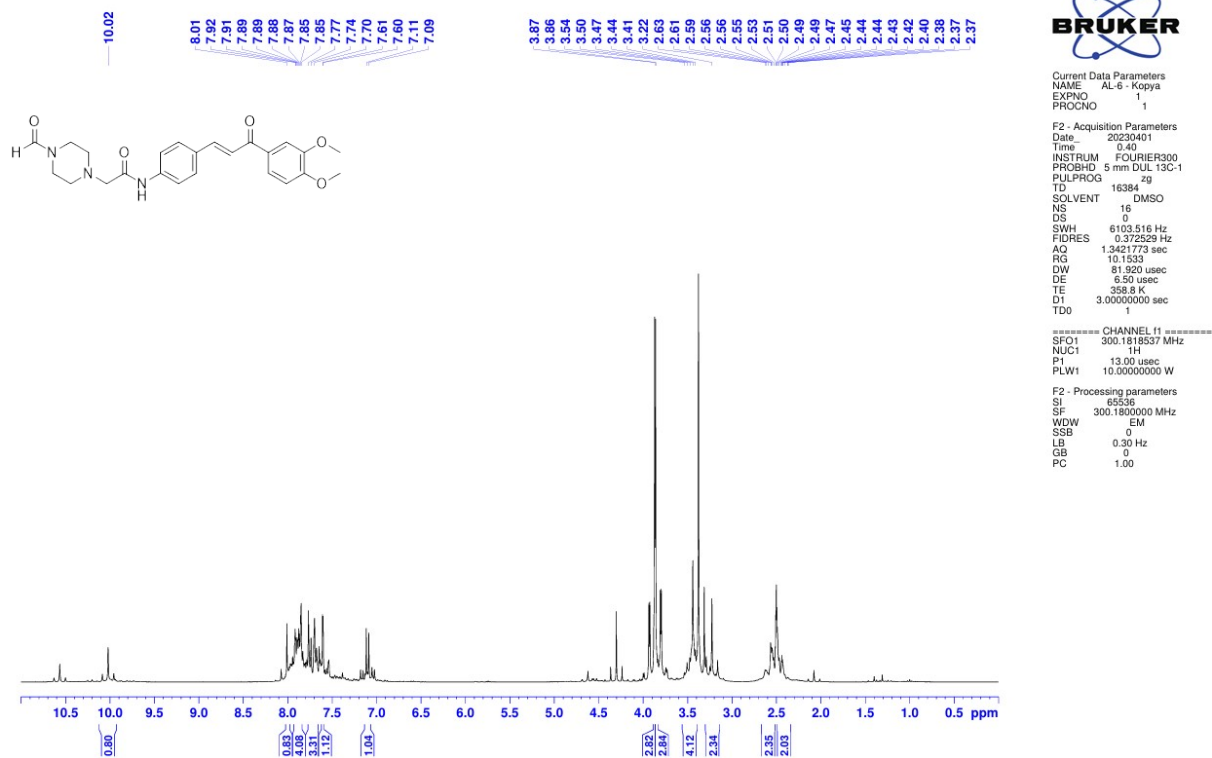

Figure S27. <sup>1</sup>H-NMR spectra of compound 4f

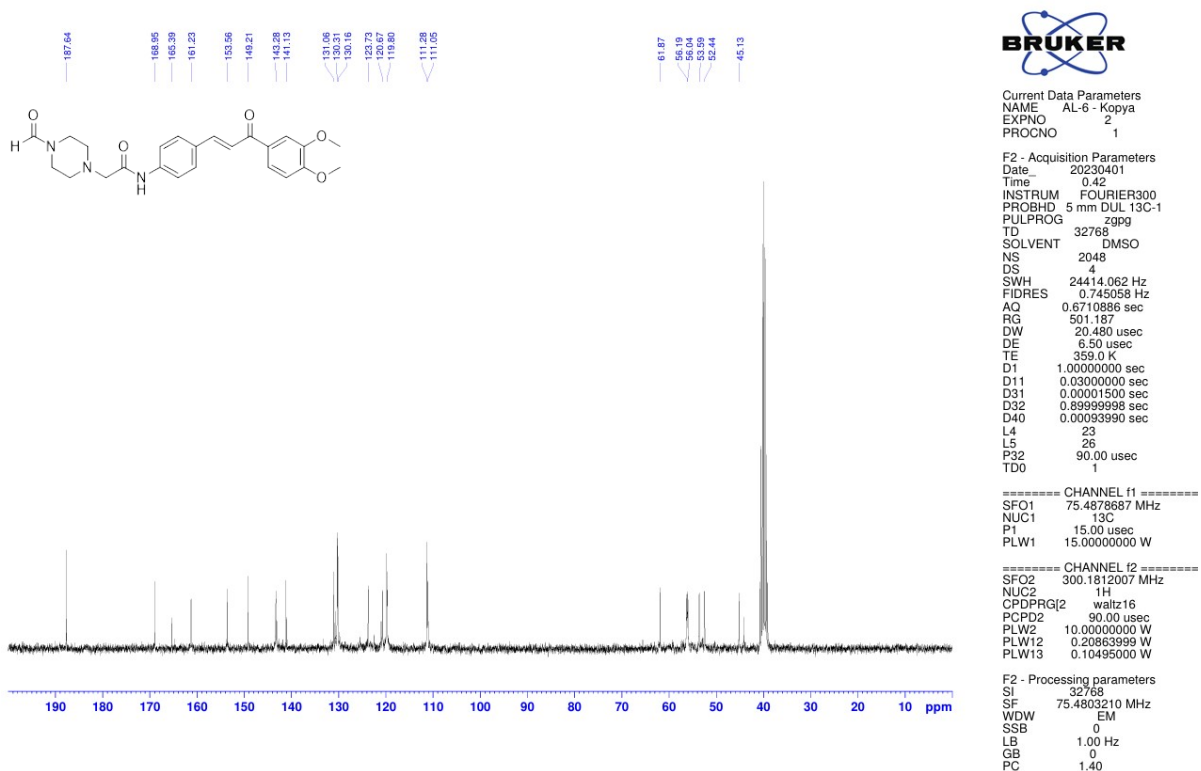

Figure S28. <sup>13</sup>C-NMR spectra of compound 4f

Data File: C:\LabSolutions\Data\Analiz\Serkan\AL-6\_202.lcd

| Elmt | Val. | Min | Max | Use Adduct |
|------|------|-----|-----|------|------|-----|-----|------|------|-----|-----|------|------|-----|-----|------------|
| H    | 1    | 0   | 30  | O    | 2    | 0   | 5   | Cl   | 1    | 0   | 0   | I    | 3    | 0   | 0   | H          |
| B    | 3    | 0   | 0   | F    | 1    | 0   | 0   | Br   | 1    | 0   | 0   |      |      |     |     |            |
| C    | 4    | 0   | 32  | P    | 3    | 0   | 0   | Ru   | 2    | 0   | 0   |      |      |     |     |            |
| N    | 3    | 0   | 5   | S    | 2    | 0   | 2   | Pd   | 2    | 0   | 0   |      |      |     |     |            |

Error Margin (ppm): 5

DBE Range: 5.0 - 25.0

Electron Ions: odd

HC Ratio: unlimited

Apply N Rule: yes

Use MSn Info: yes

Max Isotopes: 3

Isotope RI (%): 1.00

Isotope Res: 9000

MSn Iso RI (%): 10.00

MSn Logic Mode: AND

Max Results: 50

Event#: 1 MS(E+) Ret. Time : 1.907 Scan# : 287

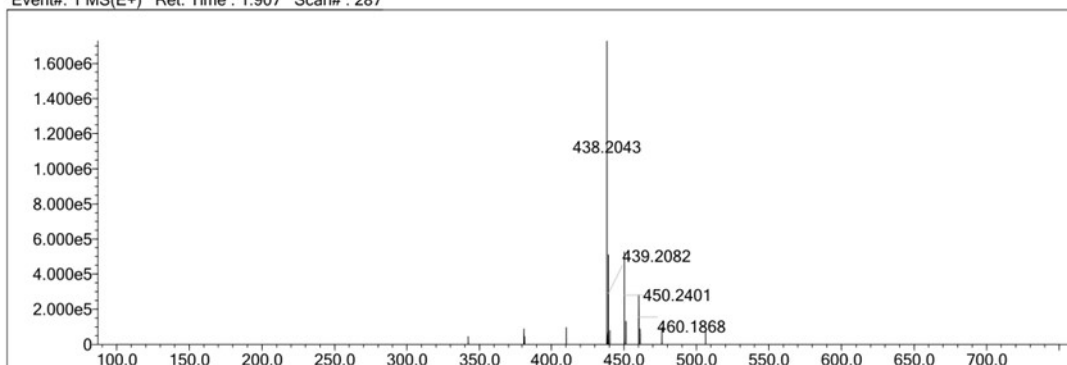

Measured region for 438.2043 m/z

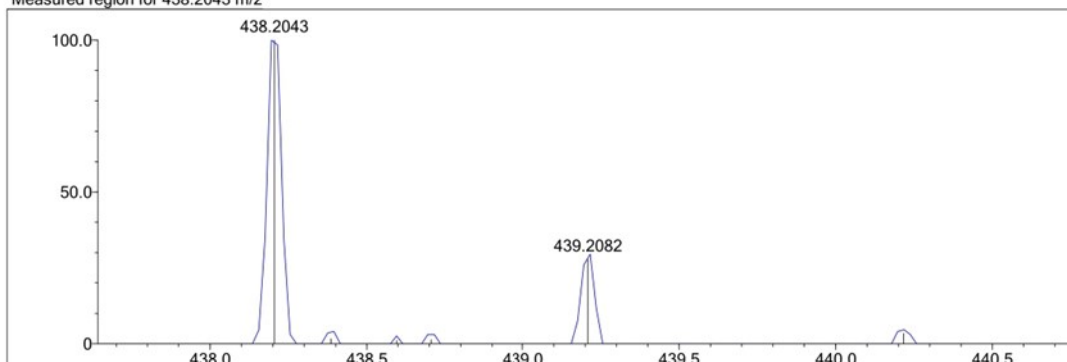C24 H27 N3 O5 [M+H]<sup>+</sup> : Predicted region for 438.2023 m/z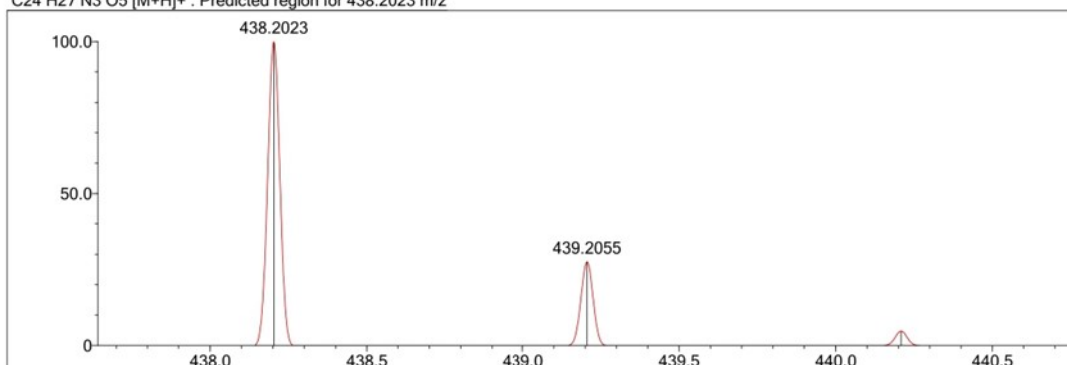

| Rank | Score | Formula (M)   | Ion                | Meas. m/z | Pred. m/z | Df. (mDa) | Df. (ppm) | Iso   | DBE  |
|------|-------|---------------|--------------------|-----------|-----------|-----------|-----------|-------|------|
| 2    | 78.70 | C24 H27 N3 O5 | [M+H] <sup>+</sup> | 438.2043  | 438.2023  | 2.0       | 4.56      | 86.39 | 13.0 |

Figure S29. HRMS spectra of compound 4f

==== Shimadzu LCMSsolution Analysis Report ====

Acquired by : Admin  
Sample Name : AL-6  
Sample ID :  
Vail # : 6  
Injection Volume : 1 uL  
Data File Name : AL-6\_202.lcd  
Method File Name : isocratic\_serkan-15DK.lcm  
Batch File Name : 1.lcb  
Report File Name : DefaultLCMS.lcr  
Data Acquired : 02.08.2022 17:42:05  
Data Processed : 08.09.2025 13:28:08

<Chromatogram>

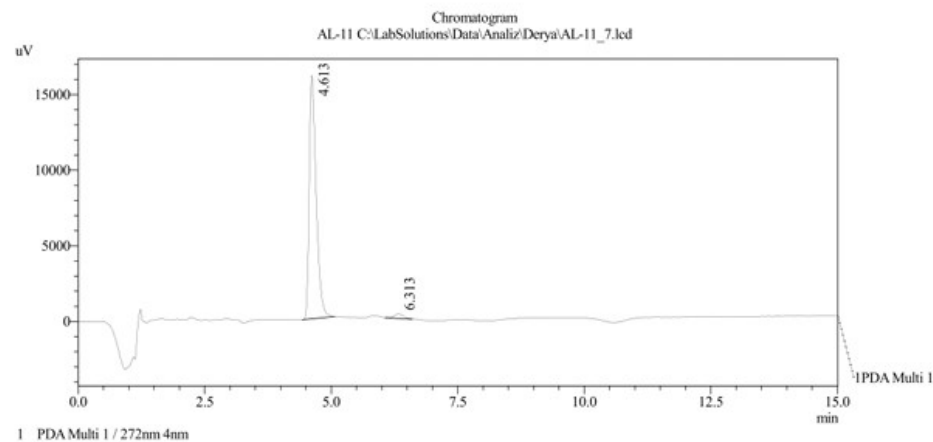

PeakTable

| Peak# | Ret. Time | Area   | Height | Area %  |
|-------|-----------|--------|--------|---------|
| 1     | 4.613     | 154083 | 16100  | 97.584  |
| 2     | 6.313     | 3815   | 289    | 2.416   |
| Total |           | 157898 | 16389  | 100.000 |

Figure S30. HPLC chromatogram of compound 4f

## DOPNALAB

| Item               | Value                                                               |
|--------------------|---------------------------------------------------------------------|
| Acquired Date&Time | 17.05.2023 15:31:40                                                 |
| Acquired by        | System Administrator                                                |
| Filename           | C:\Users\dopnalab\Desktop\MASAÜSTÜ\derya\berkant\AL seri\AL-71.ispd |
| Spectrum name      | AL-71                                                               |
| Sample name        | AL-7                                                                |
| Sample ID          |                                                                     |
| Option             |                                                                     |
| Comment            |                                                                     |
| No. of Scans       | 15                                                                  |
| Resolution         | 4 [cm-1]                                                            |
| Apodization        | Happ-Genzel                                                         |

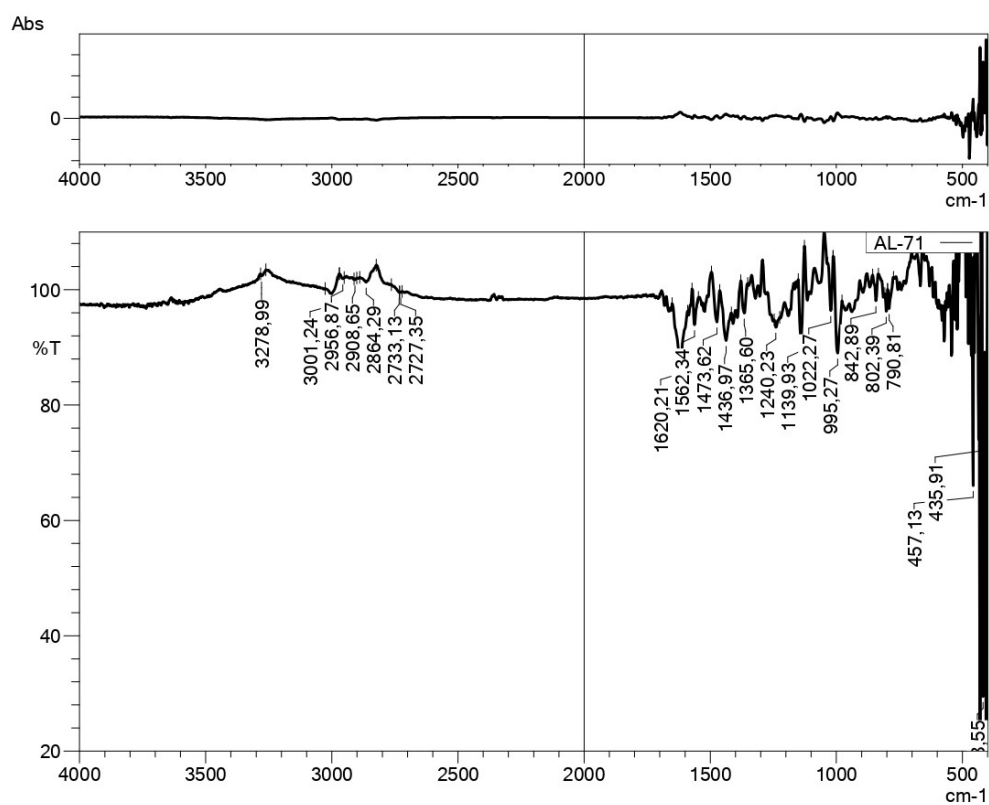

**Figure S31.** FTIR spectra of compound **4g**

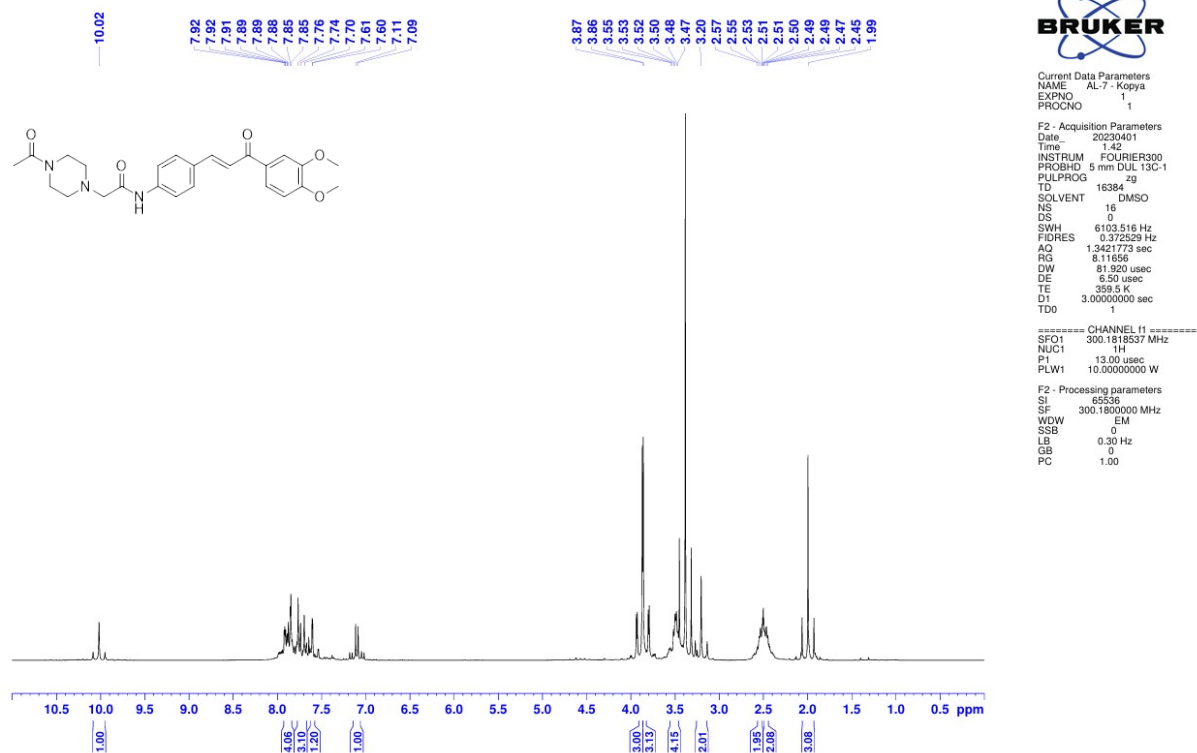

Figure S32. <sup>1</sup>H-NMR spectra of compound 4g

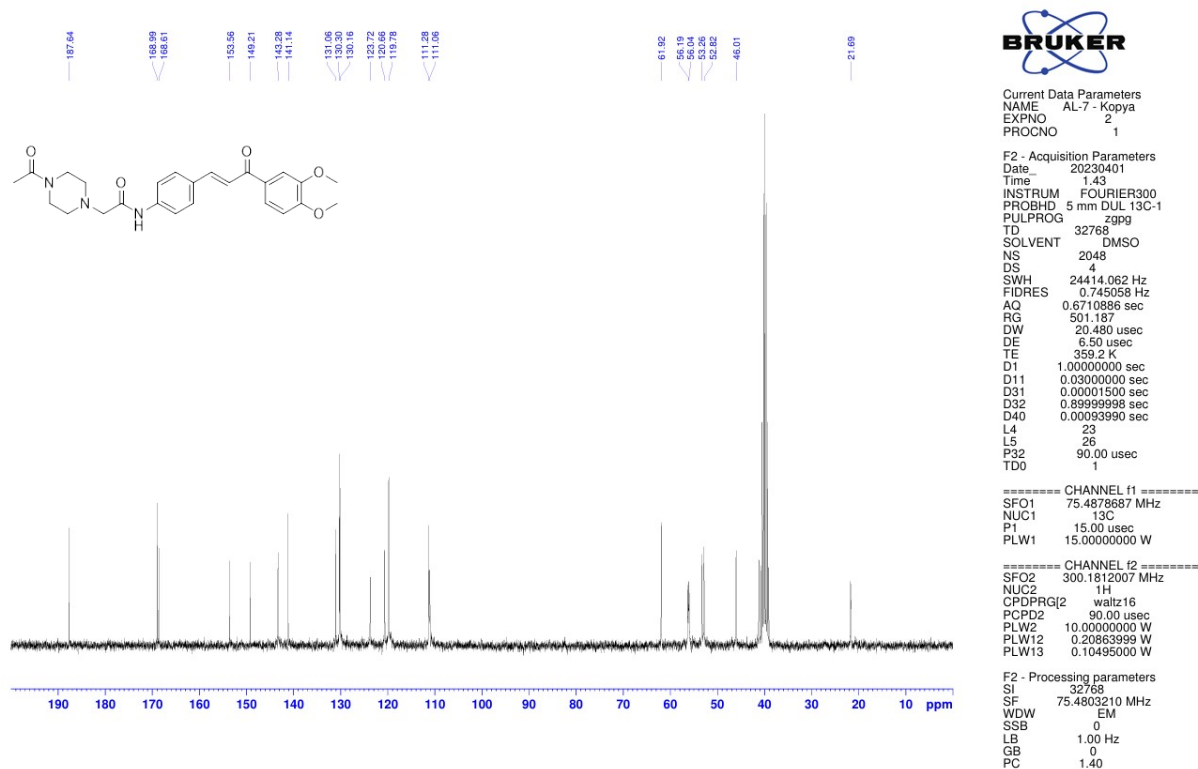

Figure S33. <sup>13</sup>C-NMR spectra of compound 4g

Data File: C:\LabSolutions\Data\Analiz\Serkan\AL-7\_203.lcd

| Elmt | Val. | Min | Max | Use Adduct |
|------|------|-----|-----|------|------|-----|-----|------|------|-----|-----|------|------|-----|-----|------------|
| H    | 1    | 0   | 30  | O    | 2    | 0   | 5   | Cl   | 1    | 0   | 0   | I    | 3    | 0   | 0   | H          |
| B    | 3    | 0   | 0   | F    | 1    | 0   | 0   | Br   | 1    | 0   | 0   |      |      |     |     |            |
| C    | 4    | 0   | 32  | P    | 3    | 0   | 0   | Ru   | 2    | 0   | 0   |      |      |     |     |            |
| N    | 3    | 0   | 5   | S    | 2    | 0   | 2   | Pd   | 2    | 0   | 0   |      |      |     |     |            |

Error Margin (ppm): 5

DBE Range: 5.0 - 25.0

Electron Ions: odd

HC Ratio: unlimited

Apply N Rule: yes

Use MSn Info: yes

Max Isotopes: 3

Isotope RI (%): 1.00

Isotope Res: 9000

MSn Iso RI (%): 10.00

MSn Logic Mode: AND

Max Results: 50

Event#: 1 MS(E+) Ret. Time : 1.720 Scan# : 259

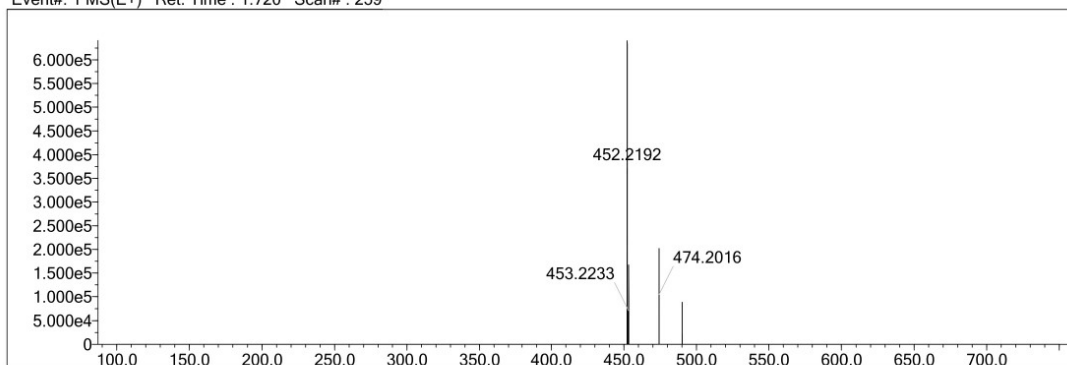

Measured region for 452.2192 m/z

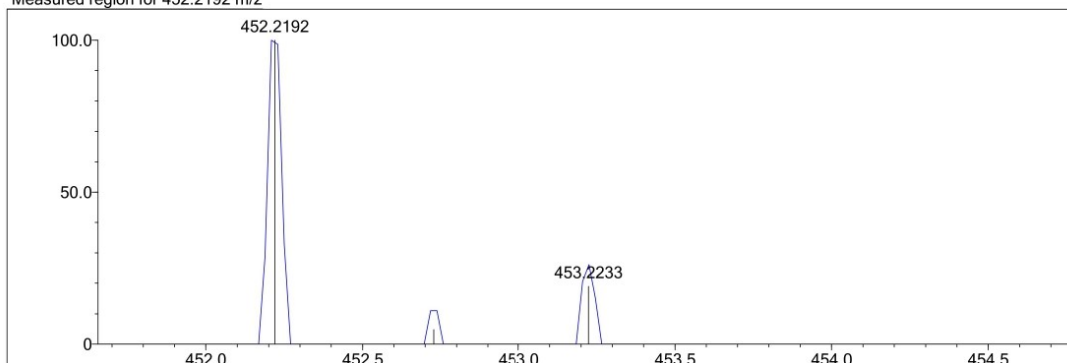C25 H29 N3 O5 [M+H]<sup>+</sup> : Predicted region for 452.2180 m/z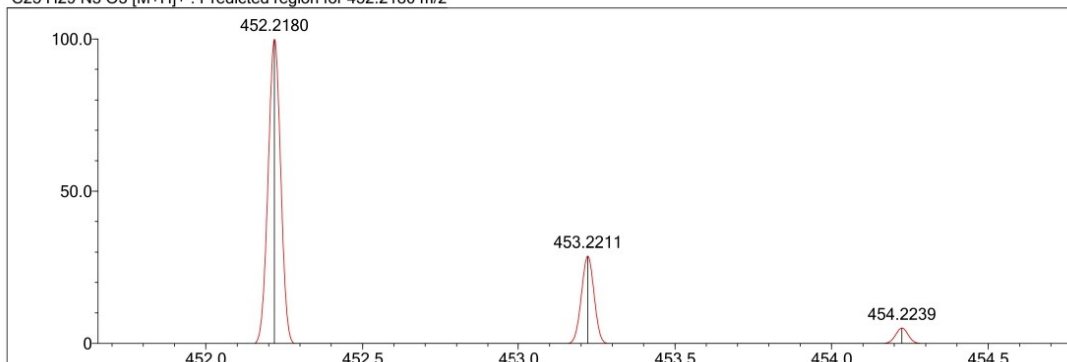

| Rank | Score | Formula (M)   | Ion                | Meas. m/z | Pred. m/z | Df. (mDa) | Df. (ppm) | Iso   | DBE  |
|------|-------|---------------|--------------------|-----------|-----------|-----------|-----------|-------|------|
| 1    | 85.47 | C25 H29 N3 O5 | [M+H] <sup>+</sup> | 452.2192  | 452.2180  | 1.2       | 2.65      | 89.15 | 13.0 |

Figure S34. HRMS spectra of compound 4g



# ==== Shimadzu LCMSsolution Analysis Report ====

Acquired by : Admin  
 Sample Name : AL-7  
 Sample ID :  
 Vial # : 7  
 Injection Volume : 0.5 uL  
 Data File Name : AL-7\_203.lcd  
 Method File Name : isocratic\_serkan.lcm  
 Batch File Name : batch.lcb  
 Report File Name : DefaultLCMS.lcr  
 Data Acquired : 02.08.2022 17:52:52  
 Data Processed : 04.09.2025 10:55:36

## <Chromatogram>

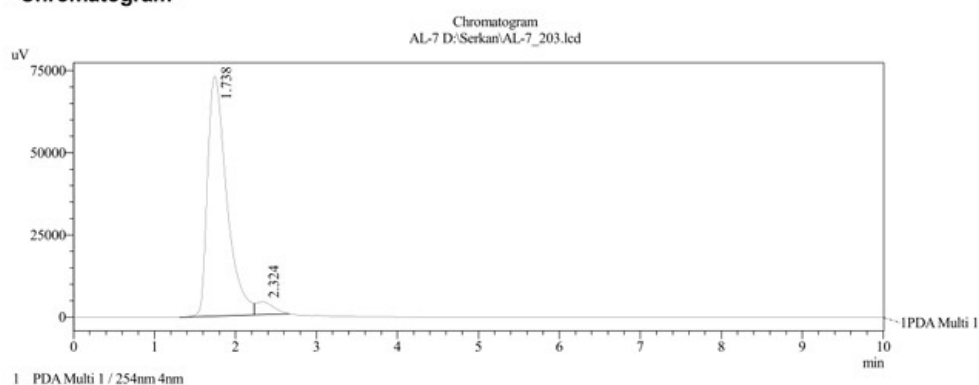

PeakTable

| Peak# | Ret. Time | Area    | Height | Area %  |
|-------|-----------|---------|--------|---------|
| 1     | 1.738     | 1202534 | 72994  | 95.322  |
| 2     | 2.324     | 59018   | 3885   | 4.678   |
| Total |           | 1261551 | 76879  | 100.000 |

**Figure S35.** HPLC chromatogram of compound **4g**

## DOPNALAB

| Item               | Value                                                                 |
|--------------------|-----------------------------------------------------------------------|
| Acquired Date&Time | 17.05.2023 15:37:31                                                   |
| Acquired by        | System Administrator                                                  |
| Filename           | C:\Users\dopnalab\Desktop\MASAÜSTÜ\derya\berkant\AL_serisi\AL-81.ispd |
| Spectrum name      | AL-81                                                                 |
| Sample name        | AL-8                                                                  |
| Sample ID          |                                                                       |
| Option             |                                                                       |
| Comment            |                                                                       |
| No. of Scans       | 15                                                                    |
| Resolution         | 4 [cm-1]                                                              |
| Apodization        | Happ-Genzel                                                           |

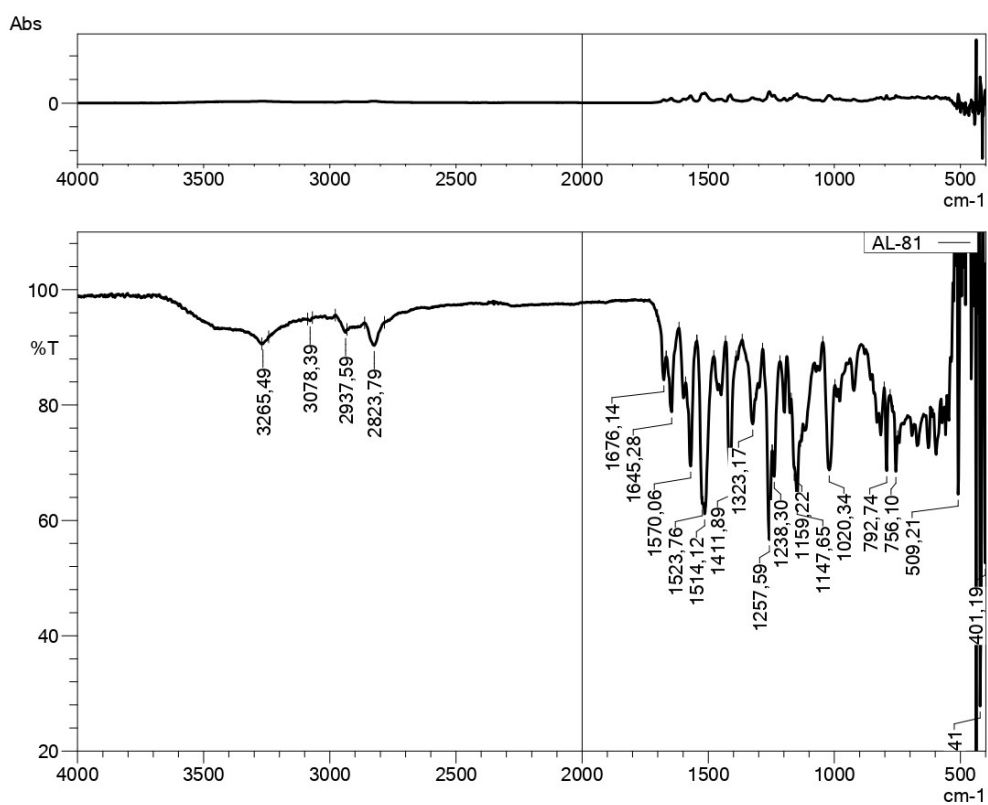

**Figure 36.** FTIR spectra of compound 4h

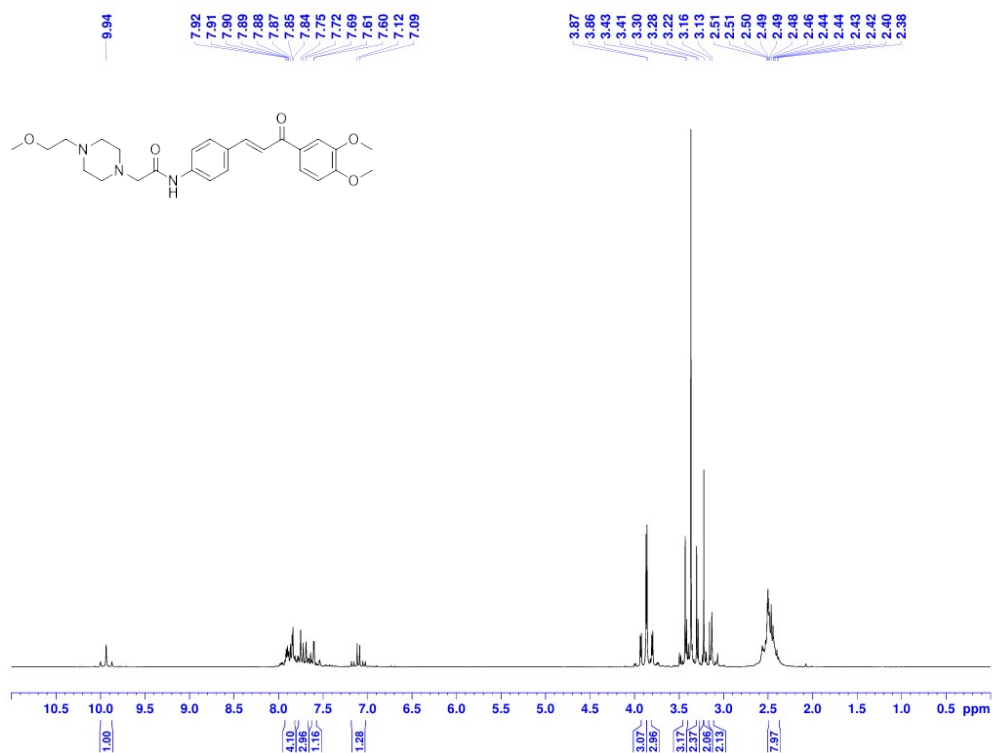

Figure S37. <sup>1</sup>H-NMR spectra of compound 4h

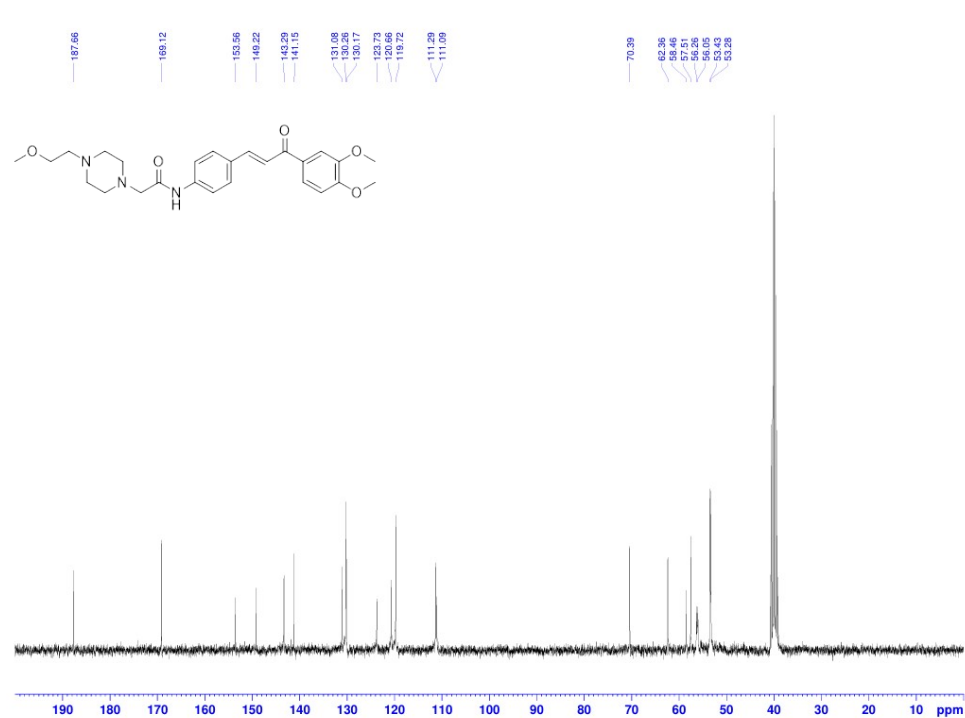

Figure S38. <sup>13</sup>C-NMR spectra of compound 4h

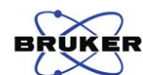

Current Data Parameters  
 NAME AL-8 - Kopya  
 EXPNO 1  
 PROCNO 1  
 F2 - Acquisition Parameters  
 Date 20230331  
 Time 16.25  
 INSTRUM FOURIER300  
 PROBHD 5 mm DUL 13C-1  
 PULPROG zg  
 TD 16384  
 TO SOLVENT DMSO  
 NS 16  
 DS 0  
 SWH 6103.516 Hz  
 FIDRES 0.372529 Hz  
 AQ 1.3421773 sec  
 RG 10.1956  
 DW 81.920 usec  
 DE 6.50 usec  
 TE 355.8 K  
 D1 3.00000000 sec  
 TD0 1  
 ===== CHANNEL f1 =====  
 SFO1 300.1818537 MHz  
 NUC1 1H  
 P1 13.00 usec  
 PLW1 10.00000000 W  
 F2 - Processing parameters  
 SI 65536  
 SF 300.1800000 MHz  
 WDW EM  
 SSB 0  
 LB 0.30 Hz  
 GB 0  
 PC 1.00

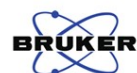

Current Data Parameters  
 NAME AL-8 - Kopya  
 EXPNO 2  
 PROCNO 1  
 F2 - Acquisition Parameters  
 Date 20230331  
 Time 16.27  
 INSTRUM FOURIER300  
 PROBHD 5 mm DUL 13C-1  
 PULPROG zgpg  
 TD 32768  
 TO SOLVENT DMSO  
 NS 2048  
 DS 4  
 SWH 24414.062 Hz  
 FIDRES 0.745058 Hz  
 AQ 0.6710886 sec  
 RG 501.187  
 DW 20.480 usec  
 DE 6.50 usec  
 TE 355.6 K  
 D1 1.00000000 sec  
 D11 0.03000000 sec  
 D31 0.00001500 sec  
 D32 0.89999999 sec  
 D40 0.00083990 sec  
 L4 23  
 L5 26  
 P2 90.00 usec  
 TD0 1  
 ===== CHANNEL f1 =====  
 SFO1 75.4878687 MHz  
 NUC1 13C  
 P1 15.00 usec  
 PLW1 15.00000000 W  
 ===== CHANNEL f2 =====  
 SFO2 300.1812007 MHz  
 NUC2 1H  
 CPDPRG2 waltz16  
 PCPD2 90.00 usec  
 PLW2 10.00000000 W  
 PLW12 0.20863999 W  
 PLW13 0.10495000 W  
 F2 - Processing parameters  
 SI 32768  
 SF 75.4803210 MHz  
 WDW EM  
 SSB 0  
 LB 1.00 Hz  
 GB 0  
 PC 1.40

Data File: C:\LabSolutions\Data\Analiz\Serkan\AL-8\_204.lcd

| Elmt | Val. | Min | Max | Use Adduct |
|------|------|-----|-----|------|------|-----|-----|------|------|-----|-----|------|------|-----|-----|------------|
| H    | 1    | 0   | 33  | O    | 2    | 0   | 5   | Cl   | 1    | 0   | 0   | I    | 3    | 0   | 0   | H          |
| B    | 3    | 0   | 0   | F    | 1    | 0   | 0   | Br   | 1    | 0   | 0   |      |      |     |     |            |
| C    | 4    | 0   | 32  | P    | 3    | 0   | 0   | Ru   | 2    | 0   | 0   |      |      |     |     |            |
| N    | 3    | 0   | 5   | S    | 2    | 0   | 2   | Pd   | 2    | 0   | 0   |      |      |     |     |            |

Error Margin (ppm): 5

DBE Range: 5.0 - 25.0

Electron Ions: odd

HC Ratio: unlimited

Apply N Rule: yes

Use MSn Info: yes

Max Isotopes: 3

Isotope RI (%): 1.00

Isotope Res: 9000

MSn Iso RI (%): 10.00

MSn Logic Mode: AND

Max Results: 50

Event#: 1 MS(E+) Ret. Time : 1.920 Scan# : 289

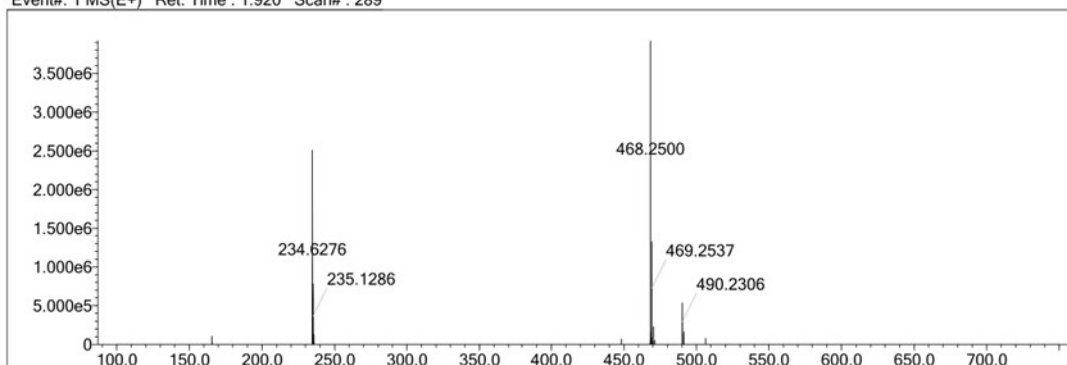

Measured region for 468.2500 m/z

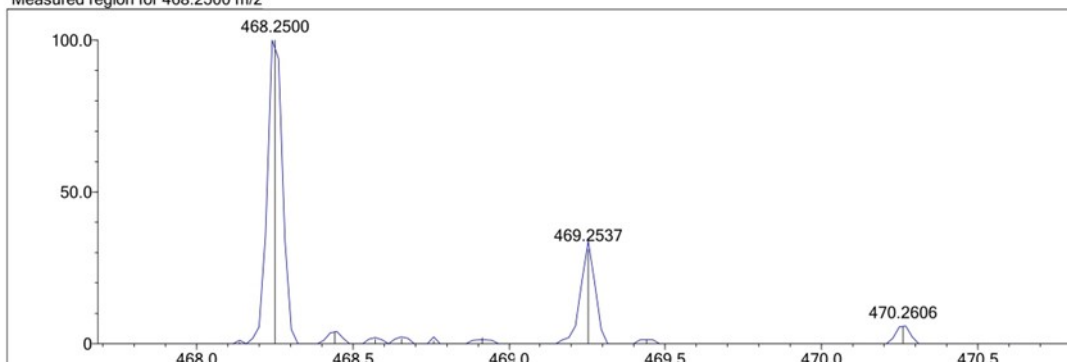C26 H33 N3 O5 [M+H]<sup>+</sup> : Predicted region for 468.2493 m/z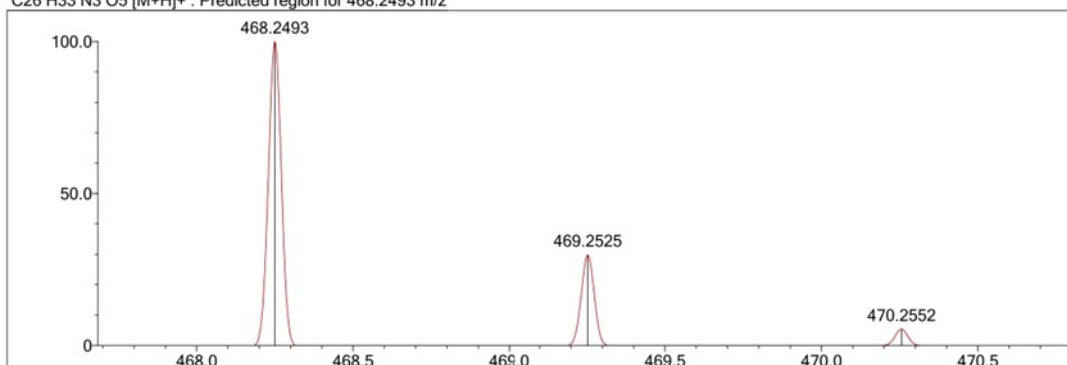

| Rank | Score | Formula (M)   | Ion                | Meas. m/z | Pred. m/z | Df. (mDa) | Df. (ppm) | Iso   | DBE  |
|------|-------|---------------|--------------------|-----------|-----------|-----------|-----------|-------|------|
| 1    | 97.82 | C26 H33 N3 O5 | [M+H] <sup>+</sup> | 468.2500  | 468.2493  | 0.7       | 1.49      | 99.03 | 12.0 |

Figure S39. HRMS spectra of compound **4h**

# ==== Shimadzu LCMSsolution Analysis Report ====

Acquired by : Admin  
 Sample Name : AL-8  
 Sample ID :  
 Vial # : 8  
 Injection Volume : 0.5 uL  
 Data File Name : AL-8\_204.lcd  
 Method File Name : isocratic\_serkan.lcm  
 Batch File Name : batch.lcb  
 Report File Name : DefaultLCMS.lcr  
 Data Acquired : 02.08.2022 18:03:41  
 Data Processed : 04.09.2025 10:44:17

## <Chromatogram>

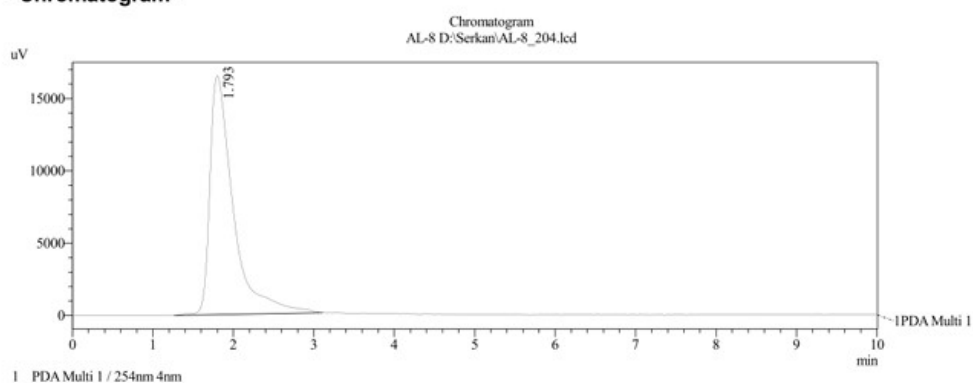

PeakTable

| Peak# | Ret. Time | Area   | Height | Area %  |
|-------|-----------|--------|--------|---------|
| 1     | 1.793     | 334610 | 16510  | 100.000 |
| Total |           | 334610 | 16510  | 100.000 |

**Figure S40.** HPLC chromatogram of compound **4h**

## DOPNALAB

| Item               | Value                                                                 |
|--------------------|-----------------------------------------------------------------------|
| Acquired Date&Time | 17.05.2023 15:42:32                                                   |
| Acquired by        | System Administrator                                                  |
| Filename           | C:\Users\dopnalab\Desktop\MASAÜSTÜ\derya\berkant\AL_serisi\AL-91.ispd |
| Spectrum name      | AL-91                                                                 |
| Sample name        | AL-9                                                                  |
| Sample ID          |                                                                       |
| Option             |                                                                       |
| Comment            |                                                                       |
| No. of Scans       | 15                                                                    |
| Resolution         | 4 [cm-1]                                                              |
| Apodization        | Happ-Genzel                                                           |

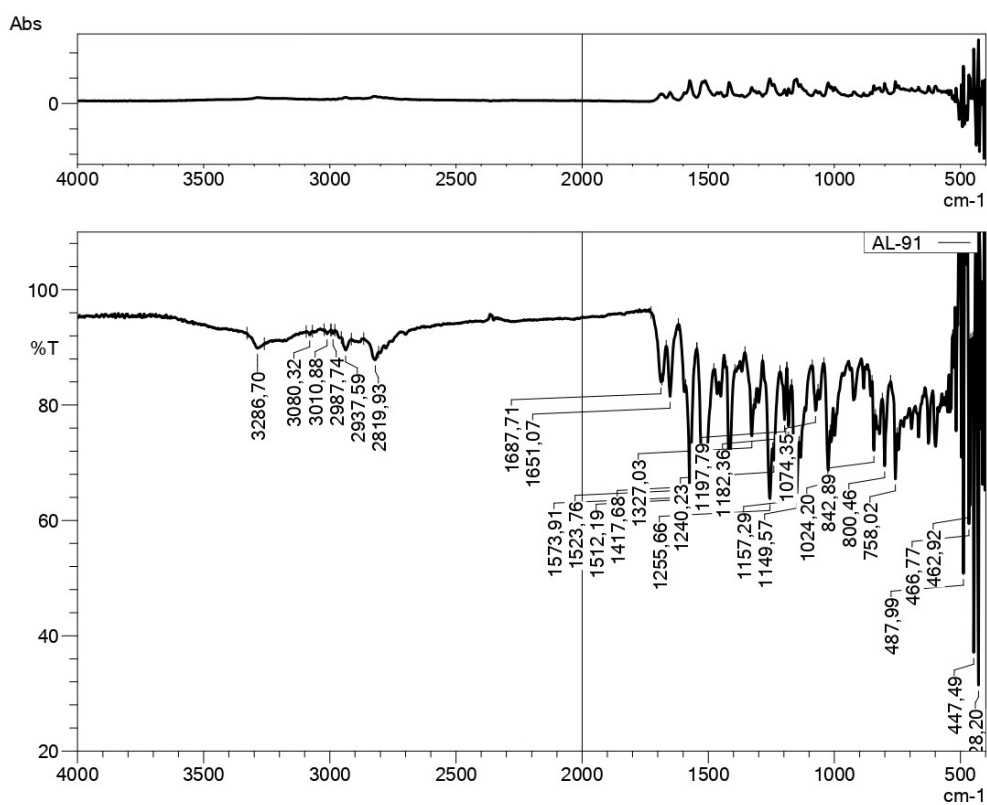

**Figure S41.** FTIR spectra of compound **4i**

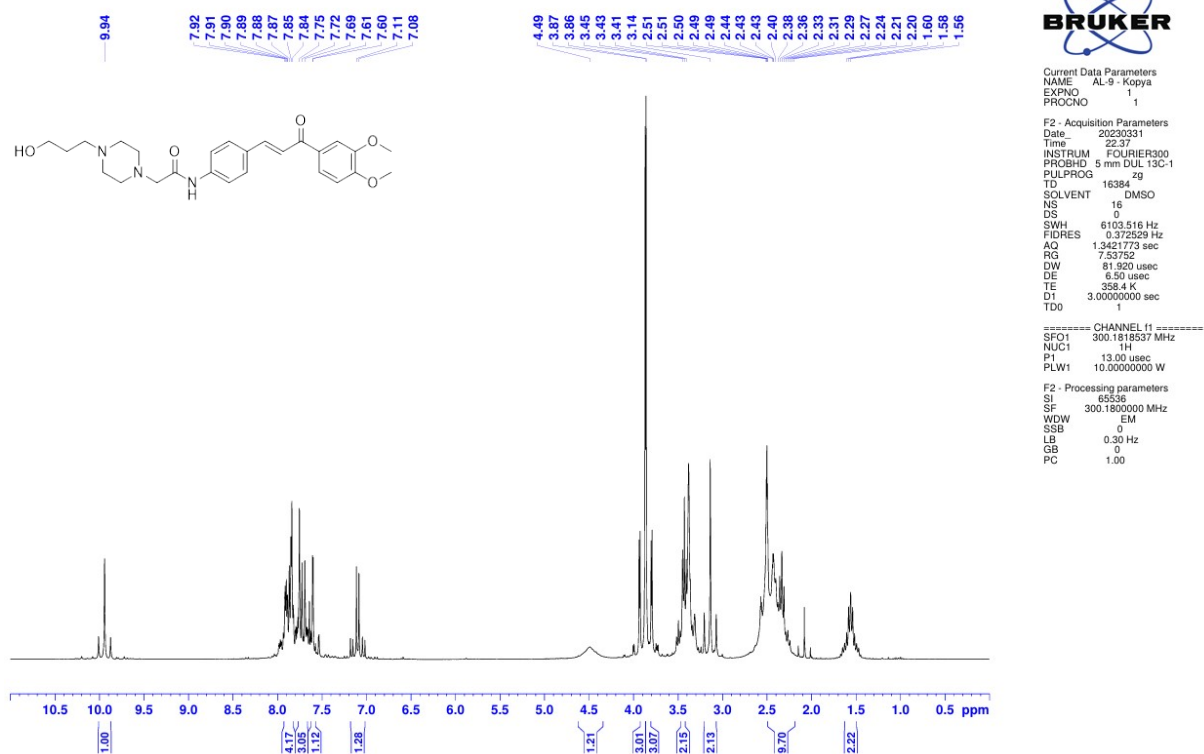

Figure S42. <sup>1</sup>H-NMR spectra of compound 4i

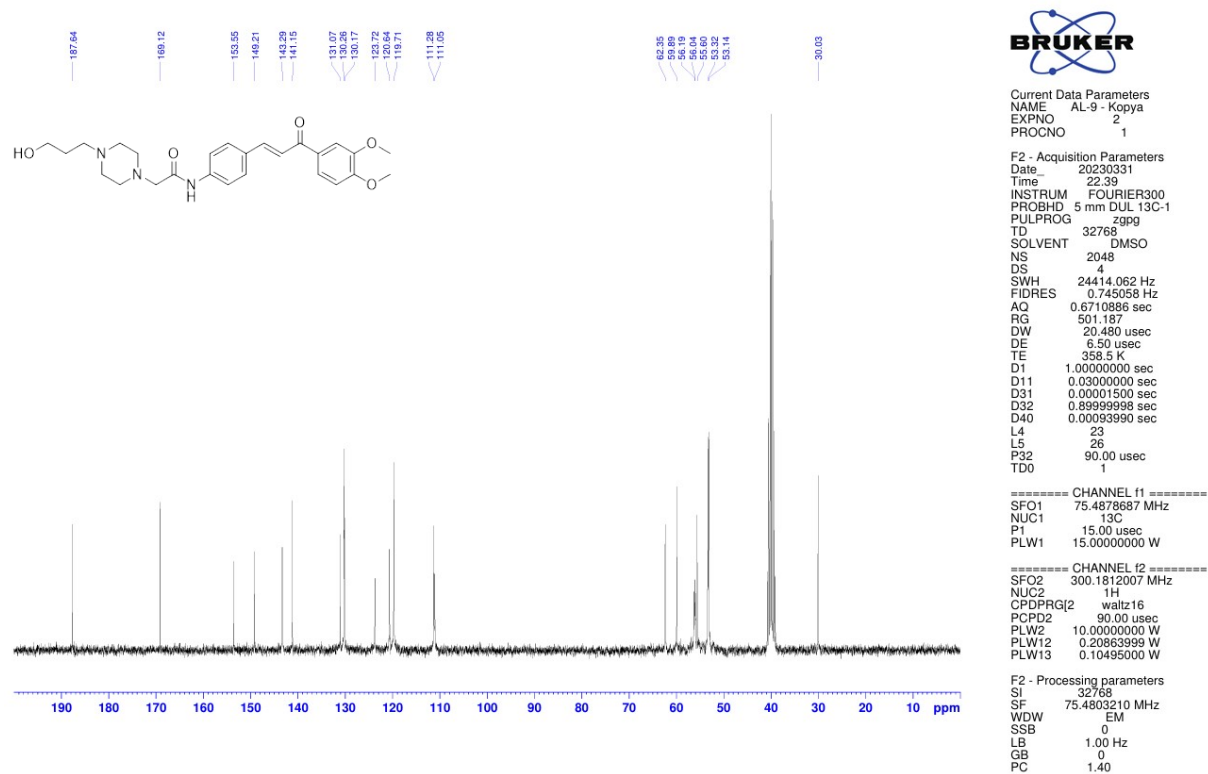

Figure S43. <sup>13</sup>C-NMR spectra of compound 4i

Data File: C:\LabSolutions\Data\Analiz\Serkan\AL-9\_205.lcd

| Elmt | Val. | Min | Max | Use Adduct |
|------|------|-----|-----|------|------|-----|-----|------|------|-----|-----|------|------|-----|-----|------------|
| H    | 1    | 0   | 33  | O    | 2    | 0   | 5   | Cl   | 1    | 0   | 0   | I    | 3    | 0   | 0   | H          |
| B    | 3    | 0   | 0   | F    | 1    | 0   | 0   | Br   | 1    | 0   | 0   |      |      |     |     |            |
| C    | 4    | 0   | 32  | P    | 3    | 0   | 0   | Ru   | 2    | 0   | 0   |      |      |     |     |            |
| N    | 3    | 0   | 5   | S    | 2    | 0   | 2   | Pd   | 2    | 0   | 0   |      |      |     |     |            |

Error Margin (ppm): 5

DBE Range: 5.0 - 25.0

Electron Ions: odd

HC Ratio: unlimited

Apply N Rule: yes

Use MSn Info: yes

Max Isotopes: 3

Isotope RI (%): 1.00

Isotope Res: 9000

MSn Iso RI (%): 10.00

MSn Logic Mode: AND

Max Results: 50

Event#: 1 MS(E+) Ret. Time : 1.813 Scan# : 273

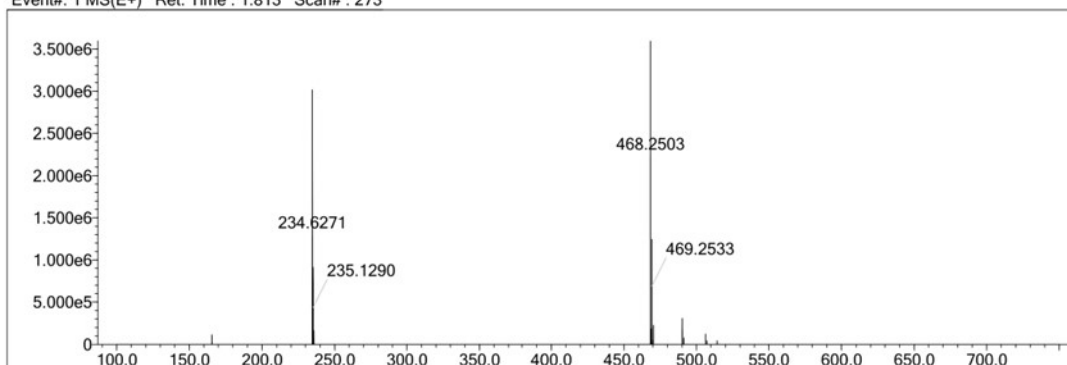

Measured region for 468.2503 m/z

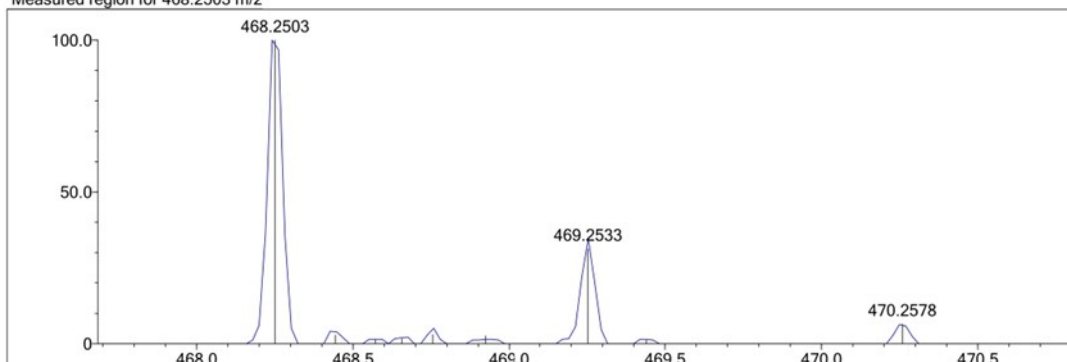C26 H33 N3 O5 [M+H]<sup>+</sup> : Predicted region for 468.2493 m/z

| Rank | Score | Formula (M)   | Ion                | Meas. m/z | Pred. m/z | Df. (mDa) | Df. (ppm) | Iso   | DBE  |
|------|-------|---------------|--------------------|-----------|-----------|-----------|-----------|-------|------|
| 1    | 94.46 | C26 H33 N3 O5 | [M+H] <sup>+</sup> | 468.2503  | 468.2493  | 1.0       | 2.14      | 97.23 | 12.0 |

Figure S44. HRMS spectra of compound **4i**



# ==== Shimadzu LCMSsolution Analysis Report ====

Acquired by : Admin  
 Sample Name : AL-9  
 Sample ID :  
 Vial # : 9  
 Injection Volume : 0.5 uL  
 Data File Name : AL-9\_205.lcd  
 Method File Name : isocratic\_serkan.lcm  
 Batch File Name : batch.lcb  
 Report File Name : DefaultLCMS.lcr  
 Data Acquired : 02.08.2022 18:14:31  
 Data Processed : 04.09.2025 10:45:40

## <Chromatogram>

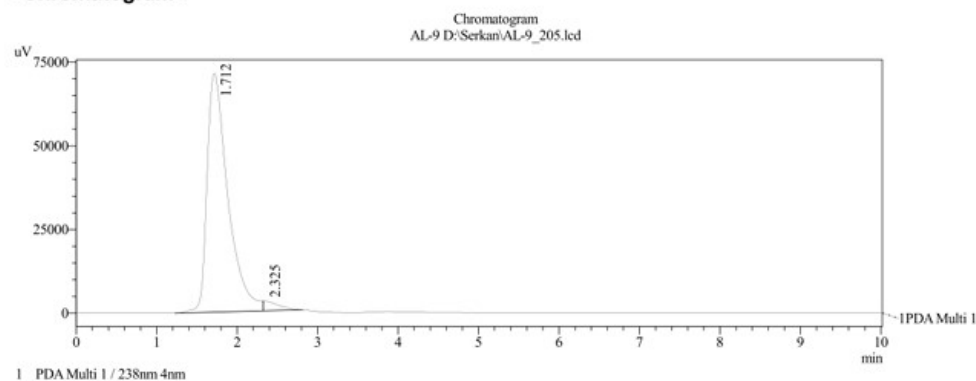

PeakTable

| Peak# | Ret. Time | Area    | Height | Area %  |
|-------|-----------|---------|--------|---------|
| 1     | 1.712     | 1285440 | 71375  | 97.133  |
| 2     | 2.325     | 37937   | 2954   | 2.867   |
| Total |           | 1323377 | 74329  | 100.000 |

**Figure S45.** HPLC chromatogram of compound **4i**

# DOPNALAB

| Item               | Value                                                                  |
|--------------------|------------------------------------------------------------------------|
| Acquired Date&Time | 17.05.2023 15:46:43                                                    |
| Acquired by        | System Administrator                                                   |
| Filename           | C:\Users\dopnalab\Desktop\MASAÜSTÜ\derya\berkant\AL_serisi\AL-101.ispd |
| Spectrum name      | AL-101                                                                 |
| Sample name        | AL-10                                                                  |
| Sample ID          |                                                                        |
| Option             |                                                                        |
| Comment            |                                                                        |
| No. of Scans       | 15                                                                     |
| Resolution         | 4 [cm-1]                                                               |
| Apodization        | Happ-Genzel                                                            |

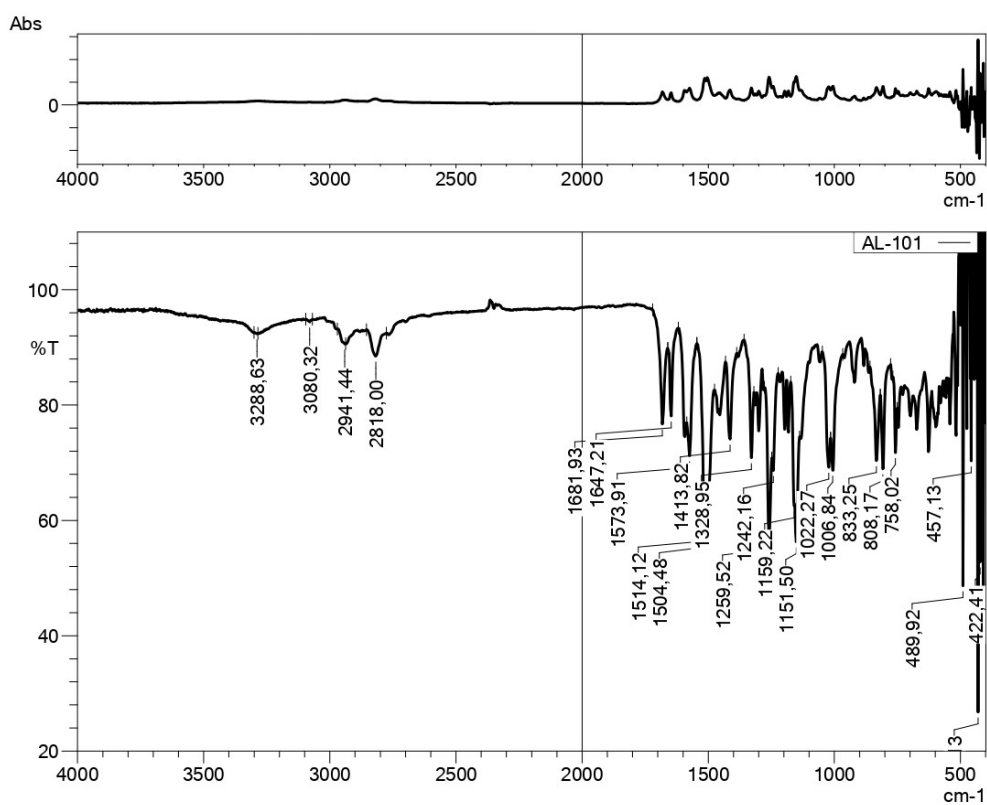

**Figure S46.** FTIR spectra of compound **4j**

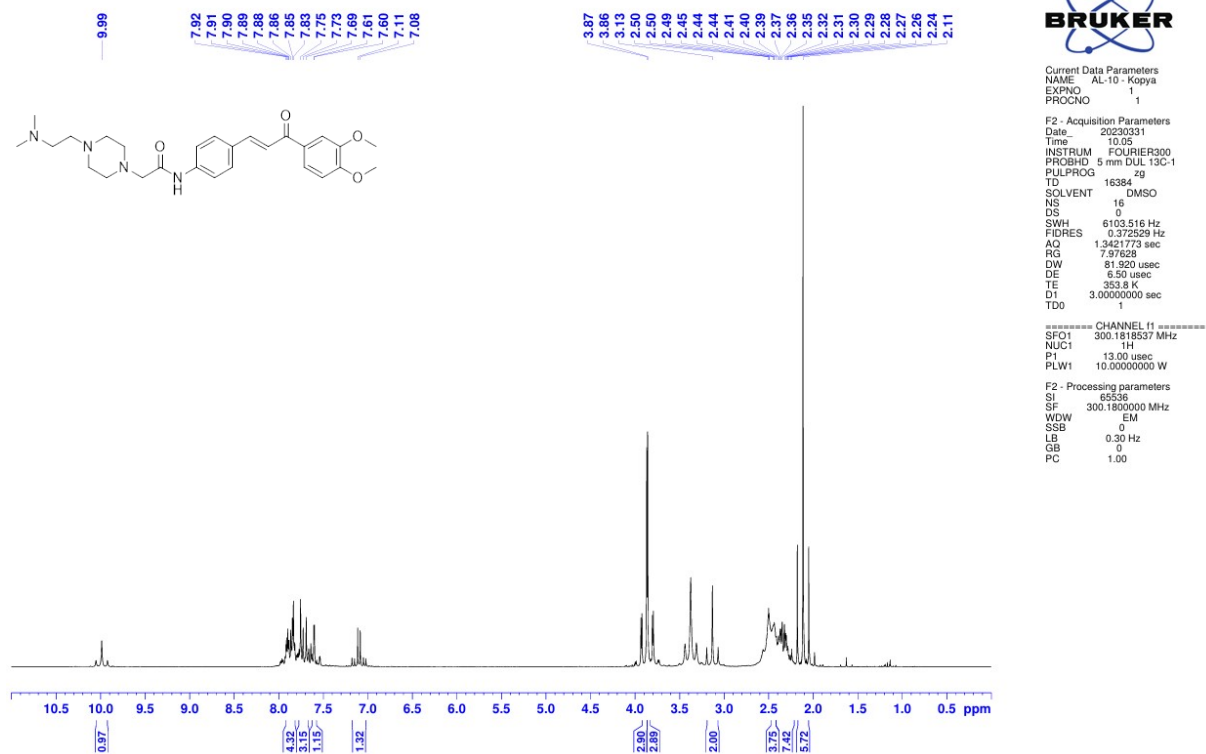

Figure S47. <sup>1</sup>H-NMR spectra of compound 4j

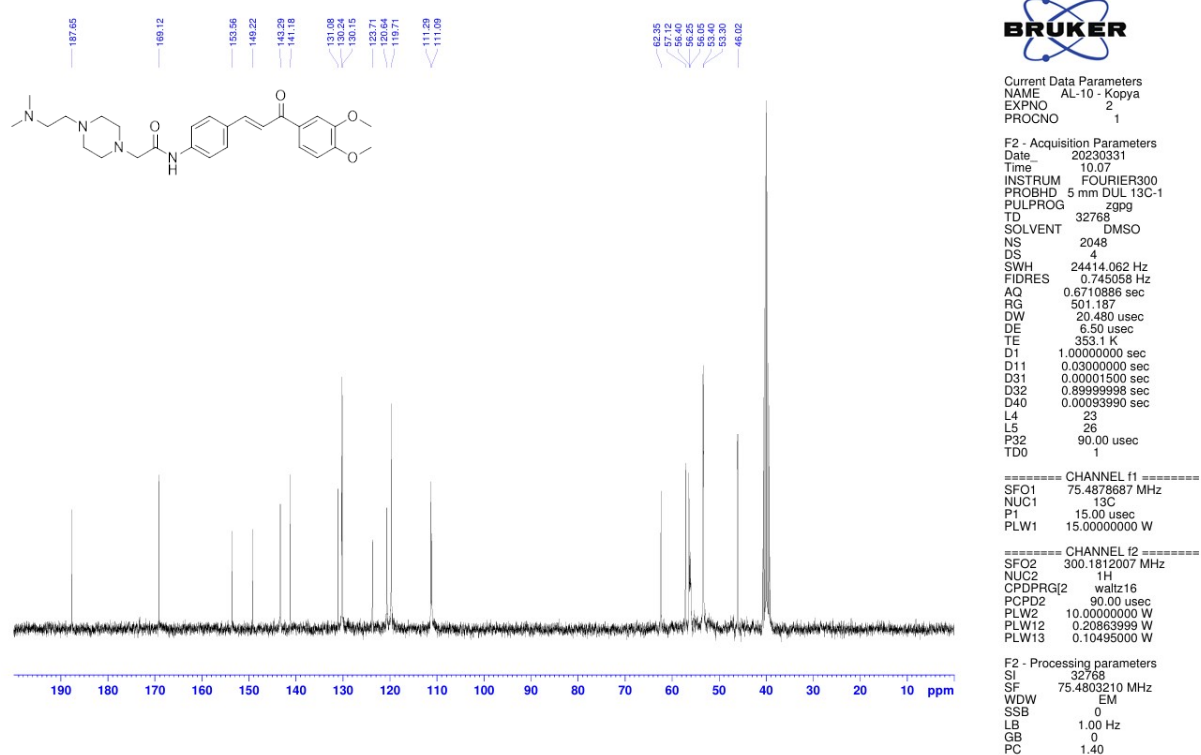

Figure S48. <sup>13</sup>C-NMR spectra of compound 4j

Data File: C:\LabSolutions\Data\Analiz\Serkan\AL-10\_206.lcd

| Elmt | Val. | Min | Max | Use Adduct |
|------|------|-----|-----|------|------|-----|-----|------|------|-----|-----|------|------|-----|-----|------------|
| H    | 1    | 0   | 36  | O    | 2    | 0   | 5   | Cl   | 1    | 0   | 0   | I    | 3    | 0   | 0   | H          |
| B    | 3    | 0   | 0   | F    | 1    | 0   | 0   | Br   | 1    | 0   | 0   |      |      |     |     |            |
| C    | 4    | 0   | 32  | P    | 3    | 0   | 0   | Ru   | 2    | 0   | 0   |      |      |     |     |            |
| N    | 3    | 0   | 5   | S    | 2    | 0   | 2   | Pd   | 2    | 0   | 0   |      |      |     |     |            |

Error Margin (ppm): 5

DBE Range: 5.0 - 25.0

Electron Ions: odd

HC Ratio: unlimited

Apply N Rule: yes

Use MSn Info: yes

Max Isotopes: 3

Isotope RI (%): 1.00

Isotope Res: 9000

MSn Iso RI (%): 10.00

MSn Logic Mode: AND

Max Results: 50

Event#: 1 MS(E+) Ret. Time : 1.720 Scan#: 259

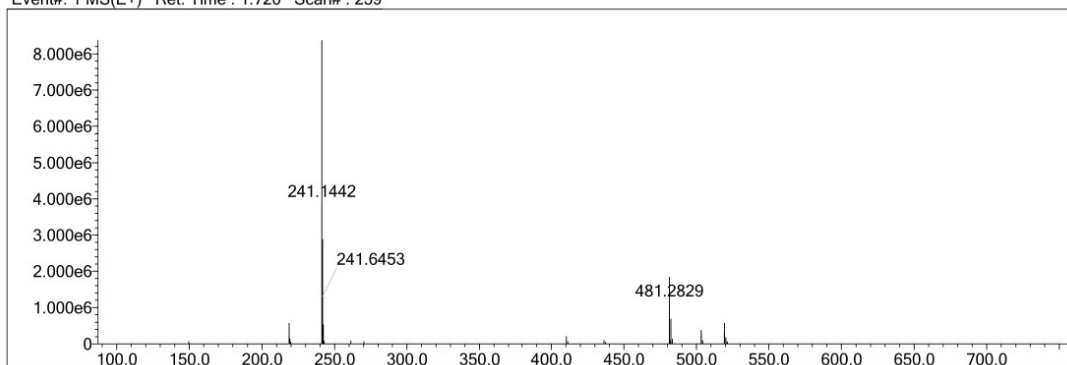

Measured region for 241.1442 m/z

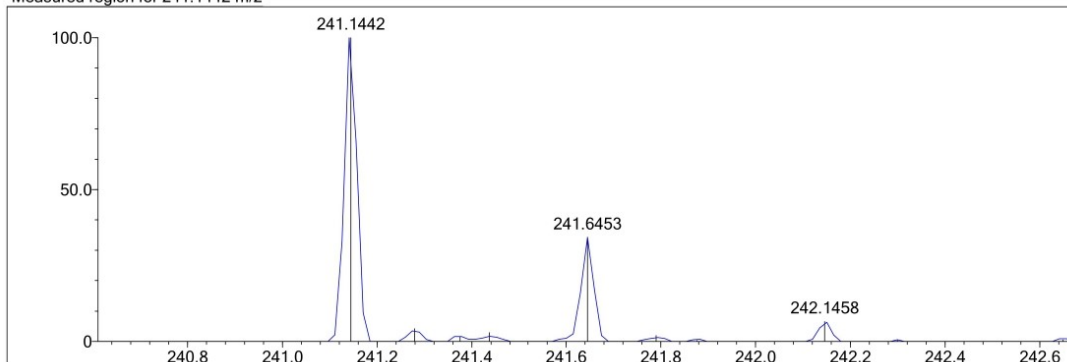C27 H36 N4 O4 [M+2H]<sup>2+</sup> : Predicted region for 241.1441 m/z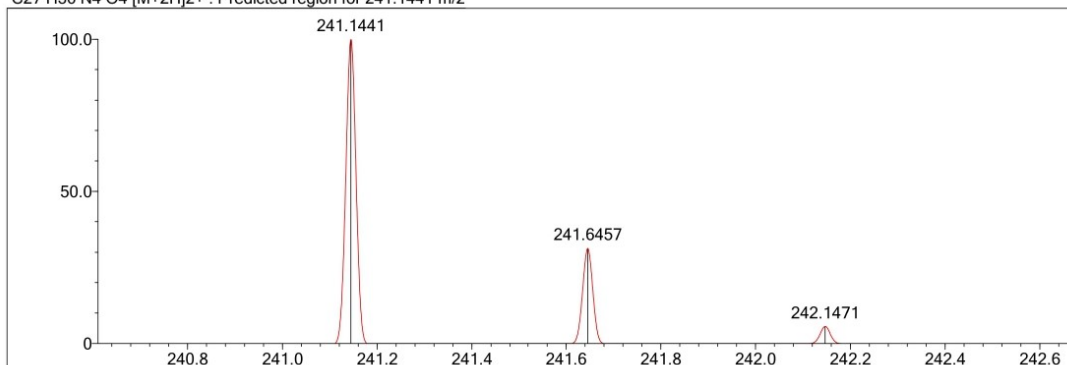

| Rank | Score | Formula (M)   | Ion                  | Meas. m/z | Pred. m/z | Df. (mDa) | Df. (ppm) | Iso   | DBE  |
|------|-------|---------------|----------------------|-----------|-----------|-----------|-----------|-------|------|
| 1    | 80.57 | C27 H36 N4 O4 | [M+2H] <sup>2+</sup> | 241.1442  | 241.1441  | 0.1       | 0.41      | 80.57 | 12.0 |

Figure S49. HRMS spectra of compound 4j

# ==== Shimadzu LCMSsolution Analysis Report ====

Acquired by : Admin  
 Sample Name : AL-10  
 Sample ID :  
 Vail # : 10  
 Injection Volume : 1 uL  
 Data File Name : AL-10\_206.lcd  
 Method File Name : isocratic\_serkan-15DK.lcm  
 Batch File Name : 1.lcb  
 Report File Name : DefaultLCMS.lcr  
 Data Acquired : 02.08.2022 18:25:18  
 Data Processed : 09.09.2025 10:09:17

## <Chromatogram>

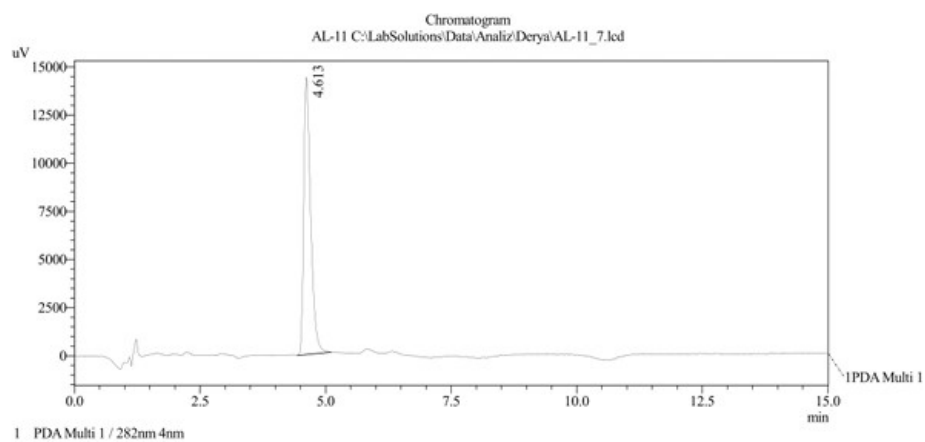

PDA Ch1 282nm 4nm

| Peak# | Ret. Time | Area   | Height | Area %  |
|-------|-----------|--------|--------|---------|
| 1     | 4.613     | 138184 | 14404  | 100.000 |
| Total |           | 138184 | 14404  | 100.000 |

PeakTable

**Figure S50.** HPLC chromatogram of compound **4j**

# DOPNALAB

| Item               | Value                                                                |
|--------------------|----------------------------------------------------------------------|
| Acquired Date&Time | 17.05.2023 15:50:52                                                  |
| Acquired by        | System Administrator                                                 |
| Filename           | C:\Users\dopnalab\Desktop\MASAÜSTÜ\derya\berkant\AL seri\AL-111.ispd |
| Spectrum name      | AL-111                                                               |
| Sample name        | AL-11                                                                |
| Sample ID          |                                                                      |
| Option             |                                                                      |
| Comment            |                                                                      |
| No. of Scans       | 15                                                                   |
| Resolution         | 4 [cm-1]                                                             |
| Apodization        | Happ-Genzel                                                          |

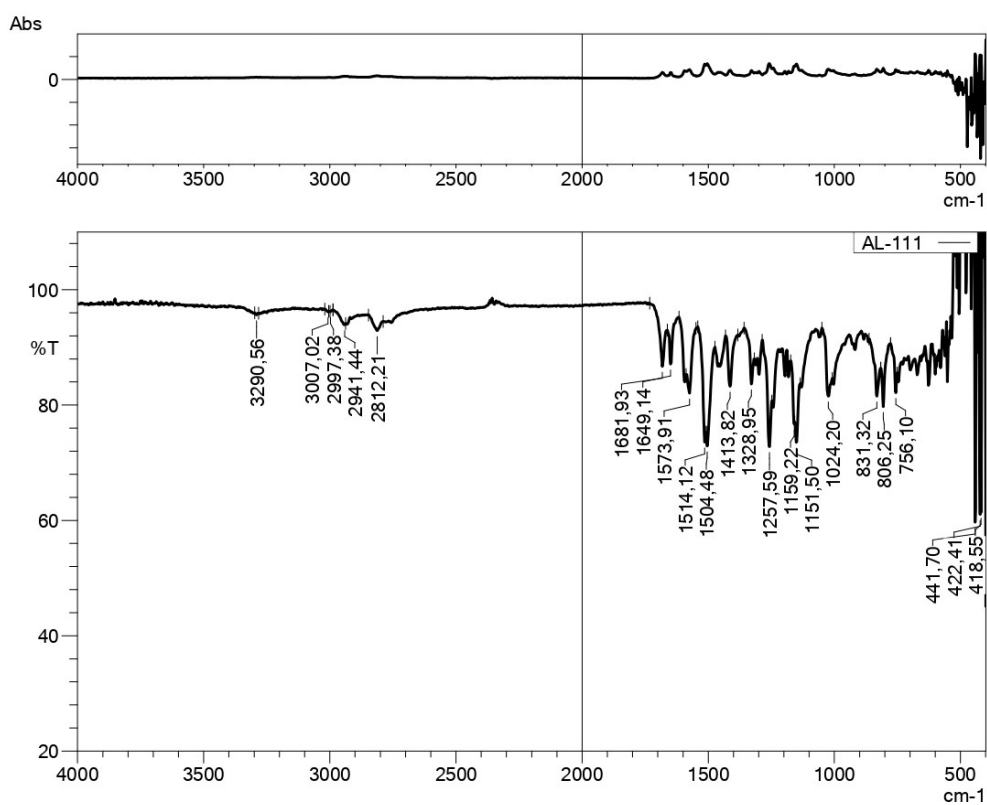

**Figure S51.** FTIR spectra of compound **4k**

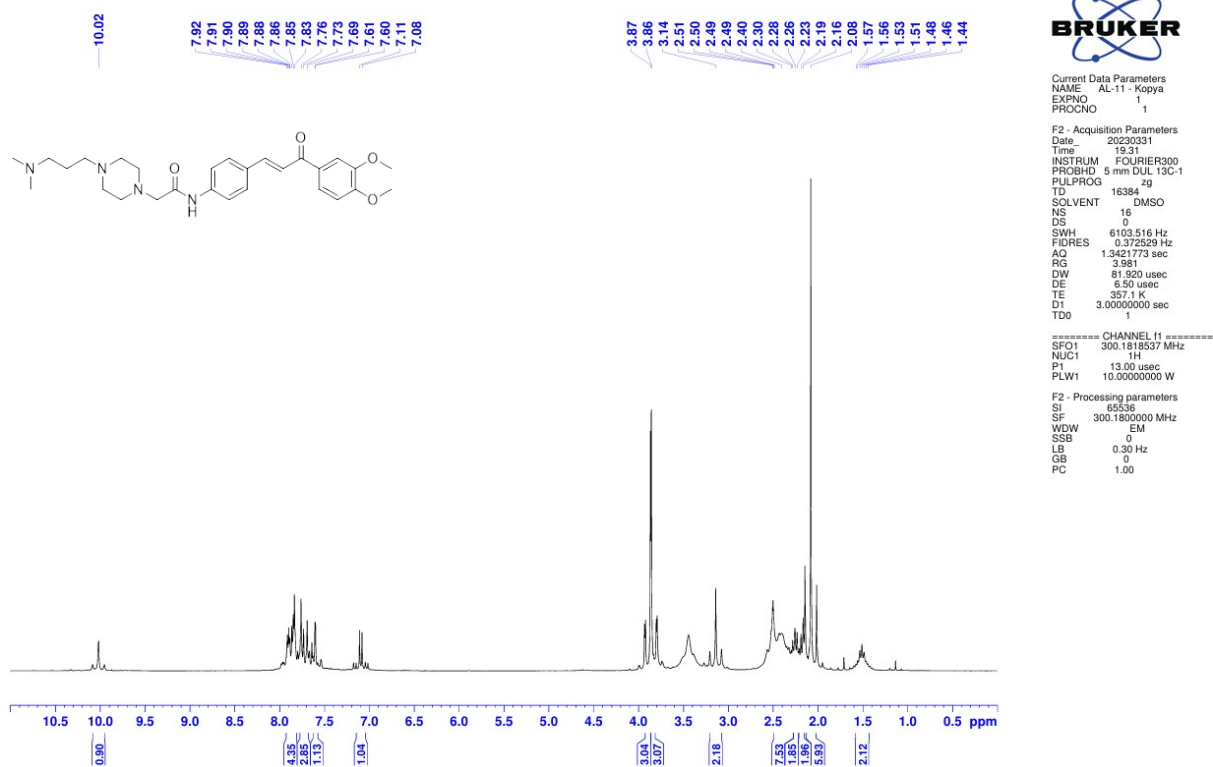

Figure S52. <sup>1</sup>H-NMR spectra of compound 4k

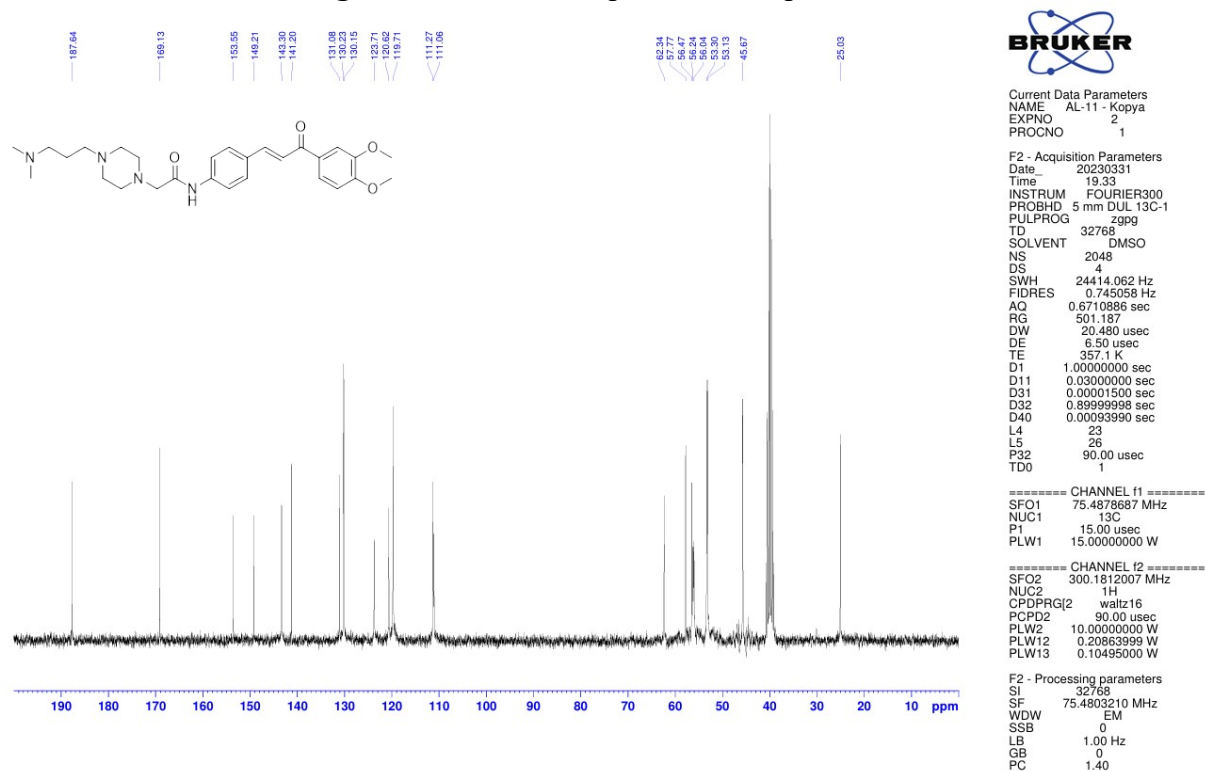

Figure S53. <sup>13</sup>C-NMR spectra of compound 4k

Data File: C:\LabSolutions\Data\Analiz\Serkan\AL-11\_207.lcd

| Elmt | Val. | Min | Max | Use Adduct |
|------|------|-----|-----|------|------|-----|-----|------|------|-----|-----|------|------|-----|-----|------------|
| H    | 1    | 0   | 38  | O    | 2    | 0   | 5   | Cl   | 1    | 0   | 0   | I    | 3    | 0   | 0   | H          |
| B    | 3    | 0   | 0   | F    | 1    | 0   | 0   | Br   | 1    | 0   | 0   |      |      |     |     |            |
| C    | 4    | 0   | 32  | P    | 3    | 0   | 0   | Ru   | 2    | 0   | 0   |      |      |     |     |            |
| N    | 3    | 0   | 5   | S    | 2    | 0   | 2   | Pd   | 2    | 0   | 0   |      |      |     |     |            |

Error Margin (ppm): 5

DBE Range: 5.0 - 25.0

Electron Ions: odd

HC Ratio: unlimited

Apply N Rule: yes

Use MSn Info: yes

Max Isotopes: 3

Isotope RI (%): 1.00

Isotope Res: 9000

MSn Iso RI (%): 10.00

MSn Logic Mode: AND

Max Results: 50

Event#: 1 MS(E+) Ret. Time : 1.827 Scan# : 275

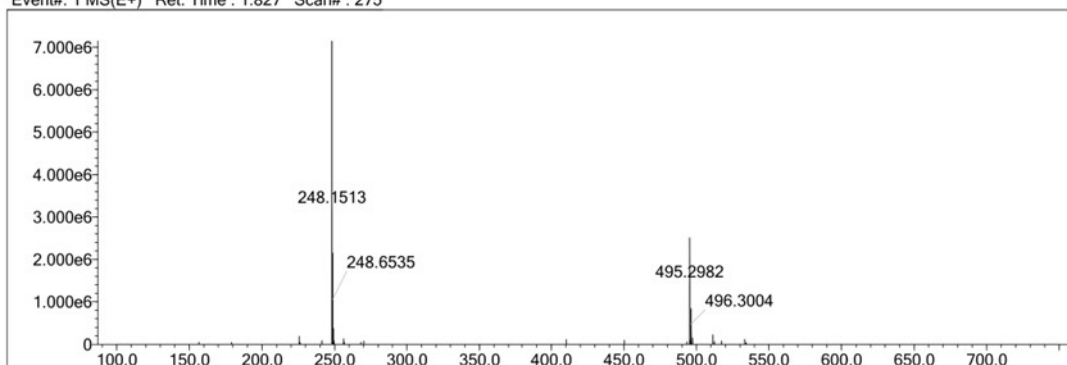

Measured region for 248.1513 m/z

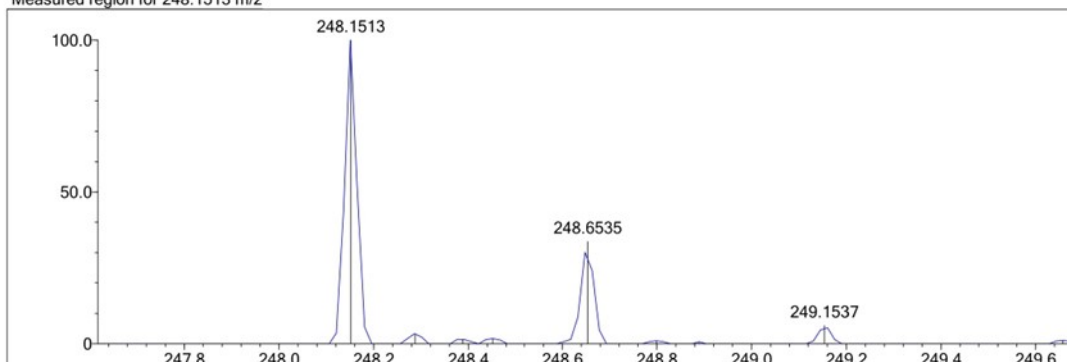

C28 H38 N4 O4 [M+2H]2+ : Predicted region for 248.1519 m/z

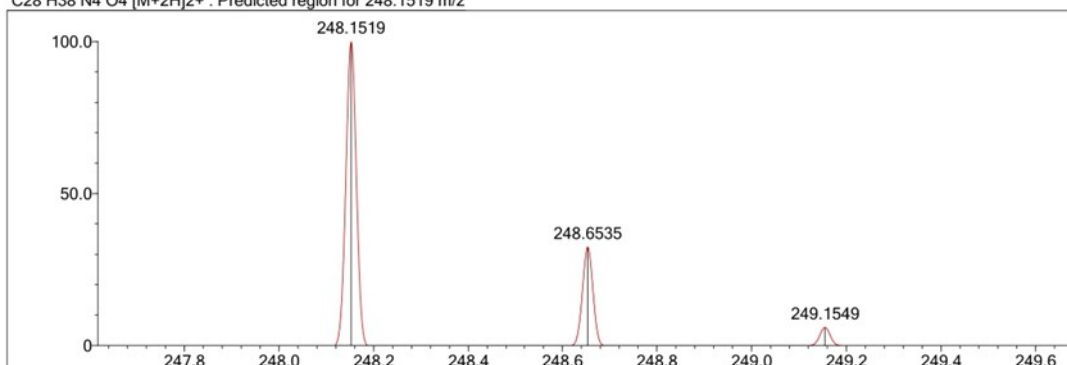

| Rank | Score | Formula (M)   | Ion      | Meas. m/z | Pred. m/z | Df. (mDa) | Df. (ppm) | Iso   | DBE  |
|------|-------|---------------|----------|-----------|-----------|-----------|-----------|-------|------|
| 1    | 77.68 | C28 H38 N4 O4 | [M+2H]2+ | 248.1513  | 248.1519  | -0.6      | -2.42     | 80.54 | 12.0 |

Figure S54. HRMS spectra of compound **4k**



# ==== Shimadzu LCMSsolution Analysis Report =====

Acquired by : Admin  
 Sample Name : AL-11  
 Sample ID :  
 Vial # : 4  
 Injection Volume : 1 uL  
 Data File Name : AL-11\_7.lcd  
 Method File Name : isocratic\_serkan-15DK.lcm  
 Batch File Name : 1.lcb  
 Report File Name : DefaultLCMS.lcr  
 Data Acquired : 02.08.2022 18:36:08  
 Data Processed : 08.09.2025 10:00:48

## <Chromatogram>

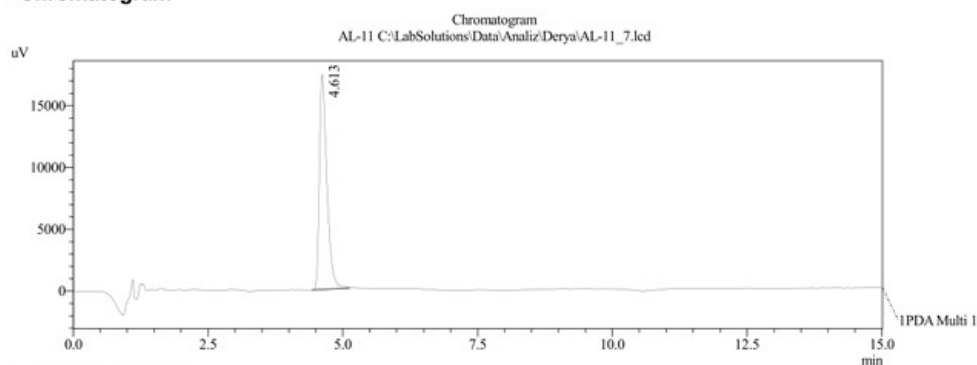

PeakTable

| Peak# | Ret. Time | Area   | Height | Area %  |
|-------|-----------|--------|--------|---------|
| 1     | 4.613     | 167372 | 17415  | 100.000 |
| Total |           | 167372 | 17415  | 100.000 |

**Figure S55.** HPLC chromatogram of compound **4k**

## DOPNALAB

| Item               | Value                                                                |
|--------------------|----------------------------------------------------------------------|
| Acquired Date&Time | 17.05.2023 15:56:06                                                  |
| Acquired by        | System Administrator                                                 |
| Filename           | C:\Users\dopnalab\Desktop\MASAÜSTÜ\derya\berkant\AL seri\AL-121.ispd |
| Spectrum name      | AL-121                                                               |
| Sample name        | AL-12                                                                |
| Sample ID          |                                                                      |
| Option             |                                                                      |
| Comment            |                                                                      |
| No. of Scans       | 15                                                                   |
| Resolution         | 4 [cm-1]                                                             |
| Apodization        | Happ-Genzel                                                          |

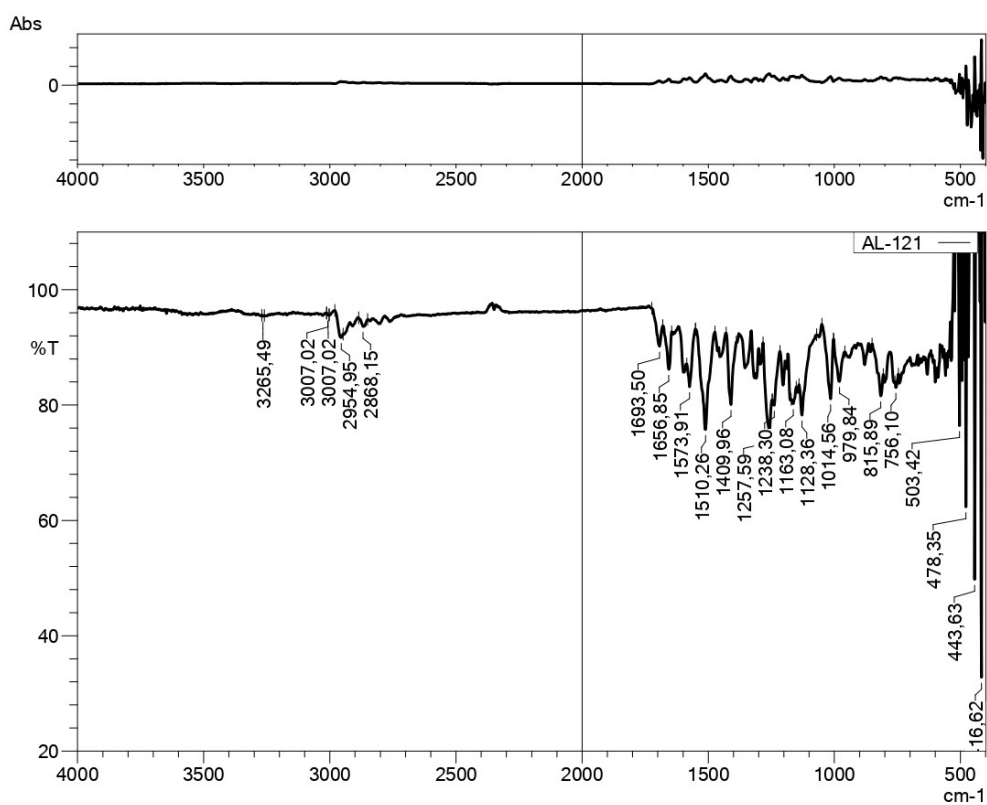

**Figure S56.** FTIR spectra of compound 41

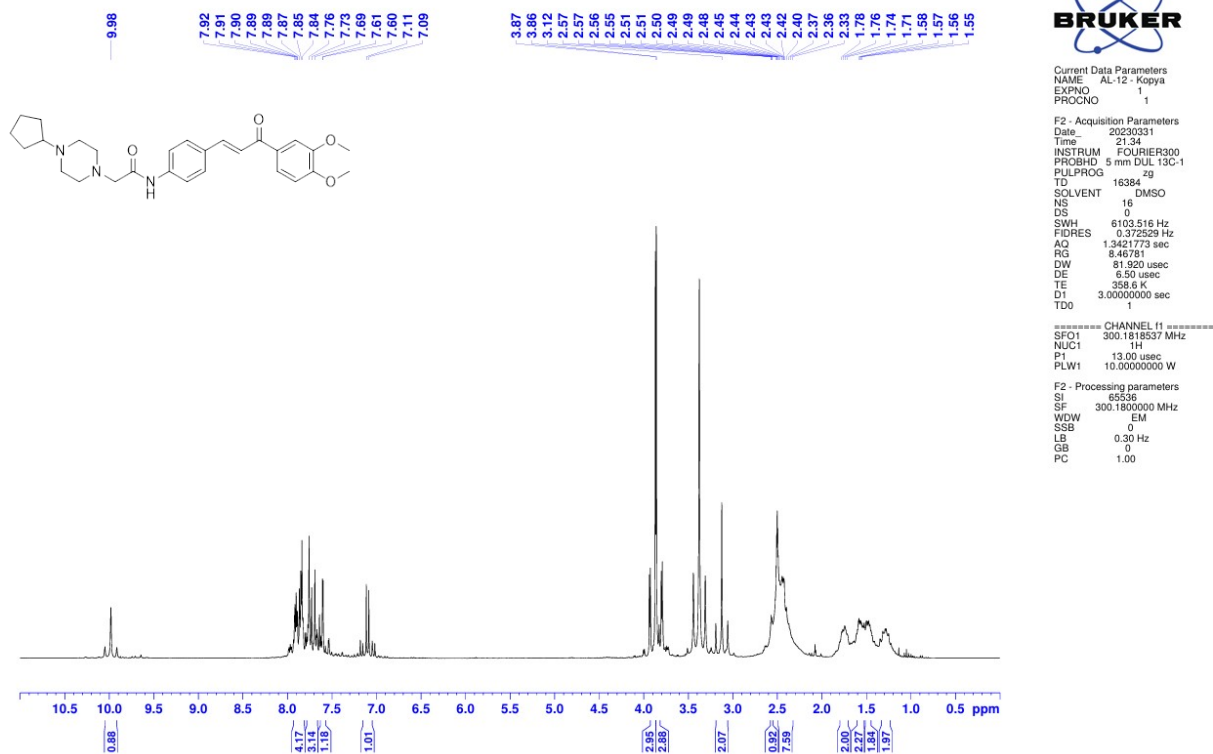

Figure S57. <sup>1</sup>H-NMR spectra of compound 4I

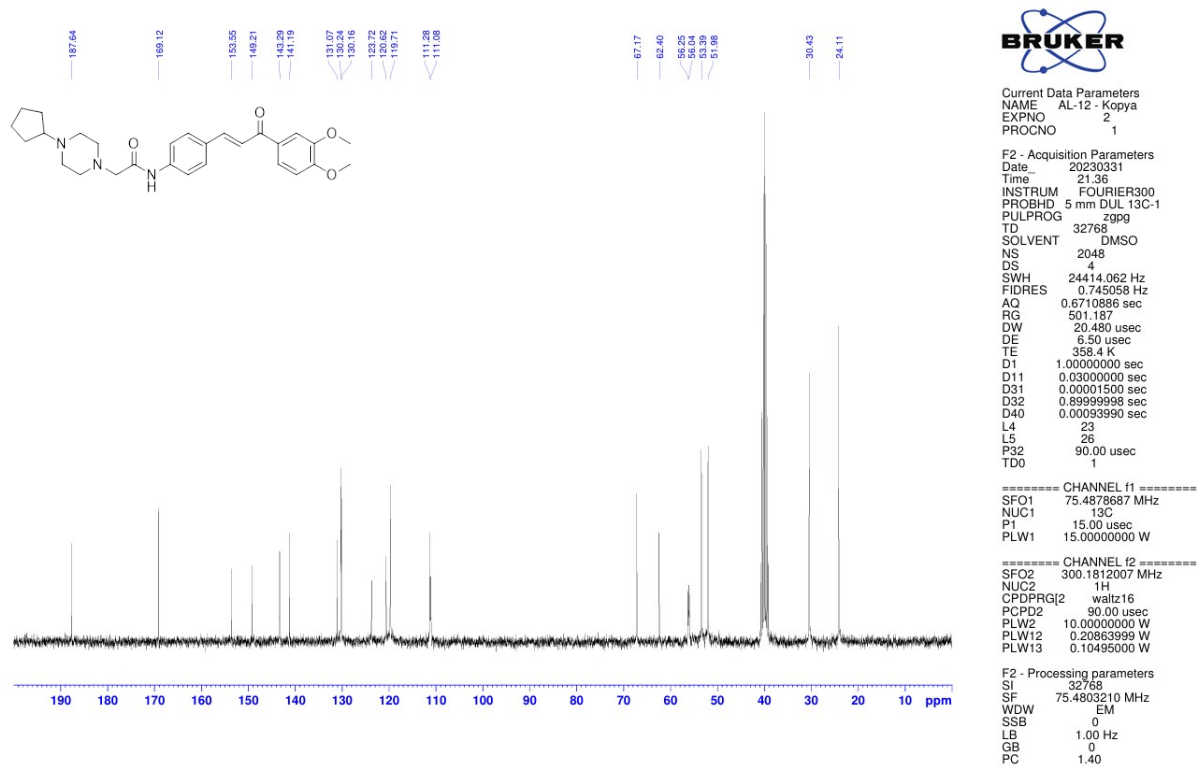

Figure S58. <sup>13</sup>C-NMR spectra of compound 4I

Data File: C:\LabSolutions\Data\Analiz\Serkan\AL-12\_208.lcd

| Elmt | Val. | Min | Max | Use Adduct |
|------|------|-----|-----|------|------|-----|-----|------|------|-----|-----|------|------|-----|-----|------------|
| H    | 1    | 0   | 38  | O    | 2    | 0   | 5   | Cl   | 1    | 0   | 0   | I    | 3    | 0   | 0   | H          |
| B    | 3    | 0   | 0   | F    | 1    | 0   | 0   | Br   | 1    | 0   | 0   |      |      |     |     |            |
| C    | 4    | 0   | 32  | P    | 3    | 0   | 0   | Ru   | 2    | 0   | 0   |      |      |     |     |            |
| N    | 3    | 0   | 5   | S    | 2    | 0   | 2   | Pd   | 2    | 0   | 0   |      |      |     |     |            |

Error Margin (ppm): 5

DBE Range: 5.0 - 25.0

Electron Ions: odd

HC Ratio: unlimited

Apply N Rule: yes

Use MSn Info: yes

Max Isotopes: 3

Isotope RI (%): 1.00

Isotope Res: 9000

MSn Iso RI (%): 10.00

MSn Logic Mode: AND

Max Results: 50

Event#: 1 MS(E+) Ret. Time : 2.253 Scan# : 339

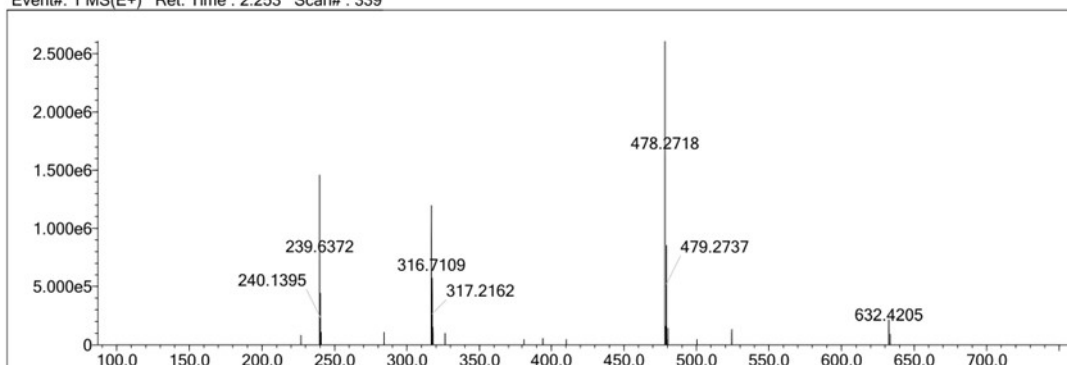

Measured region for 478.2718 m/z

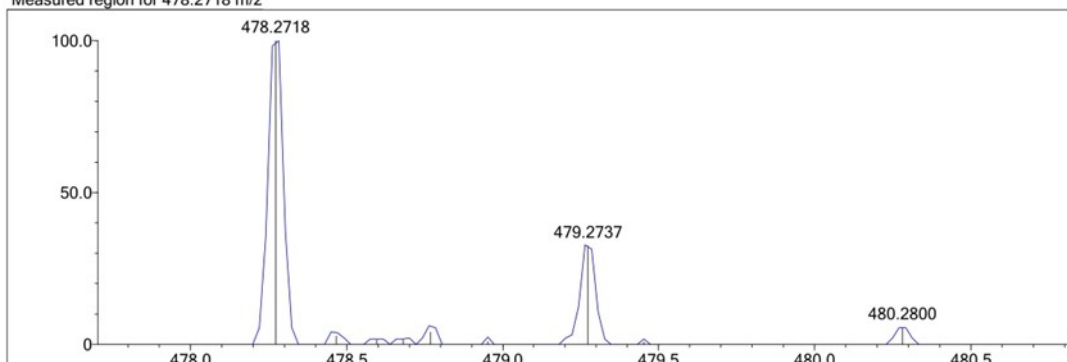C28 H35 N3 O4 [M+H]<sup>+</sup> : Predicted region for 478.2700 m/z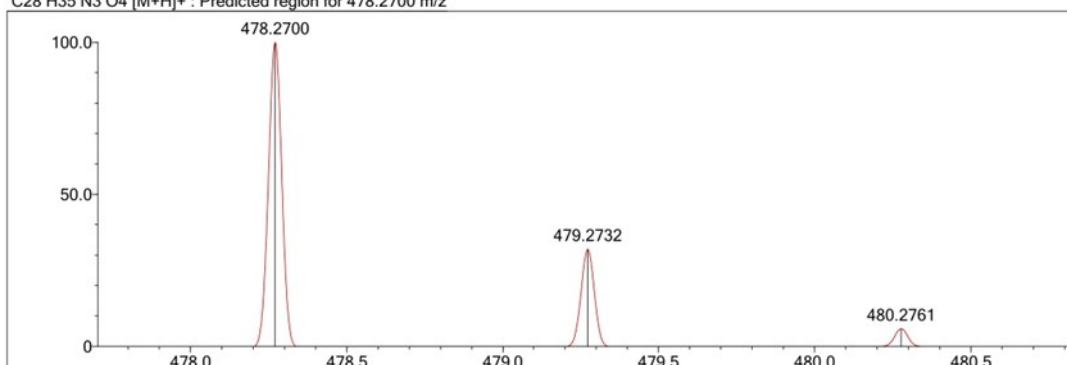

| Rank | Score | Formula (M)   | Ion                | Meas. m/z | Pred. m/z | Df. (mDa) | Df. (ppm) | Iso    | DBE  |
|------|-------|---------------|--------------------|-----------|-----------|-----------|-----------|--------|------|
| 1    | 93.10 | C28 H35 N3 O4 | [M+H] <sup>+</sup> | 478.2718  | 478.2700  | 1.8       | 3.76      | 100.00 | 13.0 |

Figure S59. HRMS spectra of compound 4l

==== Shimadzu LCMSsolution Analysis Report ====

Acquired by : Admin  
Sample Name : AL-12  
Sample ID :  
Vial # : 12  
Injection Volume : 0.5 uL  
Data File Name : AL-12\_208.lcd  
Method File Name : isocratic\_serkan.lcm  
Batch File Name : batch.lcb  
Report File Name : DefaultLCMS.lcr  
Data Acquired : 02.08.2022 18:46:56  
Data Processed : 02.08.2022 18:56:59

<Chromatogram>

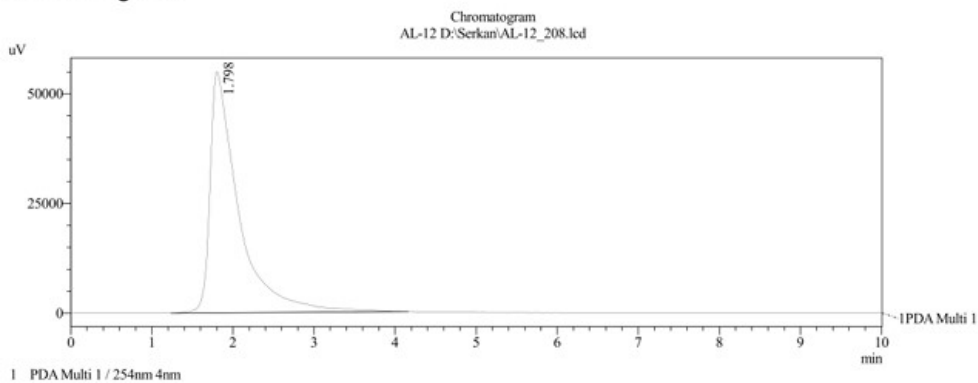

PeakTable

| Peak# | Ret. Time | Area    | Height | Area %  |
|-------|-----------|---------|--------|---------|
| 1     | 1.798     | 1355435 | 55035  | 100.000 |
| Total |           | 1355435 | 55035  | 100.000 |

Figure S60. HPLC chromatogram of compound 4l

## DOPNALAB

| Item               | Value                                                                  |
|--------------------|------------------------------------------------------------------------|
| Acquired Date&Time | 17.05.2023 16:01:29                                                    |
| Acquired by        | System Administrator                                                   |
| Filename           | C:\Users\dopnalab\Desktop\MASAÜSTÜ\derya\berkant\AL serisi\AL-131.ispd |
| Spectrum name      | AL-131                                                                 |
| Sample name        | AL-13                                                                  |
| Sample ID          |                                                                        |
| Option             |                                                                        |
| Comment            |                                                                        |
| No. of Scans       | 15                                                                     |
| Resolution         | 4 [cm-1]                                                               |
| Apodization        | Happ-Genzel                                                            |

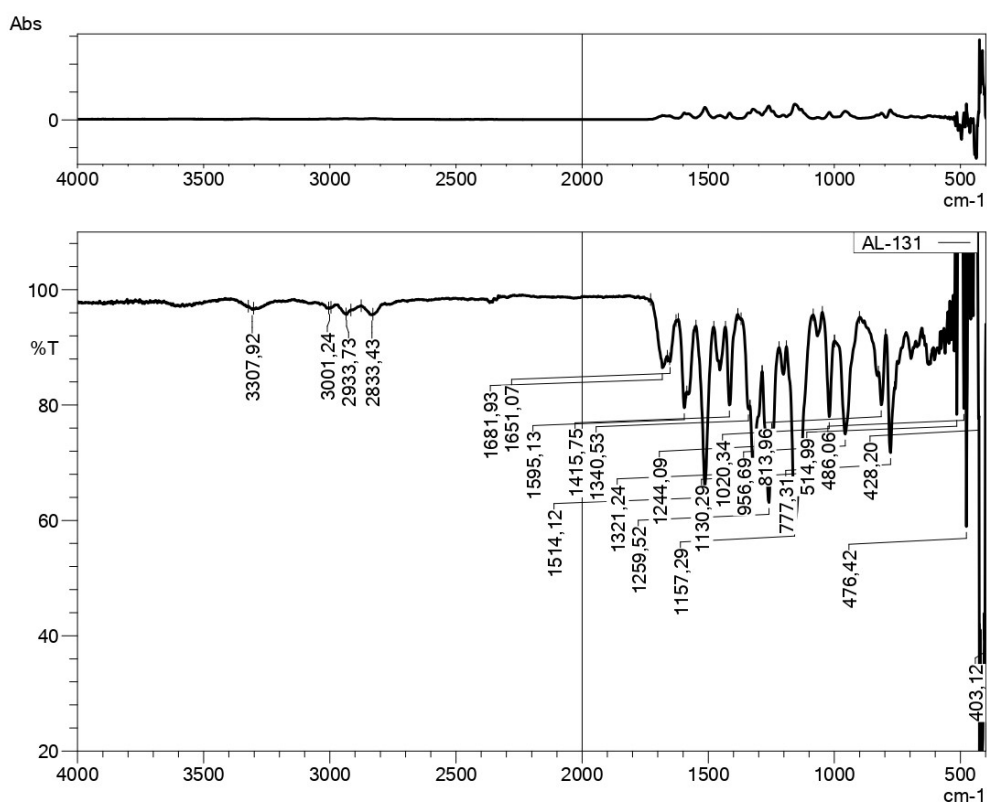

**Figure S61.** FTIR spectra of compound **4m**

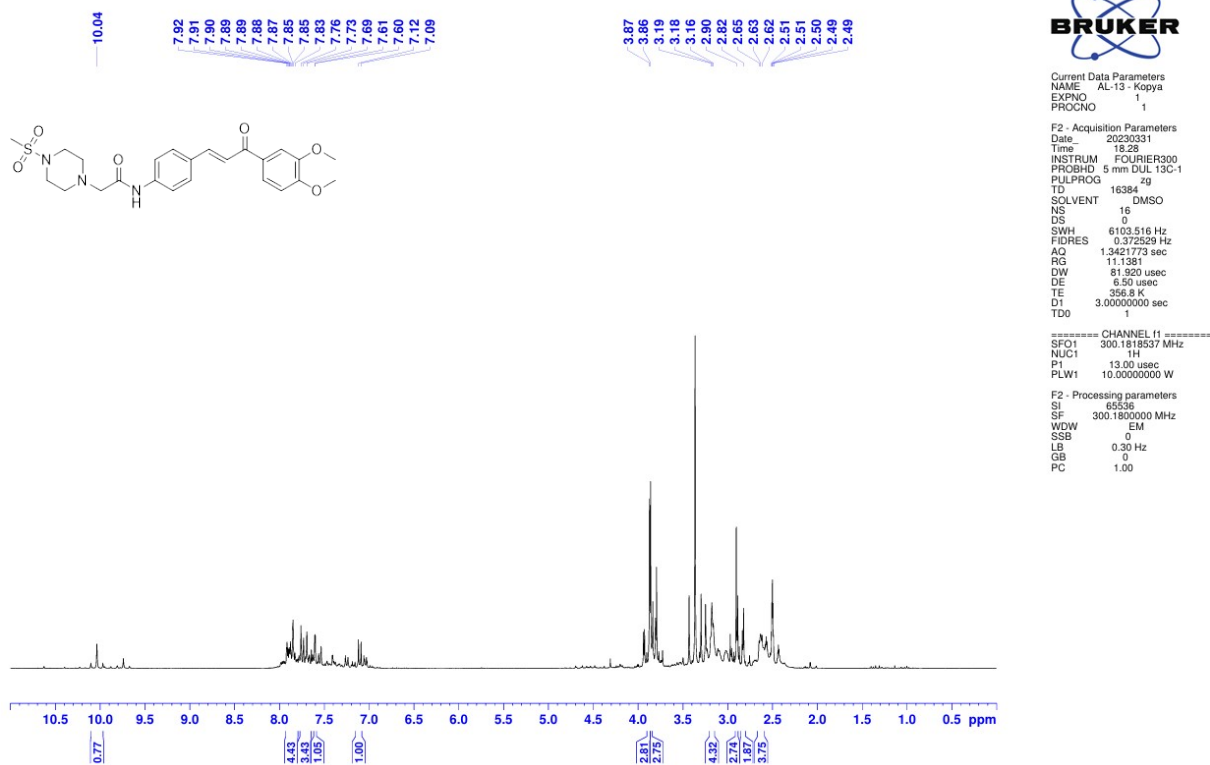

**Figure S62. <sup>1</sup>H-NMR spectra of compound 4m**

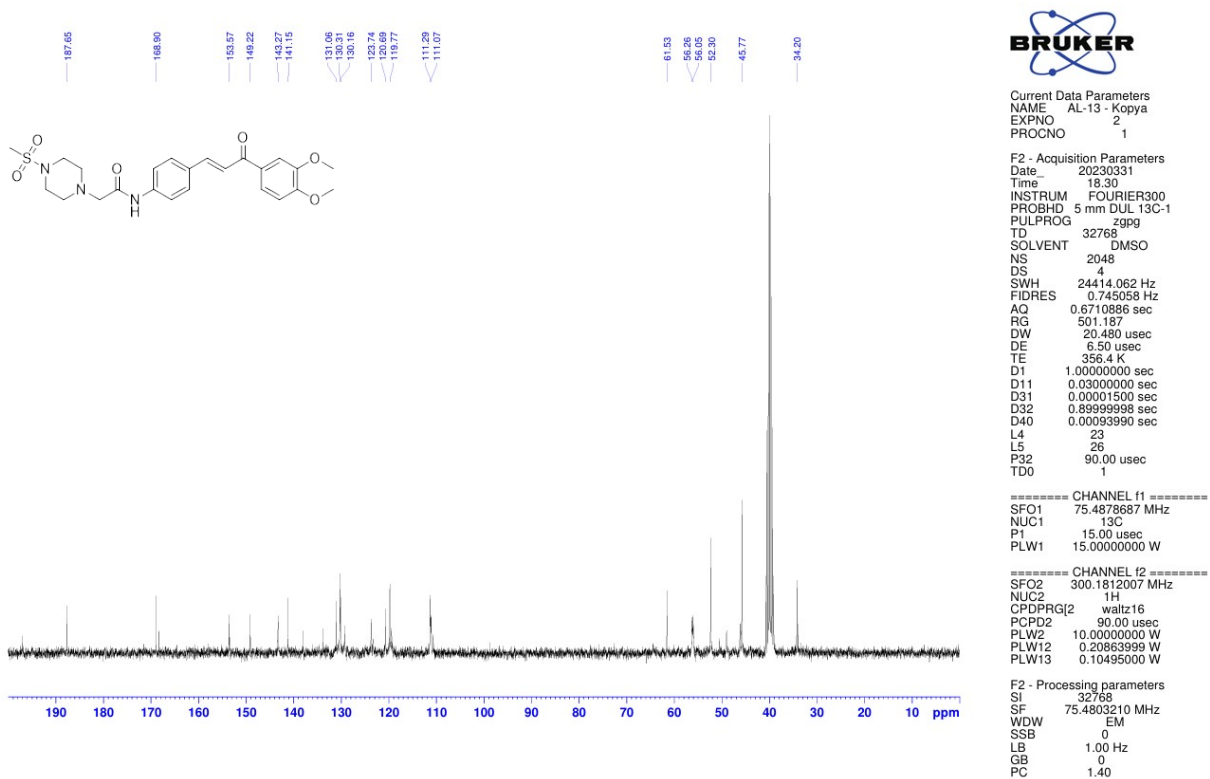

**Figure S63. <sup>13</sup>C-NMR spectra of compound 4m**

Data File: C:\LabSolutions\Data\Analiz\Serkan\AL-13\_209.lcd

| Elmt | Val. | Min | Max | Use Adduct |
|------|------|-----|-----|------|------|-----|-----|------|------|-----|-----|------|------|-----|-----|------------|
| H    | 1    | 0   | 38  | O    | 2    | 0   | 6   | Cl   | 1    | 0   | 0   | I    | 3    | 0   | 0   | H          |
| B    | 3    | 0   | 0   | F    | 1    | 0   | 0   | Br   | 1    | 0   | 0   |      |      |     |     |            |
| C    | 4    | 0   | 32  | P    | 3    | 0   | 0   | Ru   | 2    | 0   | 0   |      |      |     |     |            |
| N    | 3    | 0   | 5   | S    | 2    | 0   | 2   | Pd   | 2    | 0   | 0   |      |      |     |     |            |

Error Margin (ppm): 5

DBE Range: 5.0 - 25.0

Electron Ions: odd

HC Ratio: unlimited

Apply N Rule: yes

Use MSn Info: yes

Max Isotopes: 3

Isotope RI (%): 1.00

Isotope Res: 9000

MSn Iso RI (%): 10.00

MSn Logic Mode: AND

Max Results: 50

Event#: 1 MS(E+) Ret. Time : 2.053 Scan# : 309

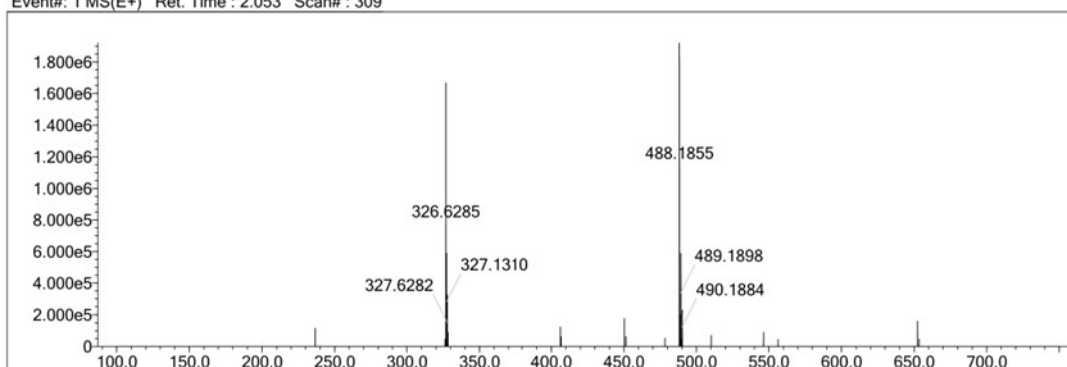

Measured region for 488.1855 m/z

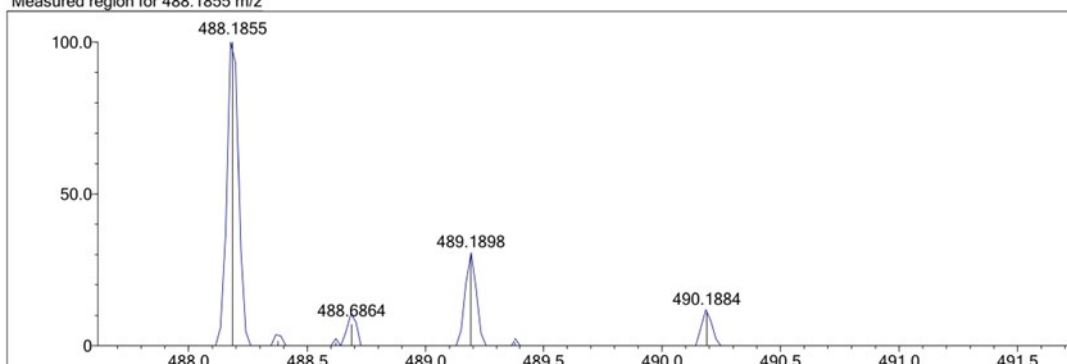C24 H29 N3 O6 S [M+H]<sup>+</sup> : Predicted region for 488.1850 m/z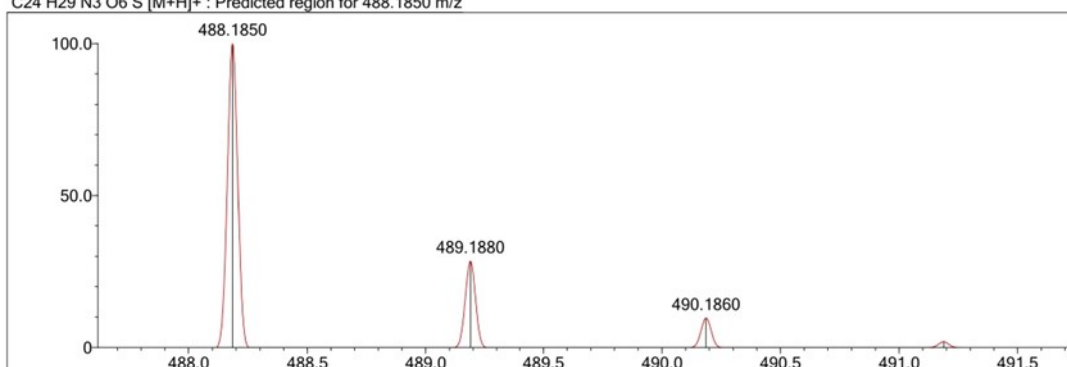

| Rank | Score | Formula (M)     | Ion                | Meas. m/z | Pred. m/z | Df. (mDa) | Df. (ppm) | Iso   | DBE  |
|------|-------|-----------------|--------------------|-----------|-----------|-----------|-----------|-------|------|
| 1    | 94.60 | C24 H29 N3 O6 S | [M+H] <sup>+</sup> | 488.1855  | 488.1850  | 0.5       | 1.02      | 94.65 | 12.0 |

Figure S64. HRMS spectra of compound 4m



# ==== Shimadzu LCMSsolution Analysis Report ====

Acquired by : Admin  
 Sample Name : AL-13  
 Sample ID :  
 Vial # : 13  
 Injection Volume : 0.5 uL  
 Data File Name : AL-13\_209.lcd  
 Method File Name : isocratic\_serkan.lcm  
 Batch File Name : batch.lcb  
 Report File Name : DefaultLCMS.lcr  
 Data Acquired : 02.08.2022 18:57:45  
 Data Processed : 04.09.2025 11:01:09

## <Chromatogram>

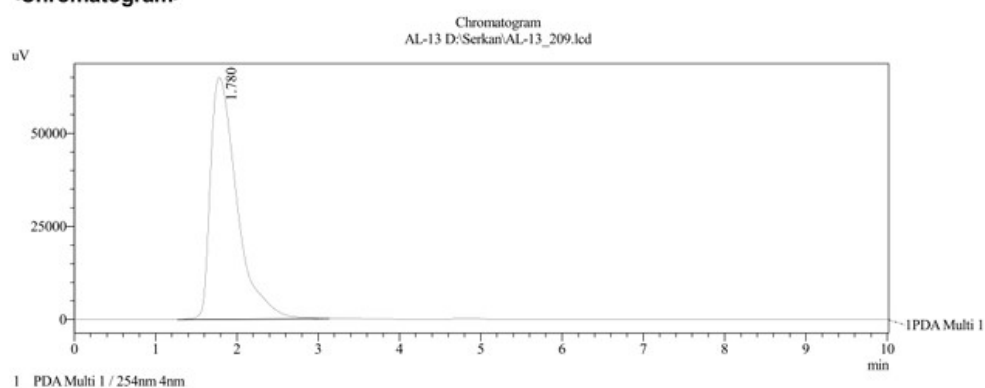

PeakTable

| Peak# | Ret. Time | Area    | Height | Area %  |
|-------|-----------|---------|--------|---------|
| 1     | 1.780     | 1480249 | 65016  | 100.000 |
| Total |           | 1480249 | 65016  | 100.000 |

**Figure S65.** HPLC chromatogram of compound **4m**

## DOPNALAB

| Item               | Value                                                                |
|--------------------|----------------------------------------------------------------------|
| Acquired Date&Time | 17.05.2023 16:05:08                                                  |
| Acquired by        | System Administrator                                                 |
| Filename           | C:\Users\dopnalab\Desktop\MASAÜSTÜ\derya\berkant\AL seri\AL-141.ispd |
| Spectrum name      | AL-141                                                               |
| Sample name        | AL-14                                                                |
| Sample ID          |                                                                      |
| Option             |                                                                      |
| Comment            |                                                                      |
| No. of Scans       | 15                                                                   |
| Resolution         | 4 [cm-1]                                                             |
| Apodization        | Happ-Genzel                                                          |

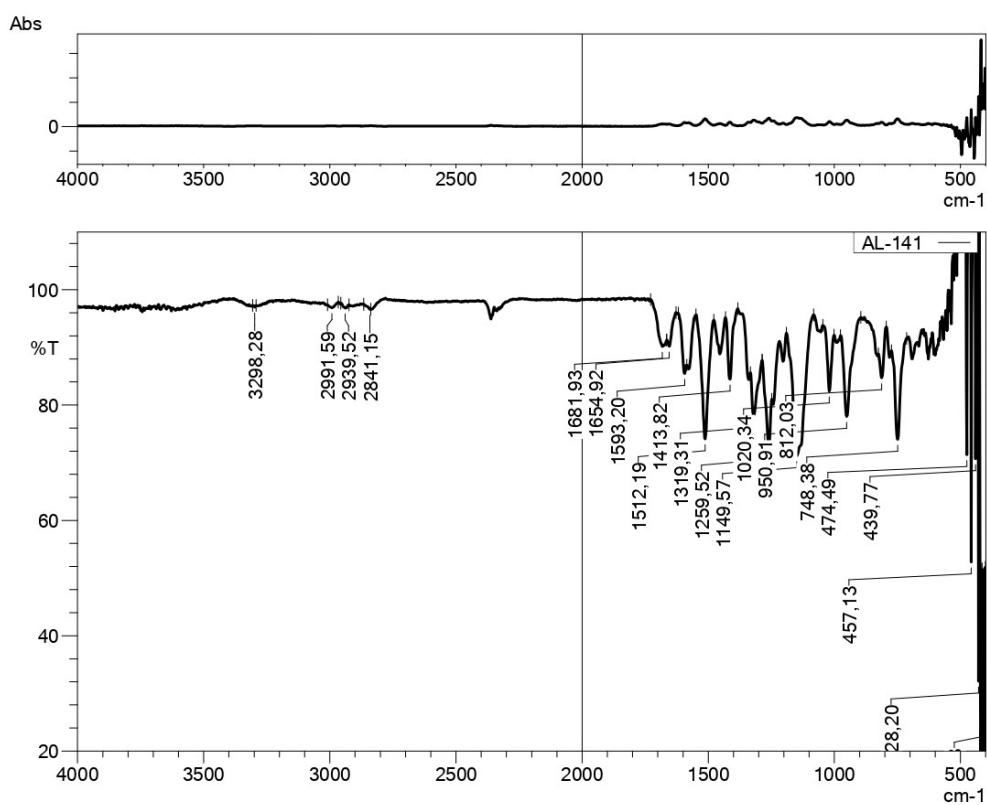

**Figure S66.** FTIR spectra of compound **4n**

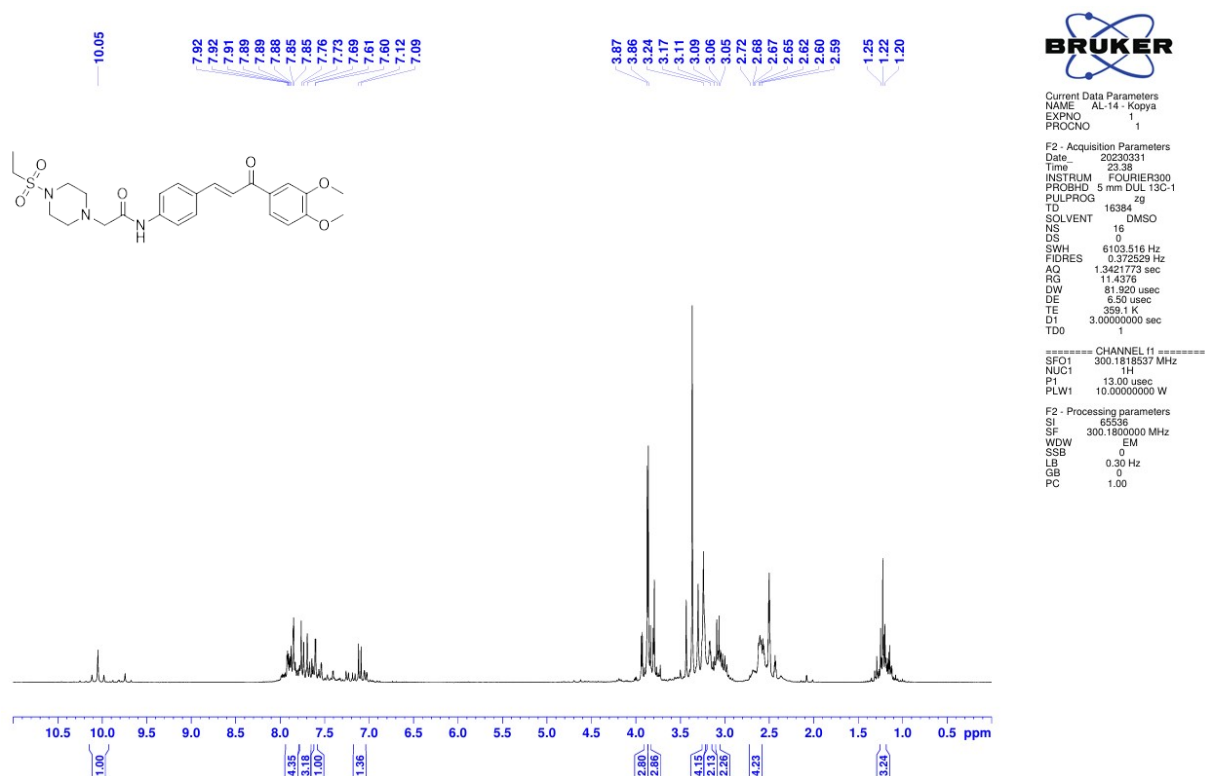

Figure S67. <sup>1</sup>H-NMR spectra of compound 4n

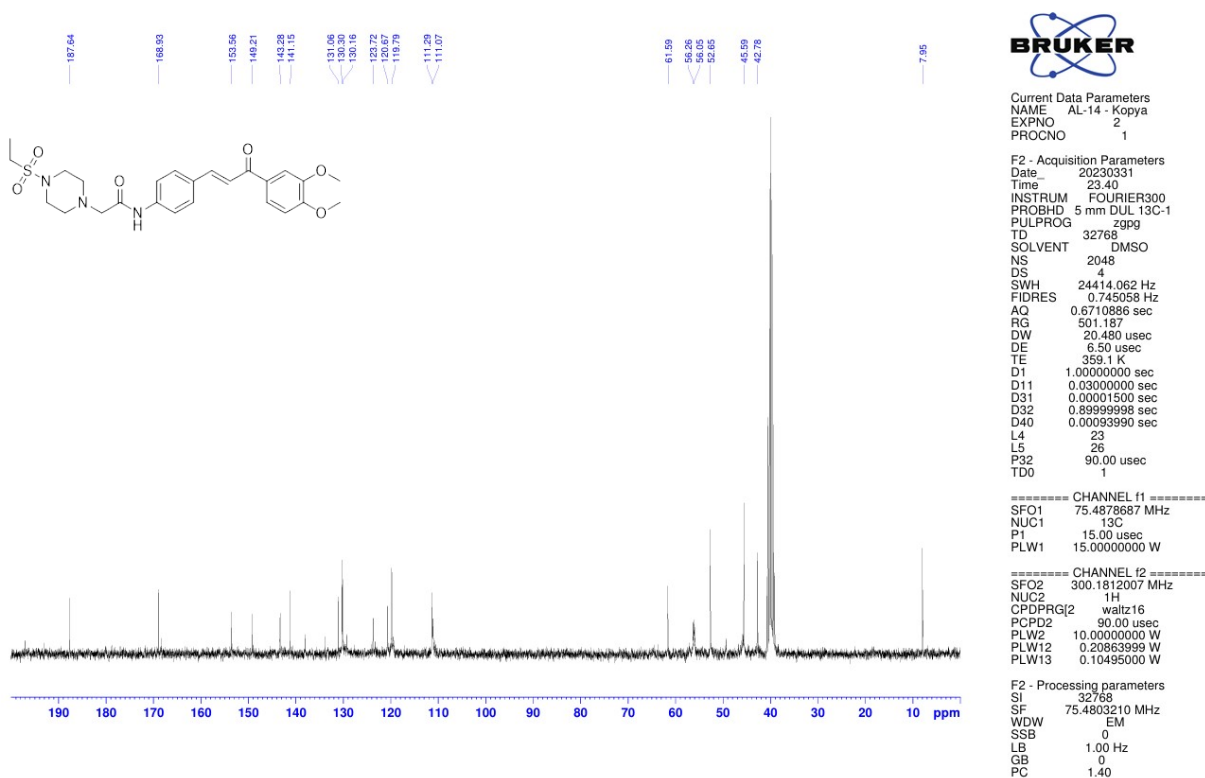

Figure S68. <sup>13</sup>C-NMR spectra of compound 4n

Data File: C:\LabSolutions\Data\Analiz\Serkan\AL-14\_210.lcd

| Elmt | Val. | Min | Max | Use Adduct |
|------|------|-----|-----|------|------|-----|-----|------|------|-----|-----|------|------|-----|-----|------------|
| H    | 1    | 0   | 38  | O    | 2    | 0   | 6   | Cl   | 1    | 0   | 0   | I    | 3    | 0   | 0   | H          |
| B    | 3    | 0   | 0   | F    | 1    | 0   | 0   | Br   | 1    | 0   | 0   |      |      |     |     |            |
| C    | 4    | 0   | 32  | P    | 3    | 0   | 0   | Ru   | 2    | 0   | 0   |      |      |     |     |            |
| N    | 3    | 0   | 5   | S    | 2    | 0   | 2   | Pd   | 2    | 0   | 0   |      |      |     |     |            |

Error Margin (ppm): 5

DBE Range: 5.0 - 25.0

Electron Ions: odd

HC Ratio: unlimited

Apply N Rule: yes

Use MSn Info: yes

Max Isotopes: 3

Isotope RI (%): 1.00

Isotope Res: 9000

MSn Iso RI (%): 10.00

MSn Logic Mode: AND

Max Results: 50

Event#: 1 MS(E+) Ret. Time : 2.213 Scan# : 333

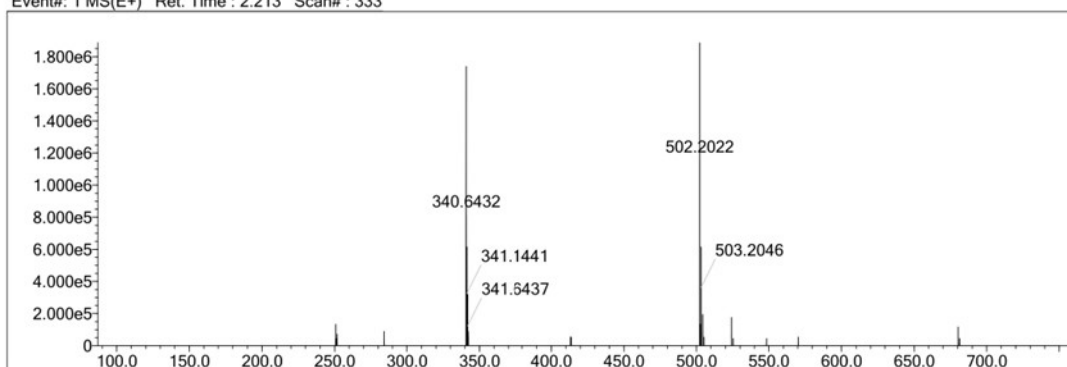

Measured region for 502.2022 m/z

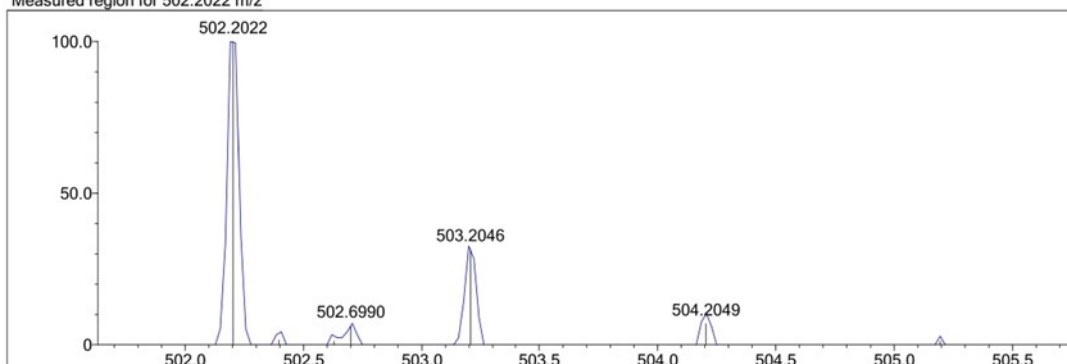C25 H31 N3 O6 S [M+H]<sup>+</sup> : Predicted region for 502.2006 m/z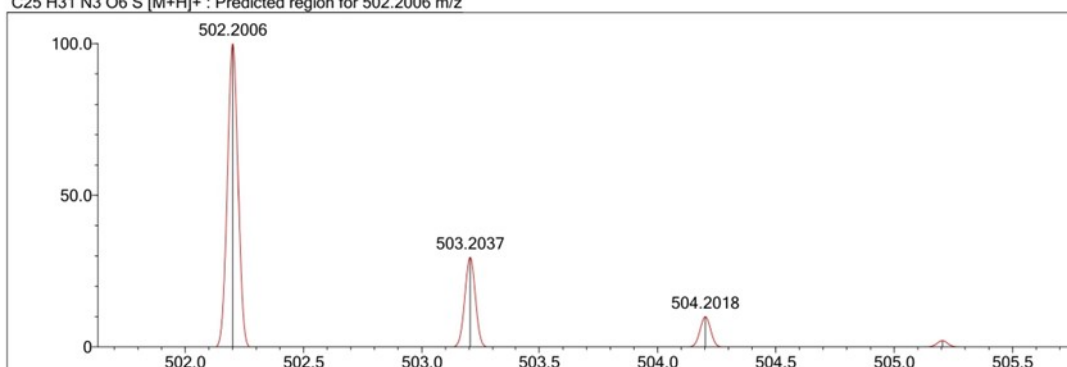

| Rank | Score | Formula (M)     | Ion                | Meas. m/z | Pred. m/z | Df. (mDa) | Df. (ppm) | Iso   | DBE  |
|------|-------|-----------------|--------------------|-----------|-----------|-----------|-----------|-------|------|
| 1    | 81.27 | C25 H31 N3 O6 S | [M+H] <sup>+</sup> | 502.2022  | 502.2006  | 1.6       | 3.19      | 85.98 | 12.0 |

Figure S69. HRMS spectra of compound **4n**

==== Shimadzu LCMSsolution Analysis Report ====

Acquired by : Admin  
Sample Name : AL-14  
Sample ID :  
Vial # : 14  
Injection Volume : 0.5 uL  
Data File Name : AL-14\_210.lcd  
Method File Name : isocratic\_serkan.lcm  
Batch File Name : batch.lcb  
Report File Name : DefaultLCMS.lcr  
Data Acquired : 02.08.2022 19:08:33  
Data Processed : 02.08.2022 19:18:35

<Chromatogram>

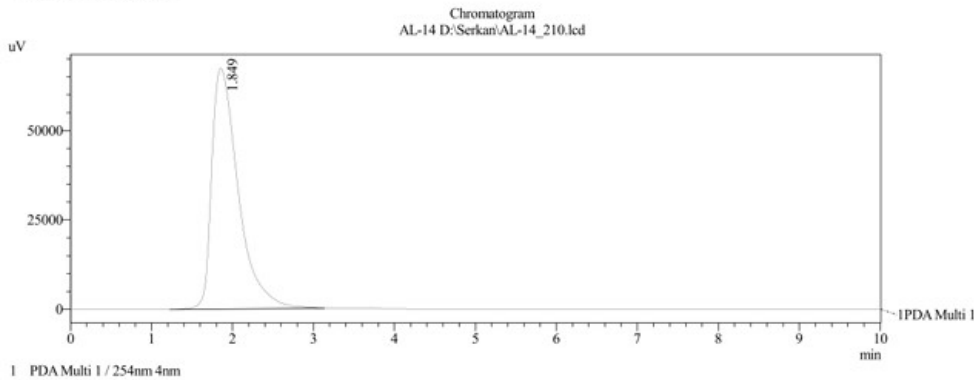

PeakTable

| Peak# | Ret. Time | Area    | Height | Area %  |
|-------|-----------|---------|--------|---------|
| 1     | 1.849     | 1542887 | 67392  | 100.000 |
| Total |           | 1542887 | 67392  | 100.000 |

Figure S70. HPLC chromatogram of compound 4n
